# Supplementary material for: Divergent synthesis of δ-valerolactones and furanones via palladium or copper-catalyzed α-hydroxycyclopropanol ring opening cyclizations
Source: Royal Society of Chemistry journal article supplement (doi:10.1039/d4cc03255a), 2024-01-01

## Supplementary Information

# Divergent Synthesis of $\delta$ -Valerolactones and Furanones via Palladium or Copper-Catalyzed $\alpha$ -Hydroxycyclopropanol Ring Opening Cyclizations

Pedro de Andrade Horn,<sup>a,d</sup> Michael J. E. Collins,<sup>b,d</sup> Cyrus C. Gudeman,<sup>b</sup> Alexandra A. Fresh,<sup>a</sup>  
and Mingji Dai<sup>\*b,c</sup>

<sup>a</sup>Department of Chemistry, Purdue University, West Lafayette, IN 47907, USA

<sup>b</sup>Department of Chemistry, Emory University, Atlanta, GA 30022, USA

Email: [mingji.dai@emory.edu](mailto:mingji.dai@emory.edu). Tel: 001-404-727-4299

<sup>c</sup>Department of Pharmacology and Chemical Biology, Emory University, Atlanta, GA 30022, USA

<sup>d</sup>Contributed Equally

## Table of Contents

|                                                                  |            |
|------------------------------------------------------------------|------------|
| <b>Part 1. Experimental procedures and spectra data.....</b>     | <b>S3</b>  |
| <b>Part 2. References.....</b>                                   | <b>S30</b> |
| <b>Part 3. <sup>1</sup>H and <sup>13</sup>C NMR spectra.....</b> | <b>S31</b> |

## Part 1. Experimental procedures and spectral data.

### General Methods

NMR spectra were recorded on Bruker spectrometers ( $^1\text{H}$  at 400 MHz, 500 MHz,  $^{13}\text{C}$  at 100 MHz, 125 MHz, and  $^{19}\text{F}$  at 376 MHz, 470 MHz). Chemical shifts ( $\delta$ ) were given in ppm with reference to solvent signals [ $^1\text{H}$  NMR:  $\text{CHCl}_3$  (7.26),  $\text{CD}_3\text{OD}$  (3.30);  $^{13}\text{C}$  NMR:  $\text{CDCl}_3$  (77.2),  $\text{CD}_3\text{OD}$  (49.0)].  $^1\text{H}$  NMR data are reported as follows: chemical shift ( $\delta$  ppm), multiplicity (s = singlet, d = doublet, t = triplet, q = quartet, m = multiplet, br = broad), coupling constant (Hz), and integration. High-resolution mass measurements for compound characterization were carried out using a Thermo Exact Plus spectrometer using APCI. IR spectra were collected either on a Nicolet iS10 FT-IR or Nicolet iS50 ATR-IR from Thermo Scientific. Column chromatography was performed on silica gel. All reactions requiring heating were heated in an oil bath. All reactions sensitive to air or moisture were conducted under argon atmosphere in dry solvents under anhydrous conditions, unless otherwise noted. Carbon monoxide balloon was used to introduce carbon monoxide to the reactions (Note: Carbon monoxide is toxic and needs to be handled with caution; the carbon monoxide tank is kept in a fume hood with excellent ventilation). Anhydrous THF,  $\text{CH}_2\text{Cl}_2$ , DMF, MeCN, and toluene were obtained from a Solvent Purification System (Cabinet Mount SPS from Pure Process Technology). All other solvents and reagents were used as obtained from commercial sources without further purification. Room temperature (rt) is around 23 °C.

### Representative procedure I for the synthesis of $\alpha$ -hydroxycyclopropanols:<sup>1,2</sup>

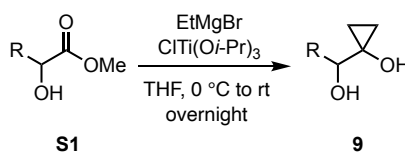

To a solution of  $\alpha$ -hydroxy methyl esters **S1** (1.0 equiv) in THF (0.2 M),  $\text{ClTi}(\text{O}i\text{-Pr})_3$  (2.0 equiv) was added in a single portion. The reaction was then cooled to 0 °C. Next, EtMgBr (3.0 M in  $\text{Et}_2\text{O}$ , 4.0 equiv) was added dropwise over a 10-minute period. The reaction was warmed to room temperature overnight. EtOAc was then added at 0 °C to quench the excess EtMgBr, followed by  $\text{NH}_4\text{Cl}$ . The aqueous phase was extracted another three times with EtOAc, and the combined

organic layers were dried over MgSO<sub>4</sub>, filtered through a short celite pad, and concentrated under reduced pressure. The crude residue was purified using column chromatography to afford  $\alpha$ -hydroxycyclopropanol **15**.

**Representative procedure II for the synthesis of  $\alpha$ -hydroxycyclopropanols:**<sup>1-4</sup>

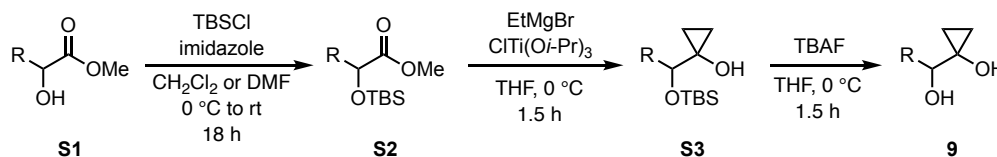

To a solution of the  $\alpha$ -hydroxy methyl ester **S1** (1.0 equiv) and imidazole (2.4 equiv) in CH<sub>2</sub>Cl<sub>2</sub> or DMF (0.15 M), TBSCl (1.2 equiv) was added in one portion at 0 °C. The reaction mixture was stirred for 18 h at room temperature before it was quenched with a saturated NaHCO<sub>3</sub> solution. Layers were separated and the aqueous layer was extracted three more times with CH<sub>2</sub>Cl<sub>2</sub>. The organic layers were combined and dried over MgSO<sub>4</sub>, filtered through a short celite pad, and concentrated under reduced pressure to give the crude product which was purified using column chromatography to afford  $\alpha$ -siloxy methyl ester **S2**.

To a solution of the above  $\alpha$ -siloxy methyl ester **S2** (1.0 equiv) in THF (0.1 M), ClTi(Oi-Pr)<sub>3</sub> (2.0 equiv) was added in a single portion. The reaction was then cooled to 0 °C. Next, EtMgBr (3.0 M in Et<sub>2</sub>O, 4.0 equiv) was added dropwise over a 10-minute period. The reaction was stirred at 0 °C for 1.5 h. EtOAc was then added at 0 °C to quench the excess EtMgBr, followed by NH<sub>4</sub>Cl. The aqueous phase was extracted another three times with EtOAc, and the combined organic layers were dried over MgSO<sub>4</sub>, filtered through a short celite pad, and concentrated under reduced pressure. The crude residue was purified using column chromatography to afford  $\alpha$ -siloxycyclopropanol **S3**.

To a solution of the above  $\alpha$ -siloxycyclopropanol **S3** in THF (0.06 M) at 0 °C, TBAF (1 M in THF, 1.2 equiv) was added dropwise over 5 min. The reaction mixture was stirred at 0 °C for another 1.5 h. After the starting material was consumed, the volatiles were removed under reduced pressure and the crude was dissolved in EtOAc and transferred to a separatory funnel. A saturated NH<sub>4</sub>Cl

solution was added, and the aqueous layer was extracted two more times with EtOAc. The combined organic layers were washed with brine, dried over MgSO<sub>4</sub>, filtered through a short celite pad. The solvents were removed under reduced pressure to give the crude product which was purified using column chromatography to give the desired  $\alpha$ -hydroxycyclopropanol **9**.

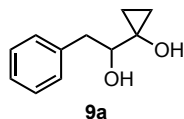

Synthesized following general procedure II; 39% yield over 3 steps.

**<sup>1</sup>H NMR** (500 MHz, CDCl<sub>3</sub>)  $\delta$  7.37-7.29 (m, 2H), 7.28-7.22 (m, 3H), 3.37 (dd,  $J$  = 9.1, 4.3 Hz, 1H), 3.04 (dd,  $J$  = 13.7, 4.3 Hz, 1H), 2.95 (dd,  $J$  = 13.8, 9.2, 1H), 2.60 (bs, 1H), 1.96 (bs, 1H), 0.93-0.74 (m, 2H), 0.63-0.56 (m, 1H), 0.52-0.45 (m, 1H).

**<sup>13</sup>C NMR** (125 MHz, CDCl<sub>3</sub>)  $\delta$  138.3, 129.4, 128.7, 126.6, 77.8, 58.1, 39.8, 13.0, 11.1.

**IR** (ATR, cm<sup>-1</sup>) 3349, 3277, 2948, 2925, 2904, 1603, 1496, 1453, 1420, 1217, 1067.

**HRMS** (APCI+)  $m/z$  calcd for C<sub>11</sub>H<sub>15</sub>O<sub>2</sub> [M+H]<sup>+</sup>: 179.1066; found: 179.1068.

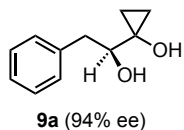

Synthesized following general procedure I; 41% yield; 94% *ee*.

SFC (Chiralpak IA column) 3% MeOH/CO<sub>2</sub> (2.0 mL/min,  $\lambda$  = 210 nm)

| <b>Racemic 9a</b> |          |              |         |
|-------------------|----------|--------------|---------|
|                   | RT (min) | Area (mAU*s) | % Area  |
| 1                 | 6.481    | 573.93634    | 46.2609 |
| 2                 | 7.298    | 575.50488    | 53.7391 |

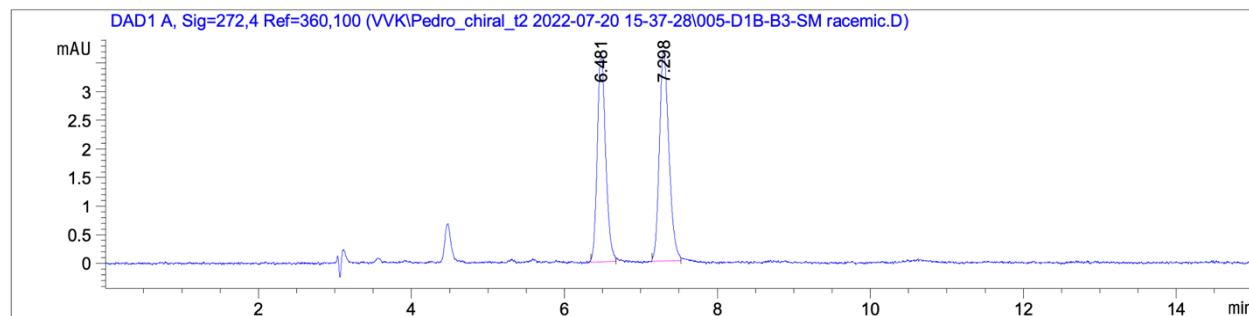

| Enantio-enriched 9a |          |              |         |
|---------------------|----------|--------------|---------|
|                     | RT (min) | Area (mAU*s) | % Area  |
| 1                   | 15.495   | 37.39734     | 3.0239  |
| 2                   | 16.766   | 1056.44800   | 96.9761 |

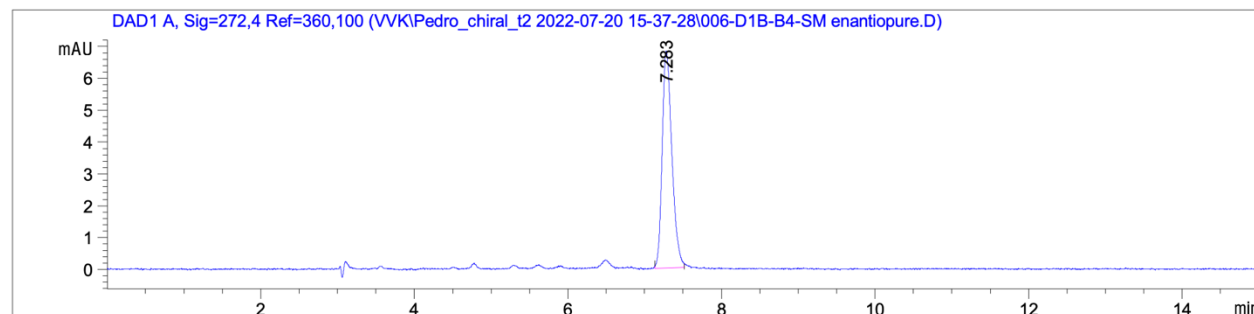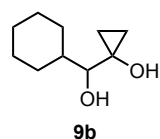

Synthesized following general procedure II; 37% yield over 3 steps.

**<sup>1</sup>H NMR** (500 MHz, CDCl<sub>3</sub>) δ 2.68 (d, *J* = 8.7 Hz, 1H), 2.14-1.91 (m, 4H), 1.81-1.71 (m, 3H), 1.70-1.63 (m, 1H), 1.35-1.21 (m, 2H), 1.19-1.14 (m, 1H), 1.05-0.93 (m, 3H), 0.73-0.62 (m, 2H), 0.51-0.44 (m, 1H).

**<sup>13</sup>C NMR** (125 MHz, CDCl<sub>3</sub>) δ 81.8, 57.5, 41.0, 29.9, 29.4, 26.5, 26.1, 26.0, 13.1, 11.3.

**IR** (ATR, cm<sup>-1</sup>) 3343, 2918, 2846, 2360, 1738, 1448, 1420, 1285, 1228, 1023, 1012.

**HRMS** (APCI+) *m/z* calcd for C<sub>10</sub>H<sub>19</sub>O<sub>2</sub> [M+H]<sup>+</sup>: 171.1379; found: 171.1381.

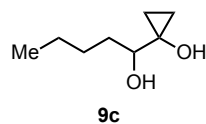

Synthesized following general procedure II; 83% yield over 3 steps.

**<sup>1</sup>H NMR** (500 MHz, CDCl<sub>3</sub>) δ 3.14 (dd, *J* = 8.2, 5.3 Hz, 1H), 2.06 (bs, 2H), 1.72-1.57 (m, 2H), 1.51-1.42 (m, 1H), 1.42-1.29 (m, 3H), 0.92 (t, *J* = 7.1 Hz, 3H), 0.88-0.84 (m, 1H), 0.81-0.76 (m, 1H), 0.59-0.51 (m, 2H).

**<sup>13</sup>C NMR** (125 MHz, CDCl<sub>3</sub>) δ 77.0 (hidden behind solvent peak), 58.7, 32.9, 28.2, 22.8, 14.0, 12.6, 11.3.

**IR** (ATR,  $\text{cm}^{-1}$ ) 3236, 2953, 2933, 2871, 2856, 1736, 1464, 1454, 1429, 1284, 1220, 1066, 1006.

**HRMS** (APCI+)  $m/z$  calcd for  $\text{C}_8\text{H}_{17}\text{O}_2$   $[\text{M}+\text{H}]^+$ : 145.1223; found: 145.1225.

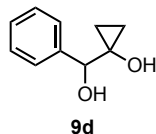

Synthesized following general procedure I; 23% yield.

**$^1\text{H}$  NMR** (500 MHz,  $\text{CDCl}_3$ )  $\delta$  7.46-7.42 (m, 2H), 7.40-7.35 (m, 2H), 7.34-7.29 (m, 1H), 4.49 (s, 1H), 0.93-0.87 (m, 1H), 0.86-0.80 (m, 1H), 0.79-0.68 (m, 2H).

**$^{13}\text{C}$  NMR** (125 MHz,  $\text{CDCl}_3$ )  $\delta$  140.8, 128.4, 128.0, 126.6, 78.0, 59.4, 12.1, 11.4.

**IR** (ATR,  $\text{cm}^{-1}$ ) 3174, 2882, 2360, 1450, 1418, 1280, 1198, 1039, 1024.

**HRMS** (APCI+)  $m/z$  calcd for  $\text{C}_{10}\text{H}_{13}\text{O}_2$   $[\text{M}+\text{H}]^+$ : 165.0910; found: 165.0913.

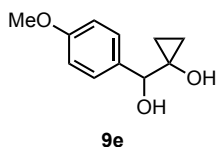

Synthesized following general procedure I; 20% yield.

**$^1\text{H}$  NMR** (500 MHz,  $\text{CDCl}_3$ )  $\delta$  7.39-7.34 (m, 2H), 6.95-6.87 (m, 2H), 4.46 (d,  $J = 3.8$  Hz, 1H), 3.81 (s, 3H), 2.30-2.24 (m, 2H), 0.89 (ddd,  $J = 10.1, 5.4, 3.6$  Hz, 1H), 0.81 (ddd,  $J = 9.3, 5.6, 4.2$  Hz, 1H), 0.75-0.66 (m, 2H).

**$^{13}\text{C}$  NMR** (125 MHz,  $\text{CDCl}_3$ )  $\delta$  159.4, 132.9, 127.8, 113.8, 77.5, 59.4, 55.3, 12.0, 11.2.

**IR** (ATR,  $\text{cm}^{-1}$ ) 3426, 2963, 2935, 2839, 2586, 1778, 1696, 1674, 1600, 1574, 1512, 1246, 1172, 1027.

**HRMS** (APCI+)  $m/z$  calcd for  $\text{C}_{11}\text{H}_{11}\text{O}_3$   $[\text{M}+\text{H}]^+$ : 191.0702; found: 191.0703.

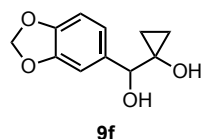

Synthesized following general procedure II; 38% yield over 3 steps.

**$^1\text{H}$  NMR** (500 MHz,  $\text{CD}_3\text{OD}$ )  $\delta$  6.98 (d,  $J = 1.7$  Hz, 1H), 6.87 (dd,  $J = 8.0, 1.7$  Hz, 1H), 6.75 (d,  $J = 8.0$  Hz, 1H), 5.90 (s, 2H), 4.36 (s, 1H), 0.75-0.66 (m, 3H), 0.65-0.60 (m, 1H).

**$^{13}\text{C}$  NMR** (125 MHz,  $\text{CD}_3\text{OD}$ )  $\delta$  147.4, 146.8, 136.2, 120.2, 107.3, 107.1, 100.7, 76.8, 57.9, 11.0, 9.8.

**IR** (ATR,  $\text{cm}^{-1}$ ) 3310, 2891, 2359, 1737, 1500, 1485, 1434, 1285, 1238, 1216, 1182, 1054, 1037.

**HRMS** (APCI+)  $m/z$  calcd for  $\text{C}_{11}\text{H}_{13}\text{O}_4$   $[\text{M}+\text{H}]^+$ : 209.0808; found: 209.0810.

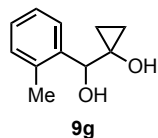

Synthesized following general procedure II; 60% yield over 3 steps.

**$^1\text{H}$  NMR** (500 MHz,  $\text{CDCl}_3$ )  $\delta$  7.55 (dd,  $J = 7.2, 2.0$  Hz, 1H), 7.23-7.15 (m, 2H), 7.13 (dd,  $J = 7.1, 1.9$  Hz, 1H), 5.09 (s, 1H), 3.07 (bs, 1H), 2.76 (bs, 1H), 2.34 (s, 3H), 0.83 (ddd,  $J = 10.7, 6.8, 5.1$  Hz, 1H), 0.73 (ddd,  $J = 10.6, 6.7, 5.5$  Hz, 1H), 0.64 (ddd,  $J = 10.7, 6.8, 5.3$  Hz, 1H), 0.38 (ddd,  $J = 10.6, 6.7, 5.1$  Hz, 1H).

**$^{13}\text{C}$  NMR** (125 MHz,  $\text{CDCl}_3$ )  $\delta$  138.5, 135.7, 130.3, 127.7, 126.4, 126.0, 73.9, 58.6, 19.7, 11.9, 9.9.

**IR** (ATR,  $\text{cm}^{-1}$ ) 3372, 2248, 1778, 1202, 1025, 905.

**HRMS** (APCI+)  $m/z$  calcd for  $\text{C}_{11}\text{H}_{13}\text{O}_2$   $[\text{M}+\text{H}]^+$ : 117.0910; found: 117.0912.

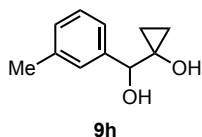

Synthesized following general procedure II; 49% yield over 3 steps.

**$^1\text{H}$  NMR** (500 MHz,  $\text{CDCl}_3$ )  $\delta$  7.29-7.19 (m, 3H), 7.14-7.10 (m, 1H), 4.43 (s, 1H), 2.41 (bs, 2H), 2.87 (s, 3H), 0.88 (ddd,  $J = 10.6, 6.2, 4.3$  Hz, 1H), 0.81 (ddd,  $J = 10.2, 6.3, 4.9$  Hz, 1H), 0.78-0.65 (m, 2H).

**$^{13}\text{C}$  NMR** (125 MHz,  $\text{CDCl}_3$ )  $\delta$  140.8, 138.1, 128.7, 128.3, 127.3, 123.7, 78.0, 59.3, 21.5, 12.1, 11.4.

**IR** (ATR,  $\text{cm}^{-1}$ ) 3239, 3034, 3008, 2917, 1607, 1466, 1424, 1412, 1375, 1291, 1235, 1209, 1149, 1029, 1021.

**HRMS** (APCI+)  $m/z$  calcd for  $\text{C}_{11}\text{H}_{13}\text{O}_2$   $[\text{M}+\text{H}]^+$ : 177.0910; found: 177.0911.

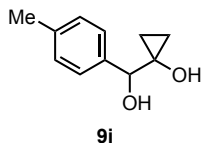

Synthesized following general procedure I; 20% yield.



**<sup>1</sup>H NMR** (500 MHz, CDCl<sub>3</sub>) δ 7.36-7.33 (m, 2H), 7.23-7.18 (m, 2H), 4.48 (s, 1H), 2.40-2.36 (m, 4H), 2.34 (bs, 1H), 0.93-0.88 (m, 1H), 0.86-0.81 (m, 1H), 0.79-0.68 (m, 2H).

**<sup>13</sup>C NMR** (125 MHz, CDCl<sub>3</sub>) δ 137.8, 137.7, 129.1, 126.5, 77.8, 59.4, 21.1, 12.0, 11.3.

**IR** (ATR, cm<sup>-1</sup>) 3370, 2921, 2648, 1701, 1683, 1605, 1413, 1207, 1177, 1034, 1019.

**HRMS** (APCI+) *m/z* calcd for C<sub>11</sub>H<sub>15</sub>O<sub>2</sub> [M+H]<sup>+</sup>: 179.1066; found: 179.1066.

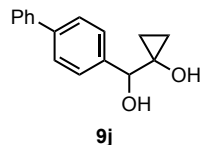

Synthesized following general procedure I; 21% yield.

**<sup>1</sup>H NMR** (500 MHz, CDCl<sub>3</sub>) δ 7.63-7.57 (m, 4H), 7.54-7.50 (m, 2H), 7.47-7.42 (m, 2H), 7.38-7.33 (m, 1H), 4.53 (s, 1H), 2.46-2.31 (m, 2H), 0.96-0.90 (m, 1H), 0.90-0.84 (m, 1H), 0.83-0.72 (m, 2H).

**<sup>13</sup>C NMR** (125 MHz, CDCl<sub>3</sub>) δ 140.9, 140.8, 139.8, 128.8, 127.4, 127.2, 127.1, 127.1, 77.8, 59.4, 12.2, 11.5.

**IR** (ATR, cm<sup>-1</sup>) 3272, 3032, 2901, 2359, 1737, 1486, 1409, 1203, 1191, 1037, 1018, 1003.

**HRMS** (APCI+) *m/z* calcd for C<sub>16</sub>H<sub>17</sub>O<sub>2</sub> [M+H]<sup>+</sup>: 241.1223; found: 241.1225.

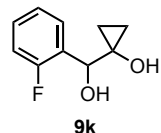

Synthesized following general procedure I; 22% yield.

**<sup>1</sup>H NMR** (500 MHz, CDCl<sub>3</sub>) δ 7.64-7.61 (m, 1H), 7.32-7.26 (m, 1H), 7.20-7.17 (m, 1H), 7.07-7.03 (m, 1H), 4.84 (s, 1H), 2.45 (bs, 1H), 2.36 (bs, 1H), 0.93 (ddd, *J* = 10.5, 7.2, 4.9 Hz, 1H), 0.84-0.74 (m, 2H), 0.70 (ddd, *J* = 10.0, 7.0, 4.9 Hz, 1H).

**<sup>13</sup>C NMR** (125 MHz, CDCl<sub>3</sub>) δ 159.8 (d, *J* = 245.7 Hz), 129.3 (d, *J* = 8.4 Hz), 128.4 (d, *J* = 4.2 Hz), 127.8 (d, *J* = 13.1 Hz), 124.2 (d, *J* = 3.5 Hz), 115.3 (d, *J* = 22.3 Hz), 72.0, 59.0, 12.8, 11.0.

**<sup>19</sup>F NMR** (470 MHz, CDCl<sub>3</sub>) δ -118.9.

**IR** (ATR, cm<sup>-1</sup>) 3347, 2919, 1616, 1587, 1488, 1454, 1274, 1225, 1030.

**HRMS** (APCI+) *m/z* calcd for C<sub>10</sub>H<sub>12</sub>O<sub>2</sub>F [M+H]<sup>+</sup>: 183.0815; found: 183.0819.

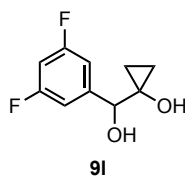

Synthesized following general procedure II; 45% yield over 3 steps.

**<sup>1</sup>H NMR** (500 MHz, CDCl<sub>3</sub>) δ 7.04-6.95 (m, 2H), 6.77-6.73 (m, 1H), 4.38 (s, 1H), 2.49 (bs, 1H), 2.27 (bs, 1H), 0.99-0.86 (m, 2H), 0.80-0.76 (m, 1H), 0.75-0.70 (m, 1H).

**<sup>13</sup>C NMR** (125 MHz, CDCl<sub>3</sub>) δ 163.0 (dd, *J* = 248.6, 12.5 Hz), 144.9 (t, *J* = 8.7 Hz), 109.6 (dd, *J* = 19.9, 6.2 Hz), 103.2 (t, *J* = 25.3 Hz), 77.3 (under CHCl<sub>3</sub> residual peak), 59.2, 12.4, 11.8

**<sup>19</sup>F NMR** (470 MHz, CDCl<sub>3</sub>) δ -110.6.

**IR** (ATR, cm<sup>-1</sup>) 3340, 1625, 1595, 1453, 1315, 1278, 1222, 1200, 1115, 1059, 1019.

**HRMS** (APCI+) *m/z* calcd for C<sub>10</sub>H<sub>11</sub>O<sub>2</sub>F<sub>2</sub> [M+H]<sup>+</sup>: 201.0721; found: 201.0723.

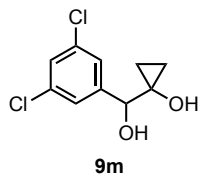

Synthesized following general procedure II; 31% yield over 3 steps.

**<sup>1</sup>H NMR** (500 MHz, CDCl<sub>3</sub>) δ = 7.35 (dd, *J* = 1.88, 0.65 Hz, 2H), 7.31 (t, *J* = 1.99 Hz, 1H), 4.35 (s, 1H), 0.96-0.89 (m, 2H), 0.80-0.71 (m, 2H).

**<sup>13</sup>C NMR** (125 MHz, CDCl<sub>3</sub>) δ 144.3, 135.0, 128.0, 125.2, 77.1, 59.2, 12.4, 11.8.

**IR** (ATR, cm<sup>-1</sup>) 3342, 3280, 1593, 1572, 1422, 1382, 1215, 1195, 1100, 1046, 1013.

**HRMS** (APCI-) *m/z* calcd for C<sub>10</sub>H<sub>9</sub>O<sub>2</sub><sup>35</sup>Cl<sub>2</sub> [M-H]<sup>-</sup>: 230.9985; found: 230.9984.

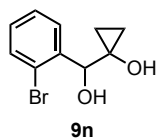

Synthesized following general procedure I; 20% yield.

**<sup>1</sup>H NMR** (500 MHz, CDCl<sub>3</sub>) δ 7.69 (dd, *J* = 7.8, 1.8 Hz, 1H), 7.53 (dd, *J* = 8.0, 1.3 Hz, 1H), 7.36-7.32 (m, 1H), 7.16 (ddd, *J* = 8.0, 7.3, 1.8 Hz, 1H), 5.10 (s, 1H), 2.71 (bs, 2H), 0.90 (ddd, *J* = 10.6, 6.7, 5.1 Hz, 1H), 0.82 (ddd, *J* = 10.5, 6.8, 5.5 Hz, 1H), 0.76 (ddd, *J* = 10.6, 6.8, 5.4 Hz, 1H), 0.58 (ddd, *J* = 10.3, 6.8, 5.1 Hz, 1H).

**<sup>13</sup>C NMR** (125 MHz, CDCl<sub>3</sub>) δ 139.7, 132.7, 129.4, 129.0, 127.5, 123.2, 76.1, 58.6, 12.8, 10.4.

**IR** (ATR, cm<sup>-1</sup>) 3351, 2958, 2922, 2852, 1716, 1467, 1435, 1275, 1196, 1038, 1017.

**HRMS** (APCI+)  $m/z$  calcd for  $C_{10}H_{12}O_2^{79}Br$   $[M+H]^+$ : 243.0015; found: 243.0015.

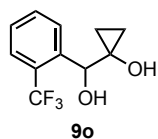

Synthesized following general procedure II; 37% yield over 3 steps.

**$^1H$  NMR** (500 MHz,  $CDCl_3$ )  $\delta$  7.95 (d,  $J = 7.9$  Hz, 1H), 7.64 (d,  $J = 7.9$  Hz, 1H), 7.57-7.53 (m, 1H), 7.41-7.26 (m, 1H), 5.06 (s, 1H), 3.14 (bs, 2H), 0.90-0.80 (m, 1H), 0.77-0.64 (m, 2H), 0.54-0.46 (m, 1H).

**$^{13}C$  NMR** (125 MHz,  $CDCl_3$ )  $\delta$  139.4, 132.0, 129.1, 128.0, 127.9 (q,  $J = 30.3$  Hz), 125.6 (q,  $J = 6.3$  Hz), 124.2 (q,  $J = 274.0$  Hz), 72.6, 58.8, 13.3, 10.1.

**$^{19}F$  NMR** (376 MHz,  $CDCl_3$ )  $\delta$  -57.2.

**IR** (ATR,  $cm^{-1}$ ) 3358, 1455, 1309, 1202, 1158, 1114, 1063, 1041, 1027.

**HRMS** (ESI-)  $m/z$  calcd for  $C_{11}H_{10}O_2F_3$   $[M-H]^-$ : 231.0627; found: 231.0630.

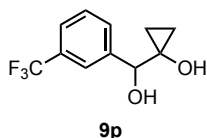

Synthesized following general procedure II; 60% yield over 3 steps.

**$^1H$  NMR** (500 MHz,  $CDCl_3$ )  $\delta$  7.74-7.70 (m, 1H), 7.64 (d,  $J = 7.9$  Hz, 1H), 7.58 (dd,  $J = 8.2, 1.5$  Hz, 1H), 7.49 (t,  $J = 7.7$  Hz, 1H), 4.50 (s, 1H), 2.62-2.19 (m, 2H), 0.99-0.84 (m, 2H), 0.81-0.68 (m, 2H).

**$^{13}C$  NMR** (125 MHz,  $CDCl_3$ )  $\delta$  141.8, 130.8 (q,  $J = 33.0$  Hz), 130.0, 128.8, 124.7 (q,  $J = 3.8$  Hz), 124.1 (q,  $J = 272.6$  Hz), 123.5 (q,  $J = 3.6$  Hz), 77.6, 59.3, 12.4, 11.6.

**$^{19}F$  NMR** (376 MHz,  $CDCl_3$ )  $\delta$  -62.6.

**IR** (ATR,  $cm^{-1}$ ) 3353, 2886, 1707, 1452, 1327, 1216, 1159, 1111, 1099, 1071, 1042, 1016.

**HRMS** (APCI+)  $m/z$  calcd for  $C_{11}H_{12}O_2F_3$   $[M+H]^+$ : 233.0783; found: 233.0786.

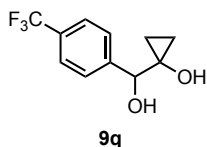

Synthesized following general procedure II; 63% yield over 3 steps.

**$^1H$  NMR** (500 MHz,  $CDCl_3$ )  $\delta$  7.63 (d,  $J = 8.1$  Hz, 2H), 7.57 (d,  $J = 8.1$  Hz, 2H), 4.49 (s, 1H), 2.58-2.15 (m, 2H), 0.97-0.84 (m, 2H), 0.82-0.67 (m, 2H).

$^{13}\text{C}$  NMR (125 MHz,  $\text{CDCl}_3$ )  $\delta$  144.7, 130.1 (q,  $J = 32.2$  Hz), 127.0, 125.3 (q,  $J = 3.9$  Hz), 124.1 (q,  $J = 272.0$  Hz), 77.6, 59.4, 12.4, 11.6.

$^{19}\text{F}$  NMR (470 MHz,  $\text{CDCl}_3$ )  $\delta$  -63.7.

IR (ATR,  $\text{cm}^{-1}$ ) 3274, 2359, 1618, 1413, 1375, 1257, 1163, 1108, 1064, 1054, 1014.

HRMS (APCI+)  $m/z$  calcd for  $\text{C}_{11}\text{H}_{12}\text{O}_2\text{F}_3$   $[\text{M}+\text{H}]^+$ : 233.0783; found: 233.0786.

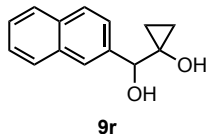

Synthesized following general procedure II; 33% yield over 3 steps.

$^1\text{H}$  NMR (500 MHz,  $\text{CDCl}_3$ )  $\delta$  7.93-7.89 (m, 1H), 7.87-7.79 (m, 3H), 7.55 (dd,  $J = 8.5, 1.8$  Hz, 1H), 7.52-7.46 (m, 2H), 4.65 (s, 1H), 2.36 (bs, 2H), 0.93 (ddd,  $J = 9.7, 6.8, 4.6$  Hz, 1H), 0.84 (dddd,  $J = 16.5, 9.9, 6.5, 5.1$  Hz, 2H), 0.75 (ddd,  $J = 10.0, 6.9, 4.6$  Hz, 1H).

$^{13}\text{C}$  NMR (125 MHz,  $\text{CDCl}_3$ )  $\delta$  138.2, 133.2, 133.1, 128.14, 128.08, 127.7, 126.3, 126.1, 125.5, 124.7, 78.1, 59.5, 12.1, 11.5.

IR (ATR,  $\text{cm}^{-1}$ ) 3264, 3177, 2359, 1601, 1414, 1281, 1193, 1037.

HRMS (APCI+)  $m/z$  calcd for  $\text{C}_{14}\text{H}_{15}\text{O}_2$   $[\text{M}+\text{H}]^+$ : 215.1066; found: 215.1068.

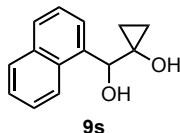

Synthesized following general procedure I; 16% yield.

$^1\text{H}$  NMR (500 MHz,  $\text{CDCl}_3$ )  $\delta$  8.08-8.01 (m, 1H), 7.88-7.81 (m, 1H), 7.79-7.73 (m, 2H), 7.53-7.39 (m, 3H), 5.60 (s, 1H), 3.49 (bs, 2H), 0.83 (dt,  $J = 11.7, 6.1$  Hz, 1H), 0.73 (dt,  $J = 11.1, 6.1$  Hz, 1H), 0.63 (dt,  $J = 11.8, 6.2$  Hz, 1H), 0.35 (dt,  $J = 11.1, 6.0$  Hz, 1H).

$^{13}\text{C}$  NMR (125 MHz,  $\text{CDCl}_3$ )  $\delta$  136.1, 133.6, 131.2, 128.8, 128.4, 126.2, 125.6, 125.3, 124.5, 123.5, 74.0, 59.0, 13.0, 10.5.

IR (ATR,  $\text{cm}^{-1}$ ) 3343, 3050, 3009, 2923, 1711, 1597, 1414, 1395, 1270, 1199, 1062, 1018, 994, 783.

HRMS (APCI+)  $m/z$  calcd for  $\text{C}_{14}\text{H}_{15}\text{O}_2$   $[\text{M}+\text{H}]^+$ : 215.1066; found: 215.1068.

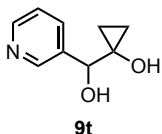

Synthesized following general procedure II; 22% yield over 3 steps.

**<sup>1</sup>H NMR** (400 MHz, CD<sub>3</sub>OD) δ 8.61 (d, *J* = 1.72 Hz, 1H), 8.42 (dd, *J* = 6.75, 1.72 Hz, 1H), 7.94 (dt, *J* = 8.0, 1.76 Hz, 1H), 7.41 (ddd, *J* = 7.9, 4.9, 0.9 Hz), 4.42 (s, 1H), 3.31-3.28 (m, 1H), 0.86-0.76 (m, 2H), 0.77-0.73 (m, 1H), 0.70-0.65 (m, 1H).

**<sup>13</sup>C NMR** (100 MHz, CD<sub>3</sub>OD) δ 147.6, 147.2, 139.1, 135.8, 123.4, 74.7, 57.7, 10.8, 10.2.

**IR** (ATR, cm<sup>-1</sup>) 3340, 3073, 2697, 1596, 1580, 1481, 1284, 1059, 1042.

**HRMS** (APCI-) *m/z* calcd for C<sub>9</sub>H<sub>12</sub>O<sub>2</sub>N [M+H]<sup>+</sup>: 166.0968; found: 166.0852.

### Representative procedure for the palladium-catalyzed carbonylative lactonization:

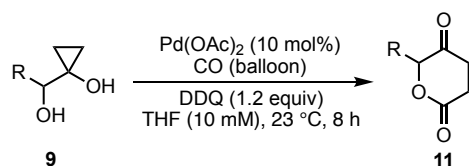

To a stirred solution of α-hydroxycyclopropanol **9** (1.0 equiv, 0.1 mmol) and DDQ (1.2 equiv, 0.12 mmol, 27.2 mg) in THF (0.01 M, 10 mL) under carbon monoxide atmosphere (the reactor was evacuated and backfilled three times using a carbon monoxide balloon) was added Pd(OAc)<sub>2</sub> (0.1 equiv, 0.01 mmol, 2.24 mg) in one portion. The resulting solution was stirred at room temperature for 8 h. The volatiles were then removed. The residue was dissolved in EtOAc (30 mL) and transferred into a separatory funnel. Next, the organic layer was washed two times with a saturated Na<sub>2</sub>S<sub>2</sub>O<sub>3</sub> solution (10 mL), two times with a saturated NaHCO<sub>3</sub> solution (10 mL), and two times with brine (10 mL). The organic layer was then dried over MgSO<sub>4</sub>, filtered through a short celite plug, and concentrated under reduced pressure. The crude residue was purified using column chromatography to afford 4-keto-δ-valerolactone **11**.

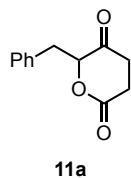

12.1 mg, 59%; 581 mg, 51% (1.0 gram scale)

**<sup>1</sup>H NMR** (500 MHz, CDCl<sub>3</sub>) δ 7.35-7.18 (m, 5H), 4.93-4.87 (m, 1H), 3.27 (dd, *J* = 14.5, 4.3 Hz, 1H), 3.19 (ddt, *J* = 14.5, 6.1, 1.5 Hz, 1H), 2.74-2.59 (m, 2H), 2.50-2.36 (m, 1H), 2.34-2.23 (m, 1H).

$^{13}\text{C}$  NMR (125 MHz,  $\text{CDCl}_3$ )  $\delta$  204.8, 169.4, 135.1, 130.0, 128.8, 127.4, 83.9, 37.3, 34.0, 27.5.

IR (ATR,  $\text{cm}^{-1}$ ) 2924, 1752, 1727, 1497, 1454, 1304, 1257, 1159, 1136, 1071, 1030, 1018.

HRMS (APCI+)  $m/z$  calcd for  $\text{C}_{12}\text{H}_{13}\text{O}_3$   $[\text{M}+\text{H}]^+$ : 205.0859; found: 205.0861.

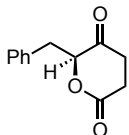

**11a** (55%, 85% ee)

SFC (Chiralpak IA column) 3% MeOH/ $\text{CO}_2$  (2.0 mL/min,  $\lambda = 210$  nm)

| Racemic 11a |          |              |         |
|-------------|----------|--------------|---------|
|             | RT (min) | Area (mAU*s) | % Area  |
| 1           | 15.495   | 6816.87354   | 47.1827 |
| 2           | 16.766   | 7630.96143   | 52.8173 |

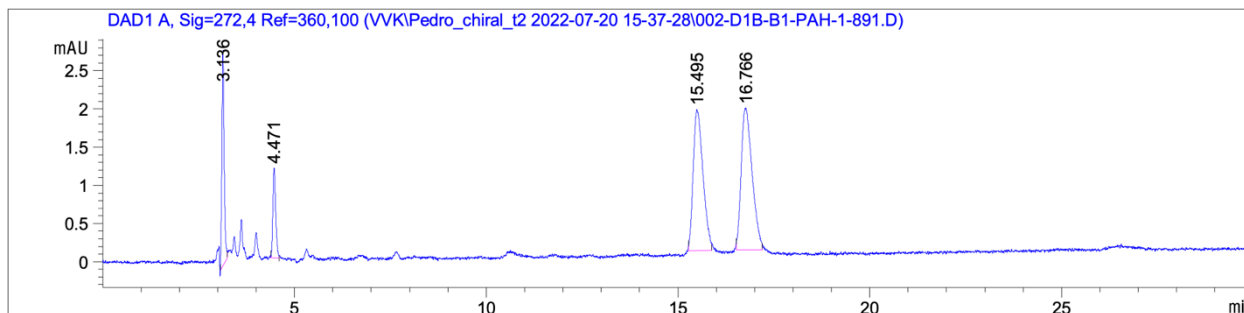

| Enantio-enriched 11a |          |              |         |
|----------------------|----------|--------------|---------|
|                      | RT (min) | Area (mAU*s) | % Area  |
| 1                    | 15.553   | 582.559      | 7.3821  |
| 2                    | 16.702   | 7308.97      | 92.6179 |

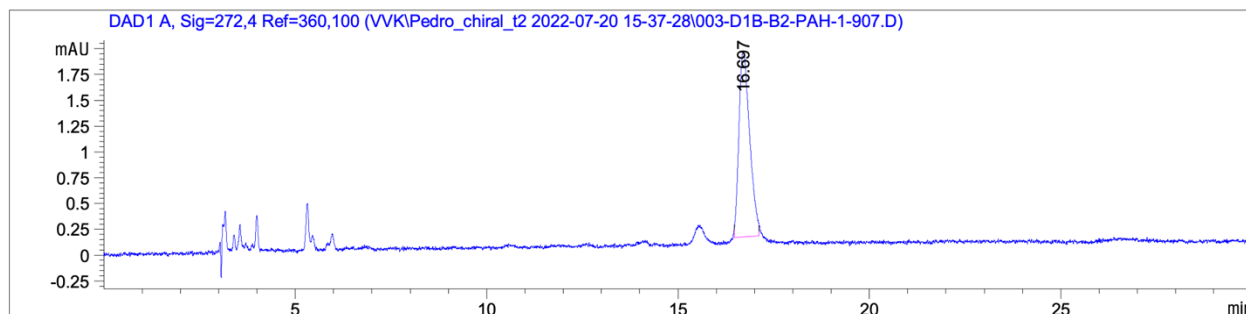

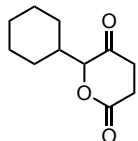

11b

7.0 mg, 36%.

**<sup>1</sup>H NMR** (500 MHz, CDCl<sub>3</sub>) δ 4.47 (d, *J* = 3.4 Hz, 1H), 2.94-2.88 (m, 1H), 2.87-2.79 (m, 1H), 2.77-2.69 (m, 1H), 2.66-2.57 (m, 1H), 2.14-2.04 (m, 1H), 1.83-1.71 (m, 2H), 1.69-1.61 (m, 2H), 1.54-1.40 (m, 2H), 1.34-1.10 (m, 4H).

**<sup>13</sup>C NMR** (125 MHz, CDCl<sub>3</sub>) δ 205.5, 170.1, 87.5, 39.9, 34.7, 29.0, 28.1, 26.3, 26.2, 25.9, 25.7.

**IR** (ATR, cm<sup>-1</sup>) 2927, 2854, 1752, 1729, 1450, 1263, 1176, 1162, 1101.

**HRMS** (APCI+) *m/z* calcd for C<sub>11</sub>H<sub>17</sub>O<sub>3</sub> [M+H]<sup>+</sup>: 197.1172; found: 197.1175.

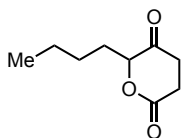

11c

6.5 mg, 38%.

**<sup>1</sup>H NMR** (500 MHz, CDCl<sub>3</sub>) δ 4.64 (dd, *J* = 8.0, 4.1 Hz, 1H), 2.97-2.83 (m, 2H), 2.79-2.60 (m, 2H), 2.01-1.91 (m, 1H), 1.86-1.75 (m, 1H), 1.52-1.26 (m, 4H), 0.91 (t, *J* = 7.3 Hz, 3H).

**<sup>13</sup>C NMR** (125 MHz, CDCl<sub>3</sub>) δ 205.5, 170.1, 83.3, 33.8, 30.5, 28.2, 26.8, 22.3, 13.8.

**IR** (ATR, cm<sup>-1</sup>) 2957, 2928, 2872, 2861, 1731, 1466, 1410, 1266, 1170, 1078.

**HRMS** (APCI+) *m/z* calcd for C<sub>9</sub>H<sub>15</sub>O<sub>3</sub> [M+H]<sup>+</sup>: 171.1015; found: 171.1017.

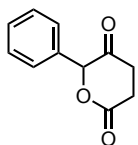

11d

10.0 mg, 52%.

**<sup>1</sup>H NMR** (500 MHz, CDCl<sub>3</sub>) δ 7.46-7.33 (m, 5H), 5.71 (s, 1H), 2.97-2.87 (m, 1H), 2.87-2.75 (m, 3H).

**<sup>13</sup>C NMR** (125 MHz, CDCl<sub>3</sub>) δ 202.8, 169.6, 133.0, 129.1, 129.1, 125.9, 84.4, 33.4, 27.9.

**IR** (ATR, cm<sup>-1</sup>) 1732, 1271, 1176, 1043.

**HRMS** (APCI+) *m/z* calcd for C<sub>11</sub>H<sub>11</sub>O<sub>3</sub> [M+H]<sup>+</sup>: 191.0702; found: 191.0705.

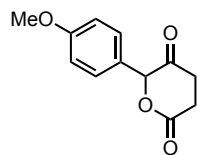

11e

9.7 mg, 44%.

**<sup>1</sup>H NMR** (500 MHz, CDCl<sub>3</sub>) δ 7.30-7.22 (m, 2H), 6.97-6.89 (m, 2H), 5.65 (s, 1H), 3.81 (s, 3H), 2.95-2.88 (m, 1H), 2.88-2.76 (m, 3H).

**<sup>13</sup>C NMR** (125 MHz, CDCl<sub>3</sub>) δ 203.2, 169.8, 160.2, 127.5, 125.0, 114.5, 84.3, 55.4, 33.4, 28.0.

**IR** (ATR, cm<sup>-1</sup>) 2961, 2922, 2852, 1733, 1614, 1520, 1461, 1270, 1257, 1175, 1027.

**HRMS** (APCI+) *m/z* calcd for C<sub>12</sub>H<sub>13</sub>O<sub>4</sub> [M+H]<sup>+</sup>: 221.0808; found: 221.0810.

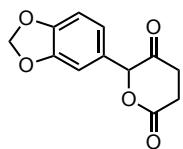

11f

10.3 mg, 44%.

**<sup>1</sup>H NMR** (500 MHz, CDCl<sub>3</sub>) δ 6.86-6.76 (m, 3H), 5.99 (s, 2H), 5.59 (s, 1H), 2.96-2.84 (m, 2H), 2.84-2.76 (m, 2H).

**<sup>13</sup>C NMR** (125 MHz, CDCl<sub>3</sub>) δ 202.9, 169.6, 148.4 (2C), 126.6, 120.0, 108.6, 106.7, 101.6, 84.2, 33.4, 28.0.

**IR** (ATR, cm<sup>-1</sup>) 2923, 1755, 1734, 1503, 1490, 1445, 1248, 1171, 1135, 1102, 1035.

**HRMS** (APCI+) *m/z* calcd for C<sub>12</sub>H<sub>11</sub>O<sub>5</sub> [M+H]<sup>+</sup>: 235.0601; found: 235.0605.

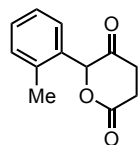

11g

13.2 mg, 64%.

**<sup>1</sup>H NMR** (500 MHz, CDCl<sub>3</sub>) δ 7.36-7.15 (m, 4H), 5.83 (s, 1H), 3.07-3.01 (m, 2H), 2.92-2.83 (m, 2H), 2.34 (s, 3H).

**<sup>13</sup>C NMR** (125 MHz, CDCl<sub>3</sub>) δ 203.8, 169.7, 137.1, 131.9, 131.2, 129.6, 127.8, 126.3, 83.3, 33.9, 28.4, 19.7.

**IR** (ATR, cm<sup>-1</sup>) 3023, 2923, 1733, 1331, 1259, 1172, 1136, 1037, 1016.



**HRMS** (APCI+)  $m/z$  calcd for  $C_{12}H_{13}O_3$   $[M+H]^+$ : 205.0859; found: 205.0862.

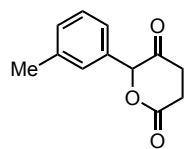

11h

11.4 mg, 56%.

**$^1H$  NMR** (500 MHz,  $CDCl_3$ )  $\delta$  7.33-7.26 (m, 1H), 7.21-7.12 (m 3H), 5.66 (s, 1H), 2.95-2.87 (m, 1H), 2.86-2.77 (m, 3H), 2.36 (s, 3H).

**$^{13}C$  NMR** (125 MHz,  $CDCl_3$ )  $\delta$  202.9, 169.8, 139.0, 132.9, 129.9, 129.0, 126.4, 122.9, 84.5, 33.4, 27.9, 21.5.

**IR** (ATR,  $cm^{-1}$ ) 2952, 2923, 2854, 1758, 1737, 1261, 1164, 1153, 1136, 1047.

**HRMS** (APCI+)  $m/z$  calcd for  $C_{12}H_{13}O_3$   $[M+H]^+$ : 205.0859; found: 205.0862.

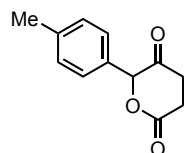

11i

10.6 mg, 52%.

**$^1H$  NMR** (500 MHz,  $CDCl_3$ )  $\delta$  7.29-7.14 (m, 4H), 5.67 (s, 1H), 2.95-2.86 (m, 1H), 2.86-2.73 (m, 3H), 2.36 (s, 3H).

**$^{13}C$  NMR** (125 MHz,  $CDCl_3$ )  $\delta$  203.0, 169.8, 139.1, 130.1, 129.8, 125.9, 84.5, 33.4, 27.9, 21.2.

**IR** (ATR,  $cm^{-1}$ ) 2955, 2921, 2853, 1732, 1266, 1177, 1131, 1039, 1020.

**HRMS** (APCI+)  $m/z$  calcd for  $C_{12}H_{13}O_3$   $[M+H]^+$ : 205.0859; found: 205.0862.

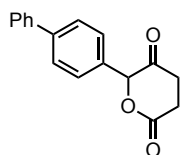

11j

14.0 mg, 53%.

**$^1H$  NMR** (500 MHz,  $CDCl_3$ )  $\delta$  7.67-7.61 (m, 2H), 7.60-7.56 (m, 2H), 7.48-7.42 (m, 4H), 7.41-7.33 (m, 1H), 5.75 (s, 1H), 2.99-2.90 (m, 1H), 2.90-2.79 (m, 3H).

**$^{13}C$  NMR** (125 MHz,  $CDCl_3$ )  $\delta$  202.8, 169.6, 142.1, 140.1, 131.9, 128.9, 127.80, 127.77, 127.2, 126.4, 84.3, 33.5, 27.9.

**IR** (ATR,  $\text{cm}^{-1}$ ) 2922, 1733, 1489, 1410, 1334, 1269, 1162, 1140, 1036, 1021.

**HRMS** (APCI+)  $m/z$  calcd for  $\text{C}_{17}\text{H}_{15}\text{O}_3$   $[\text{M}+\text{H}]^+$ : 267.1015; found: 267.1020.

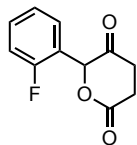

**11k**

10.0 mg, 48%.

**$^1\text{H}$  NMR** (500 MHz,  $\text{CDCl}_3$ )  $\delta$  7.45-7.36 (m, 1H), 7.32 (td,  $J = 7.4, 1.8$  Hz, 1H), 7.19 (tdd,  $J = 7.6, 3.4, 1.2$  Hz, 1H), 7.16-7.08 (m, 1H), 5.83 (s, 1H), 3.09-3.02 (m, 2H), 2.94-2.85 (m, 2H).

**$^{13}\text{C}$  NMR** (125 MHz,  $\text{CDCl}_3$ )  $\delta$  202.4, 169.2, 160.5 (d,  $J = 248.9$  Hz), 131.6 (d,  $J = 9.5$  Hz), 130.1 (d,  $J = 3.4$  Hz), 124.5 (d,  $J = 3.6$  Hz), 121.2 (d,  $J = 13.6$  Hz), 115.9 (d,  $J = 21.0$  Hz), 80.5, 33.5, 28.3.

**$^{19}\text{F}$  NMR** (470 MHz,  $\text{CDCl}_3$ )  $\delta$  -116.6.

**IR** (ATR,  $\text{cm}^{-1}$ ) 2922, 1759, 1738, 1494, 1458, 1263, 1235, 1171, 1136, 1041, 1030.

**HRMS** (APCI+)  $m/z$  calcd for  $\text{C}_{11}\text{H}_{10}\text{O}_3\text{F}$   $[\text{M}+\text{H}]^+$ : 209.0608; found: 209.0611.

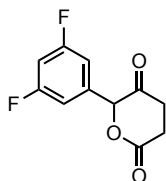

**11l**

14.2 mg, 63%.

**$^1\text{H}$  NMR** (500 MHz,  $\text{CDCl}_3$ )  $\delta$  7.00-6.91 (m, 2H), 6.84 (tt,  $J = 8.8, 2.3$  Hz, 1H), 5.66 (s, 1H), 3.03-2.91 (m, 1H), 2.90-2.76 (m, 3H).

**$^{13}\text{C}$  NMR** (125 MHz,  $\text{CDCl}_3$ )  $\delta$  201.5, 168.6, 163.3 (dd,  $J = 250.5, 12.5$  Hz), 136.4 (t,  $J = 9.4$  Hz), 109.3 (dd,  $J = 20.7, 7.2$  Hz), 104.6 (t,  $J = 25.1$  Hz), 82.9, 33.4, 27.8.

**$^{19}\text{F}$  NMR** (470 MHz,  $\text{CDCl}_3$ )  $\delta$  -108.6.

**IR** (ATR,  $\text{cm}^{-1}$ ) 2956, 2922, 2851, 1744, 1731, 1601, 1456, 1306, 1121.

**HRMS** (APCI+)  $m/z$  calcd for  $\text{C}_{11}\text{H}_9\text{O}_3\text{F}_2$   $[\text{M}+\text{H}]^+$ : 227.0514; found: 227.0519.

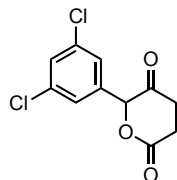

**11m**

12.9 mg, 48%.

**<sup>1</sup>H NMR** (500 MHz, CDCl<sub>3</sub>) δ 7.39-7.37 (m, 1H), 7.30-7.27 (m, 2H), 5.63 (s, 1H), 2.98 (ddd, *J* = 17.4, 9.4, 6.4 Hz, 1H), 2.93-2.88 (m, 1H), 2.87-2.77 (m, 2H).

**<sup>13</sup>C NMR** (125 MHz, CDCl<sub>3</sub>) δ 201.6, 168.7, 135.9, 135.7, 129.4, 124.7, 82.7, 33.4, 27.8.

**IR** (ATR, cm<sup>-1</sup>) 2922, 2852, 1741, 1731, 1572, 1434, 1269, 1180, 1158, 1050.

**HRMS** (APCI+) *m/z* calcd for C<sub>11</sub>H<sub>9</sub>O<sub>3</sub><sup>35</sup>Cl<sub>2</sub> [M+H]<sup>+</sup>: 258.9923; found: 258.9927.

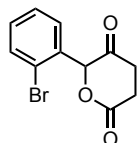

11n

16.0 mg, 60%.

**<sup>1</sup>H NMR** (500 MHz, CDCl<sub>3</sub>) δ 7.64-7.59 (m, 1H), 7.39-7.32 (m, 2H), 7.30-7.26 (m, 1H), 6.02 (s, 1H), 3.18-3.02 (m, 2H), 2.97-2.83 (m, 2H).

**<sup>13</sup>C{<sup>1</sup>H} NMR** (125 MHz, CDCl<sub>3</sub>) δ 201.9, 169.4, 133.2, 132.9, 131.0, 130.0, 127.8, 123.8, 84.1, 33.5, 28.5.

**IR** (ATR, cm<sup>-1</sup>) 2923, 1759, 1738, 1262, 1172, 1137, 1056, 1039, 1028.

**HRMS** (APCI+) *m/z* calcd for C<sub>11</sub>H<sub>10</sub>O<sub>3</sub><sup>79</sup>Br [M+H]<sup>+</sup>: 268.9807; found: 268.9812.

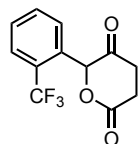

11o

16.5 mg, 64%.

**<sup>1</sup>H NMR** (500 MHz, CDCl<sub>3</sub>) δ 7.74-7.71 (m, 1H), 7.64-7.59 (m, 1H), 7.55-7.50 (m, 1H), 7.47-7.43 (m, 1H), 6.03 (s, 1H), 3.17 (ddd, *J* = 16.5, 13.8, 6.4 Hz, 1H), 3.06 (ddd, *J* = 16.5, 5.7, 2.4 Hz, 1H), 2.92 (ddd, *J* = 18.9, 6.5, 2.4 Hz, 1H), 2.81 (ddd, *J* = 19.1, 13.9, 5.7 Hz, 1H).

**<sup>13</sup>C NMR** (125 MHz, CDCl<sub>3</sub>) δ 201.9, 169.3, 132.4, 131.2, 129.9, 129.6, 128.8 (q, *J* = 30.7 Hz), 126.3 (q, *J* = 5.7 Hz), 123.9 (q, *J* = 273.9 Hz), 120.6, 80.9, 33.1, 28.5.

**<sup>19</sup>F NMR** (470 MHz, CDCl<sub>3</sub>) δ -59.1.

**IR** (ATR, cm<sup>-1</sup>) 2959, 2923, 2853, 1764, 1741, 1313, 1261, 1158, 1118, 1048, 1033.

**HRMS** (APCI+) *m/z* calcd for C<sub>12</sub>H<sub>10</sub>O<sub>3</sub>F<sub>3</sub> [M+H]<sup>+</sup>: 259.0576; found: 259.0578.

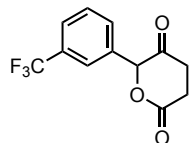

11p

10.9 mg, 42%.

**<sup>1</sup>H NMR** (500 MHz, CDCl<sub>3</sub>) δ 7.69-7.62 (m, 2H), 7.61-7.53 (m, 2H), 5.75 (s, 1H), 3.04-2.95 (m, 1H), 2.95-2.79 (m, 3H).

**<sup>13</sup>C NMR** (125 MHz, CDCl<sub>3</sub>) δ 202.1, 168.9, 133.8, 131.5 (q, *J* = 33.3 Hz), 129.7, 129.5, 126.0 (q, *J* = 5.4 Hz), 123.7 (q, *J* = 271.5 Hz), 123.2 (q, *J* = 3.7 Hz), 83.5, 33.4, 27.9.

**<sup>19</sup>F NMR** (470 MHz, CDCl<sub>3</sub>) δ -63.9.

**IR** (ATR, cm<sup>-1</sup>) 2924, 1761, 1738, 1328, 1259, 1163, 1121, 1074.

**HRMS** (APCI+) *m/z* calcd for C<sub>12</sub>H<sub>10</sub>O<sub>3</sub>F<sub>3</sub> [M+H]<sup>+</sup>: 259.0576; found: 259.0579.

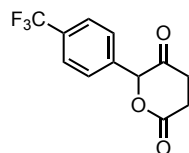

11q

18.0 mg, 70%.

**<sup>1</sup>H NMR** (500 MHz, CDCl<sub>3</sub>) δ 7.68 (d, *J* = 8.1 Hz, 2H), 7.52 (d, *J* = 8.1 Hz, 2H), 5.76 (s, 1H), 3.03-2.94 (m, 1H), 2.92-2.76 (m, 3H).

**<sup>13</sup>C NMR** (125 MHz, CDCl<sub>3</sub>) δ 202.0, 169.0, 136.6, 131.4 (q, *J* = 32.7 Hz), 126.5, 125.9 (q, *J* = 3.6 Hz), 123.7 (q, *J* = 272.5 Hz), 83.6, 33.4, 27.9

**<sup>19</sup>F NMR** (470 MHz, CDCl<sub>3</sub>) δ -64.0.

**IR** (ATR, cm<sup>-1</sup>) 2920, 1736, 1330, 1272, 1180, 1159, 1110, 1068, 1047.

**HRMS** (APCI+) *m/z* calcd for C<sub>12</sub>H<sub>10</sub>O<sub>3</sub>F<sub>3</sub> [M+H]<sup>+</sup>: 259.0576; found: 259.0580.

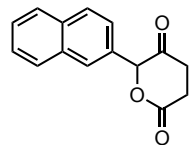

11r

15.3 mg, 64%.

**<sup>1</sup>H NMR** (500 MHz, CDCl<sub>3</sub>) δ 7.93-7.78 (m, 4H), 7.56-7.43 (m, 3H), 5.87 (s, 1H), 3.00-2.79 (m, 4H).

$^{13}\text{C}$  NMR (125 MHz,  $\text{CDCl}_3$ )  $\delta$  202.8, 169.7, 133.3, 133.0, 130.3, 129.2, 128.2, 127.8, 127.0, 126.9, 125.2, 123.1, 84.6, 33.5, 27.9.

IR (ATR,  $\text{cm}^{-1}$ ) 2922, 1756, 1735, 1261, 1170, 1156, 1123, 1039.

HRMS (APCI+)  $m/z$  calcd for  $\text{C}_{15}\text{H}_{13}\text{O}_3$   $[\text{M}+\text{H}]^+$ : 241.0859; found: 241.0864.

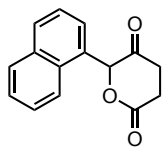

11s

9.2 mg, 38%.

$^1\text{H}$  NMR (500 MHz,  $\text{CDCl}_3$ )  $\delta$  7.94-7.84 (m, 3H), 7.59-7.51 (m, 2H), 7.47 (t,  $J = 7.7$  Hz, 1H), 7.42 (t,  $J = 7.1$  Hz, 1H), 6.31 (s, 1H), 3.12-3.06 (m, 2H), 3.06-2.90 (m, 2H).

$^{13}\text{C}$  NMR (125 MHz,  $\text{CDCl}_3$ )  $\delta$  203.5, 169.6, 134.1, 130.9, 130.6, 129.4, 129.0, 127.1, 126.3 (2C), 124.9, 123.8, 83.4, 33.9, 28.4.

IR (ATR,  $\text{cm}^{-1}$ ) 3052, 2923, 1735, 1260, 1164, 1137, 1030.

HRMS (APCI+)  $m/z$  calcd for  $\text{C}_{15}\text{H}_{13}\text{O}_3$   $[\text{M}+\text{H}]^+$ : 241.0859; found: 241.0860.

### Representative procedure for the copper-catalyzed ring opening cyclizations:

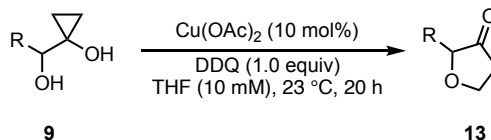

To a flame dried vial under argon was added  $\alpha$ -hydroxycyclopropanol **9** (1.0 equiv, 0.1 mmol), followed by  $\text{Cu}(\text{OAc})_2$  (0.1 equiv, 0.01 mmol, 1.83 mg) and DDQ (1.0 equiv, 0.1 mmol, 22.7 mg). The mixture was then dissolved in THF (0.01 M, 10 mL). The reaction was then stirred for 20 h at room temperature. After completion the mixture was filtered through a short pad of celite, then quenched with DI water (50 mL), and diluted with EtOAc (50 mL). The aqueous phase was washed three times with EtOAc (20 mL). The organic phases were combined and washed with brine (50 mL). The organic phase was then dried over  $\text{Na}_2\text{SO}_4$ , filtered, and concentrated under reduced pressure. The resulting crude residue was then dissolved in  $\text{CHCl}_3$  and filtered, once again, through a pad of celite to give the crude product, which was purified by column chromatography to afford 3-furanone **13**.

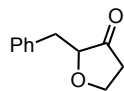

**13a**

16.4 mg, 93%; 788 mg, 80% (1.0 gram scale).

<sup>1</sup>H NMR (500 MHz, CDCl<sub>3</sub>) δ 7.32-7.27 (m, 2H), 7.26-7.21 (m, 3H), 4.18-4.23 (m, 1H), 4.05-3.97 (m, 1H), 3.98 (dd, *J* = 7.8, 3.7 Hz, 1H), 3.08 (dd, *J* = 14.5, 3.8 Hz, 1H), 2.86 (dd, *J* = 14.5, 7.7 Hz, 1H), 2.46 (ddd, *J* = 18.1, 7.1, 4.0 Hz, 1H), 2.36-2.29 (m, 1H).

<sup>13</sup>C NMR (125 MHz, CDCl<sub>3</sub>) δ 215.5, 137.1, 129.4, 128.4, 126.7, 80.6, 64.5, 37.0, 36.9.

IR (ATR, cm<sup>-1</sup>) 3029, 2920, 2874, 1753, 1496, 1454, 1403, 1146, 1075, 994.

HRMS (APCI+) *m/z* calcd for C<sub>11</sub>H<sub>13</sub>O<sub>2</sub> [M+H]<sup>+</sup>: 177.0910; found: 177.0909.

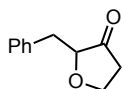

**13a** (80%, 94% ee)

AMY1\_5%MeOH\_IPA\_0.2% Formic Acid\_2.5mL/min\_5min

| Racemic 13a |          |              |         |
|-------------|----------|--------------|---------|
|             | RT (min) | Area (mAU*s) | % Area  |
| 1           | 0.84     | 65478.05     | 43.7700 |
| 2           | 16.766   | 84107.47     | 56.2300 |

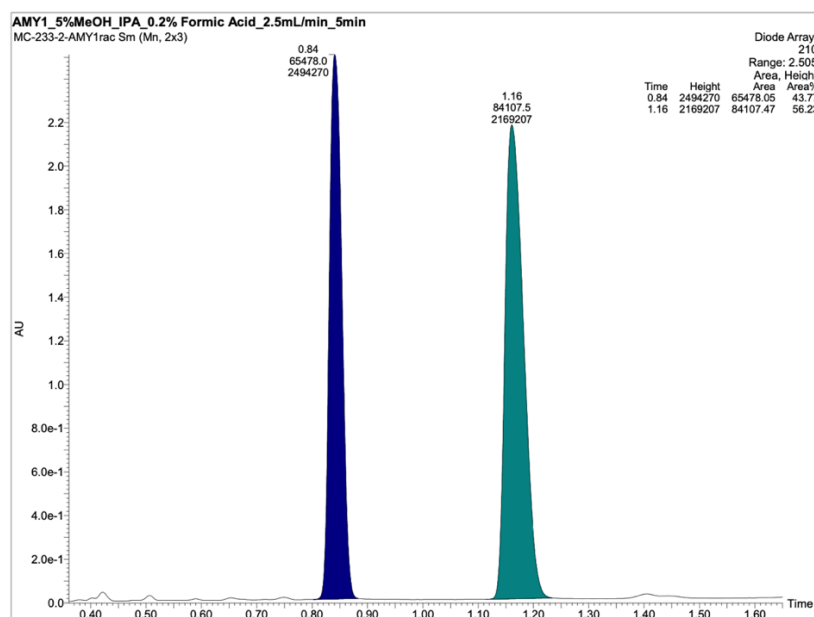

| Enantio-enriched 13a |          |              |         |
|----------------------|----------|--------------|---------|
|                      | RT (min) | Area (mAU*s) | % Area  |
| 1                    | 0.86     | 2854.27      | 3.1900  |
| 2                    | 1.20     | 86629.73     | 96.8100 |

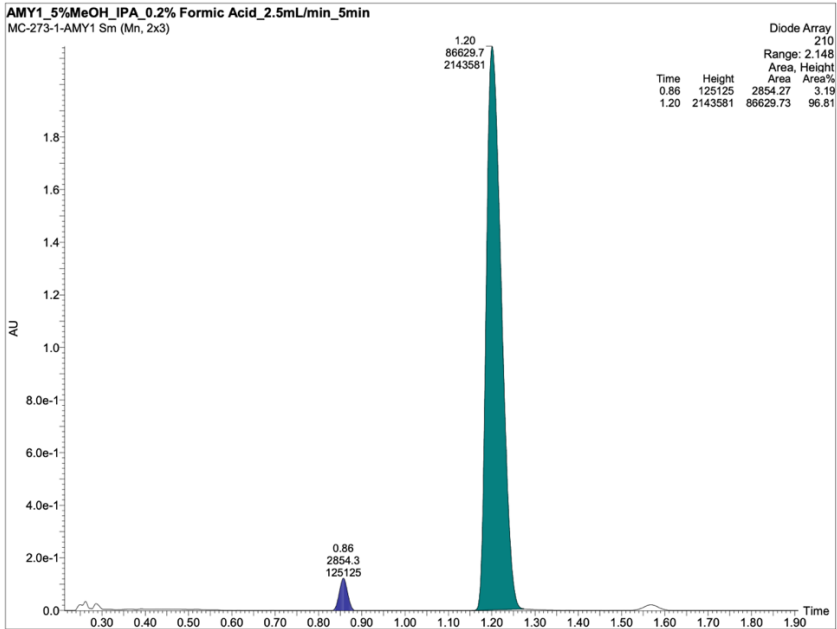

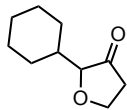

13b

13.5 mg, 80%.

**<sup>1</sup>H NMR** (400 MHz, CDCl<sub>3</sub>) δ 4.29 (m, 1H), 4.08-4.00 (m, 1H), 3.53 (d, *J* = 3.9 Hz, 1H), 2.52-2.37 (m, 2H), 1.80-1.70 (m, 4H), 1.67-1.61 (m, 1H), 1.52-1.46 (m, 1H), 1.32-1.11 (m, 5H).

**<sup>13</sup>C NMR** (125 MHz, CDCl<sub>3</sub>) δ 216.5, 83.7, 64.5, 39.8, 38.0, 29.3, 27.1, 26.3, 26.1, 26.0.

**IR** (ATR, cm<sup>-1</sup>) 2925, 2853, 1753, 1450, 1404, 1158, 1139, 1028.

**HRMS** (APCI+) *m/z* calcd for C<sub>10</sub>H<sub>17</sub>O<sub>2</sub> [M+H]<sup>+</sup>: 169.1223; found: 169.1223.

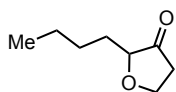

13c

5.0 mg, 35%.

**<sup>1</sup>H NMR** (500 MHz, CDCl<sub>3</sub>) δ 4.32-4.28 (m, 1H), 4.08-4.02 (m, 1H), 3.69 (dd, *J* = 7.9, 4.2 Hz, 1H), 2.52-2.43 (m, 2H), 1.77-1.67 (m, 1H), 1.61-1.50 (m, 2H), 1.50-1.27 (m, 3H), 0.90 (t, *J* = 7.1 Hz, 3H).

**<sup>13</sup>C NMR** (125 MHz, CDCl<sub>3</sub>) δ 216.4, 80.0, 64.3, 37.1, 30.3, 27.5, 22.5, 13.9.

**IR** (ATR, cm<sup>-1</sup>) 2957, 2930, 2861, 2360, 2341, 1756, 1728, 1466, 1286, 1159, 1128, 1088, 1037.

**HRMS** (APCI+) *m/z* calcd for C<sub>8</sub>H<sub>15</sub>O<sub>2</sub> [M+H]<sup>+</sup>: 143.1066; found: 143.1067.

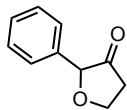

13d

13.0 mg, 80%.

**<sup>1</sup>H NMR** (400 MHz, CDCl<sub>3</sub>) δ 7.43-7.30 (m, 5H), 4.75 (s, 1H), 4.50 (ddd, *J* = 9.4, 7.2, 6.3 Hz, 1H), 4.30 (m, 1H), 2.65-2.61 (m, 2H).

**<sup>13</sup>C NMR** (125 MHz, CDCl<sub>3</sub>) δ 213.0, 135.6, 128.6, 128.2, 126.0, 80.9, 64.8, 36.6.

**IR** (ATR, cm<sup>-1</sup>) 3062, 3032, 2917, 2876, 1755, 1719, 1494, 1452, 1403, 1142, 1055, 987.

**HRMS** (APCI+) *m/z* calcd for C<sub>10</sub>H<sub>11</sub>O<sub>2</sub> [M+H]<sup>+</sup>: 163.0753; found: 163.0756.



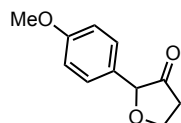

13e

11.3 mg, 59%.

**<sup>1</sup>H NMR** (500 MHz, CDCl<sub>3</sub>) δ 7.33-7.29 (m, 2H), 6.93-6.88 (m, 2H), 4.69 (s, 1H), 4.51-4.43 (m, 1H), 4.25 (ddd, *J* = 9.4, 8.4, 7.5 Hz, 1H), 3.80 (s, 3H), 2.71-2.55 (m, 2H).

**<sup>13</sup>C NMR** (125 MHz, CDCl<sub>3</sub>) δ 213.5, 159.6, 127.8, 127.5, 114.1, 80.8, 64.6, 55.3, 36.7.

**IR** (ATR, cm<sup>-1</sup>) 3001, 2958, 2926, 2838, 1779, 1677, 1600, 1577, 1512, 1463, 1247, 1177, 1071, 1031.

**HRMS** (APCI+) *m/z* calcd for C<sub>11</sub>H<sub>13</sub>O<sub>3</sub> [M+H]<sup>+</sup>: 193.0859; found: 193.0859.

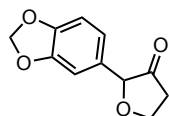

13f

19.2 mg, 93%.

**<sup>1</sup>H NMR** (400 MHz, CDCl<sub>3</sub>) δ 6.87-6.85 (m, 2H), 6.81-6.79 (m, 1H), 5.95 (d, *J* = 0.7 Hz, 2H), 4.64 (s, 1H), 4.50-4.41 (m, 1H), 4.27-4.21 (m, 1H), 2.64-2.60 (m, 2H).

**<sup>13</sup>C NMR** (125 MHz, CDCl<sub>3</sub>) δ 213.1, 148.0, 147.6, 129.4, 119.8, 108.4, 106.7, 101.2, 80.9, 64.7, 36.5.

**IR** (ATR, cm<sup>-1</sup>) 2916, 2850, 1753, 1503, 1487, 1442, 1402, 1239, 1144, 1099, 1034, 926.

**HRMS** (APCI+) *m/z* calcd for C<sub>11</sub>H<sub>11</sub>O<sub>4</sub> [M+H]<sup>+</sup>: 207.0651; found: 207.0651.

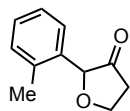

13g

13.2 mg, 75%.

**<sup>1</sup>H NMR** (500 MHz, CDCl<sub>3</sub>) δ 7.32-7.27 (m, 1H), 7.24-7.16 (m, 3H), 4.96 (s, 1H), 4.55 (m, 1H), 4.25 (m, 1H), 2.73 (m, 1H), 2.62 (m, 1H), 2.42 (s, 3H).

**<sup>13</sup>C NMR** (125 MHz, CDCl<sub>3</sub>) δ 213.5, 136.6, 134.4, 130.8, 128.3, 126.5, 126.0, 79.9, 64.7, 37.0, 19.6.

**IR** (ATR, cm<sup>-1</sup>) 3023, 2955, 2921, 2871, 1753, 1490, 1462, 1403, 1216, 1140, 1050, 1037, 986.

**HRMS** (APCI+) *m/z* calcd for C<sub>11</sub>H<sub>13</sub>O<sub>2</sub> [M+H]<sup>+</sup>: 177.0910; found: 177.0909.

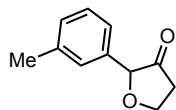

13h

14.6 mg, 83%.

**<sup>1</sup>H NMR** (400 MHz, CDCl<sub>3</sub>) δ 7.29-7.19 (m, 3H), 7.14-7.12 (m, 1H), 4.71 (s, 1H), 4.52-4.47 (m, 1H), 4.30-4.24 (m, 1H), 2.65-2.61 (m, 2H), 2.36 (s, 3H).

**<sup>13</sup>C{<sup>1</sup>H} NMR** (100 MHz, CDCl<sub>3</sub>) δ 213.2, 138.3, 135.6, 129.0, 128.5, 126.7, 123.2, 81.0, 64.8, 36.6, 21.5.

**IR** (ATR, cm<sup>-1</sup>) 2956, 2923, 2870, 1756, 1720, 1607, 1489, 1461, 1403, 1278, 1140, 1054, 985.

**HRMS** (APCI+) *m/z* calcd for C<sub>11</sub>H<sub>13</sub>O<sub>2</sub> [M+H]<sup>+</sup>: 177.0910; found: 177.0909.

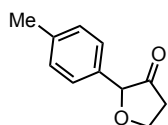

13i

12.4 mg, 70%.

**<sup>1</sup>H NMR** (500 MHz, CDCl<sub>3</sub>) δ 7.30-7.26 (m, 2H), 7.20-7.16 (m, 2H), 4.71 (s, 1H), 4.52-4.44 (m, 1H), 4.27 (m, 1H), 2.65-2.58 (m, 2H), 2.34 (s, 3H).

**<sup>13</sup>C NMR** (125 MHz, CDCl<sub>3</sub>) δ 213.3, 138.0, 132.7, 129.3, 126.0, 81.0, 64.7, 36.6, 21.2.

**IR** (ATR, cm<sup>-1</sup>) 2922, 2879, 2360, 1759, 1449, 1328, 1163, 1121, 1073.

**HRMS** (APCI+) *m/z* calcd for C<sub>11</sub>H<sub>13</sub>O<sub>2</sub> [M+H]<sup>+</sup>: 177.0910; found: 177.0910.

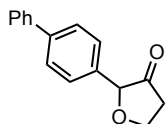

13j

19.3 mg, 81%.

**<sup>1</sup>H NMR** (400 MHz, CDCl<sub>3</sub>) δ 7.62-7.56 (m, 4H), 7.50-7.42 (m, 4H), 7.37-7.33 (m, 1H), 4.80 (s, 1H), 4.56-4.50 (m, 1H), 4.34 (m, 1H), 2.68-2.64 (m, 2H).

**<sup>13</sup>C NMR** (125 MHz, CDCl<sub>3</sub>) δ 213.1, 141.2, 140.7, 134.6, 128.8, 127.4, 127.4, 127.2, 126.4, 80.8, 64.9, 36.6.

**IR** (ATR, cm<sup>-1</sup>) 3055, 3030, 2918, 2870, 1755, 1487, 1402, 1141, 1050, 1007.

**HRMS** (APCI+) *m/z* calcd for C<sub>16</sub>H<sub>15</sub>O<sub>2</sub> [M+H]<sup>+</sup>: 239.1066; found: 239.1063.

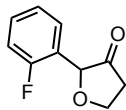

13k

12.1 mg, 67%.

**<sup>1</sup>H NMR** (400 MHz, CDCl<sub>3</sub>) δ 7.35-7.30 (m, 2H), 7.17-7.06 (m, 2H), 4.90 (s, 1H), 4.87 (m, 1H), 4.57-4.51 (m, 1H), 4.29-4.22 (m, 1H), 2.83-2.74 (m, 1H), 2.68-2.61 (m, 1H).

**<sup>13</sup>C NMR** (125 MHz, CDCl<sub>3</sub>) δ 212.8, 160.8 (d, *J* = 248.2 Hz), 130.6 (d, *J* = 8.6 Hz), 129.8 (d, *J* = 4.7 Hz), 124.3 (d, *J* = 3.0 Hz), 123.8 (d, *J* = 13.8 Hz), 115.9 (d, *J* = 21.4 Hz), 77.7, 65.2, 36.7.

**<sup>19</sup>F NMR** (470 MHz, CDCl<sub>3</sub>) δ -117.3.

**IR** (ATR, cm<sup>-1</sup>) 2922, 2876, 1758, 1617, 1587, 1492, 1457, 1403, 1233, 1143, 1052, 1030, 986.

**HRMS** (APCI+) *m/z* calcd for C<sub>10</sub>H<sub>10</sub>O<sub>2</sub>F [M+H]<sup>+</sup> = 181.0659; found 181.0660.

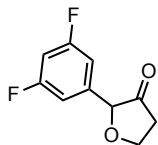

13l

14.5 mg, 73%, 36 h.

**<sup>1</sup>H NMR** (400 MHz, CDCl<sub>3</sub>) δ 7.04-7.00 (m, 2H), 6.79-6.74 (m, 1H), 4.72 (s, 1H), 4.53-4.47 (m, 1H), 4.35-4.26 (m, 1H), 2.69-2.62 (m, 2H).

**<sup>13</sup>C NMR** (100 MHz, CDCl<sub>3</sub>) δ 211.3, 163.1 (dd, *J* = 249.0, 12.6 Hz), 139.3 (t, *J* = 9.2 Hz), 108.7 (dd, *J* = 20.5, 6.4 Hz), 103.5 (t, *J* = 25.6 Hz), 79.5 (t, *J* = 2.4 Hz), 64.9, 36.2.

**<sup>19</sup>F NMR** (376 MHz, CDCl<sub>3</sub>) δ -109.1.

**IR** (ATR, cm<sup>-1</sup>) 3092, 2887, 1759, 1728, 1624, 1596, 1443, 1326, 1228, 1137, 1118, 986.

**HRMS** (APCI+) *m/z* calcd for C<sub>10</sub>H<sub>9</sub>O<sub>2</sub>F<sub>2</sub> [M+H]<sup>+</sup>: 199.0565; found: 199.0565.

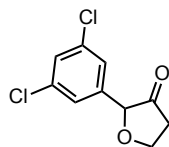

13m

13.4 mg, 58%, 36 h.

**<sup>1</sup>H NMR** (400 MHz, CDCl<sub>3</sub>) δ 7.34-7.22 (m, 3H), 4.67 (s, 1H), 4.52-4.46 (m, 1H), 4.33-4.26 (m, 1H), 2.65-2.61 (m, 2H).

**<sup>13</sup>C NMR** (100 MHz, CDCl<sub>3</sub>) δ 211.4, 138.7, 135.2, 128.3, 124.2, 79.4, 65.0, 36.3.

**IR** (ATR,  $\text{cm}^{-1}$ ) 3080, 2992, 2919, 2879, 1759, 1587 1569, 1427, 1402, 1204, 1139, 1102, 1070, 989.

**HRMS** (APCI+)  $m/z$  calcd for  $\text{C}_{10}\text{H}_9\text{O}_2^{35}\text{Cl}_2$   $[\text{M}+\text{H}]^+$ : 230.9974; found: 230.9978.

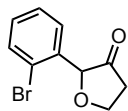

**13n**

18.8 mg, 78%.

**$^1\text{H}$  NMR** (500 MHz,  $\text{CDCl}_3$ )  $\delta$  7.62-7.57 (m, 1H), 7.35-7.27 (m, 2H), 7.21-7.17 (m, 1H), 5.13 (s, 1H), 4.59-4.54 (m, 1H), 4.30-4.24 (m, 1H), 2.80-2.73 (m, 1H), 2.68-2.62 (m, 1H).

**$^{13}\text{C}$  NMR** (125 MHz,  $\text{CDCl}_3$ )  $\delta$  211.8, 135.5, 133.3, 130.0, 128.9, 127.6, 123.5, 81.5, 64.9, 36.9.

**IR** (ATR,  $\text{cm}^{-1}$ ) 3064, 2920, 2874, 2359, 2337, 1757, 1472, 1439, 1402, 1137, 1063, 1023, 988.

**HRMS** (APCI+)  $m/z$  calcd for  $\text{C}_{10}\text{H}_{10}\text{O}_2^{79}\text{Br}$   $[\text{M}+\text{H}]^+$ : 240.9858; found: 240.9856.

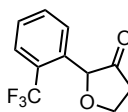

**13o**

16.6 mg, 72%.

**$^1\text{H}$  NMR** (400 MHz,  $\text{CDCl}_3$ )  $\delta$  7.72-7.69 (m, 1H), 7.57-7.54 (m, 1H), 7.46-7.42 (m, 2H), 5.03 (s, 1H), 4.60-4.54 (m, 1H), 4.28-4.22 (m, 1H), 2.80-2.63 (m, 2H).

**$^{13}\text{C}$  NMR** (125 MHz,  $\text{CDCl}_3$ )  $\delta$  211.7, 134.7, 132.1, 129.3 (q,  $J = 31.3$  Hz), 129.0, 128.6, 126.3 (q,  $J = 6.3$  Hz), 124.0 (q,  $J = 272.5$  Hz), 78.6, 64.8, 36.8.

**$^{19}\text{F}$  NMR** (470 MHz,  $\text{CDCl}_3$ )  $\delta$  -58.8.

**IR** (ATR,  $\text{cm}^{-1}$ ) 2920, 2850, 1759, 1587, 1455, 1405, 1310, 1275, 1203, 1159, 1109, 1048, 1033.

**HRMS** (APCI+)  $m/z$  calcd for  $\text{C}_{11}\text{H}_{10}\text{O}_2\text{F}_3$   $[\text{M}+\text{H}]^+$ : 231.0627; found: 231.0625.

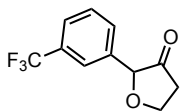

**13p**

17.0 mg, 74%.

**$^1\text{H}$  NMR** (400 MHz,  $\text{CDCl}_3$ )  $\delta$  7.72-7.72 (m, 1H), 7.64-7.56 (m, 2H), 7.52-7.48 (m, 1H), 4.78 (s, 1H), 4.55-4.50 (m, 1H), 4.35-4.28 (m, 1H), 2.67-2.63 (m, 2H).

**$^{13}\text{C}$  NMR** (125 MHz,  $\text{CDCl}_3$ )  $\delta$  212.0, 136.5, 131.0 (q,  $J = 32.5$  Hz), 129.3, 129.0, 124.9 (q,  $J = 3.7$  Hz), 124.0 (q,  $J = 271.3$  Hz), 122.5 (q,  $J = 3.61$  Hz), 80.1, 64.9, 36.4.

**<sup>19</sup>F NMR** (470 MHz, CDCl<sub>3</sub>) δ -63.8.

**IR** (ATR, cm<sup>-1</sup>) 2951, 2920, 2872, 2360, 1757, 1514, 1404, 1143, 1057, 1020, 985.

**HRMS** (APCI+) *m/z* calcd for C<sub>11</sub>H<sub>10</sub>O<sub>2</sub>F<sub>3</sub> [M+H]<sup>+</sup>: 231.0627; found: 231.0626.

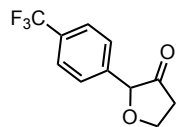

**13q**

13.1 mg, 57%.

**<sup>1</sup>H NMR** (400 MHz, CDCl<sub>3</sub>) δ 7.65-7.62 (m, 2H), 7.58-7.56 (m, 2H), 4.80 (s, 1H), 4.55-4.49 (m, 1H), 4.35-4.29 (m, 1H), 2.66-2.62 (m, 2H).

**<sup>13</sup>C NMR** (125 MHz, CDCl<sub>3</sub>) δ 211.9, 139.4, 130.3 (q, *J* = 32.5 Hz), 126.0, 125.4 (q, *J* = 3.8 Hz), 124.1 (q, *J* = 271.3 Hz), 80.2, 64.9, 36.4.

**<sup>19</sup>F NMR** (470 MHz, CDCl<sub>3</sub>) δ -63.8.

**IR** (ATR, cm<sup>-1</sup>) 2917, 2882, 1760, 1619, 1415, 1323, 1162, 1120, 1110, 1066, 1017.

**HRMS** (APCI+) *m/z* calcd for C<sub>11</sub>H<sub>10</sub>O<sub>2</sub>F<sub>3</sub> [M+H]<sup>+</sup>: 231.0627; found: 231.0629.

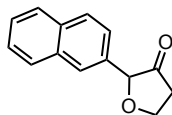

**13r**

17.2 mg, 81%.

**<sup>1</sup>H NMR** (400 MHz, CDCl<sub>3</sub>) δ 7.89-7.82 (m, 4H), 7.54-7.46 (m, 3H), 4.92 (s, 1H), 4.60-4.54 (m, 1H), 4.38-4.32 (m, 1H), 2.70-2.66 (m, 2H).

**<sup>13</sup>C NMR** (125 MHz, CDCl<sub>3</sub>) δ 213.0, 133.2, 133.0, 128.5, 128.1, 127.8 (2C), 126.3, 126.2, 125.1, 123.7, 81.0, 64.9, 36.6.

**IR** (ATR, cm<sup>-1</sup>) 3056, 2919, 2973, 1756, 1507, 1402, 1142, 1123, 1057.

**HRMS** (APCI+) *m/z* calcd for C<sub>14</sub>H<sub>13</sub>O<sub>2</sub> [M+H]<sup>+</sup>: 213.0910; found: 213.0905

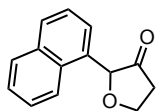

**13s**

13.4 mg, 63%.

**<sup>1</sup>H NMR** (400 MHz, CDCl<sub>3</sub>) δ 8.12-8.09 (m, 1H), 7.89-7.82 (m, 2H), 7.58-7.44 (m, 4H), 5.51 (s, 1H), 4.64-4.59 (m, 1H), 4.41-4.34 (m, 1H), 2.88-4.29 (m, 1H), 2.75-2.68 (m, 1H).

<sup>13</sup>C NMR (125 MHz, CDCl<sub>3</sub>) δ 212.9, 134.0, 131.7, 131.2, 129.1, 128.7, 126.4, 125.9, 125.1, 124.3, 124.2, 79.4, 64.9, 37.0.

IR (ATR, cm<sup>-1</sup>) 3050, 2921, 1752, 1714, 1595, 1510, 1398, 1243, 1138, 1087.

HRMS (APCI+) *m/z* calcd for C<sub>14</sub>H<sub>13</sub>O<sub>2</sub> [M+H]<sup>+</sup>: 213.0910; found: 213.0909.

## Part 2: References

- 1) F. Scheidt, M. Schäfer, J. C. Sarie, C. G. Daniliuc, J. J. Molloy, R. Gilmour, *Angew. Chem. Int. Ed.*, 2018, **57**, 16431-16435.
- 2) K. Ma, X. Yin, M. Dai, *Angew. Chem. Int. Ed.*, 2018, **57**, 15209–15212.
- 3) J. A. Malone, K. Cariou, A. J. Frontier, *J. Am. Chem. Soc.*, 2009, **131**, 7560-7561.
- 4) M. Podunavac, J. J. Lacharity, K. E. Jones, A. Zakarian, *Org. Lett.*, 2018, **20**, 4867-4870.

### Part 3: $^1\text{H}$ , $^{13}\text{C}$ , and $^{19}\text{F}$ NMR spectra

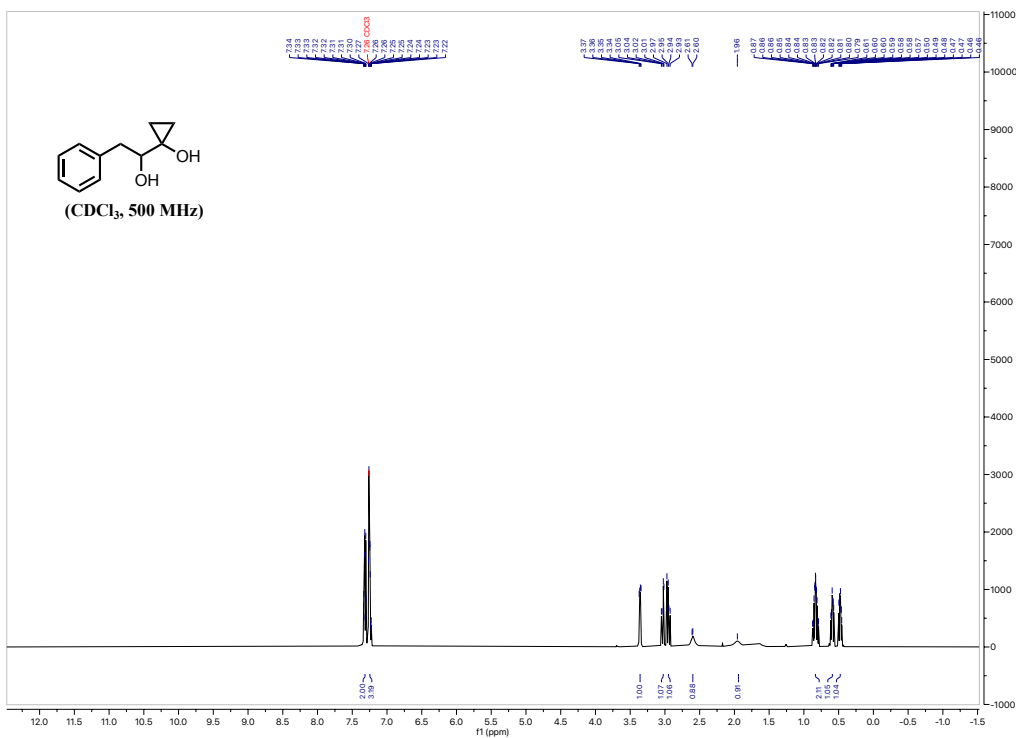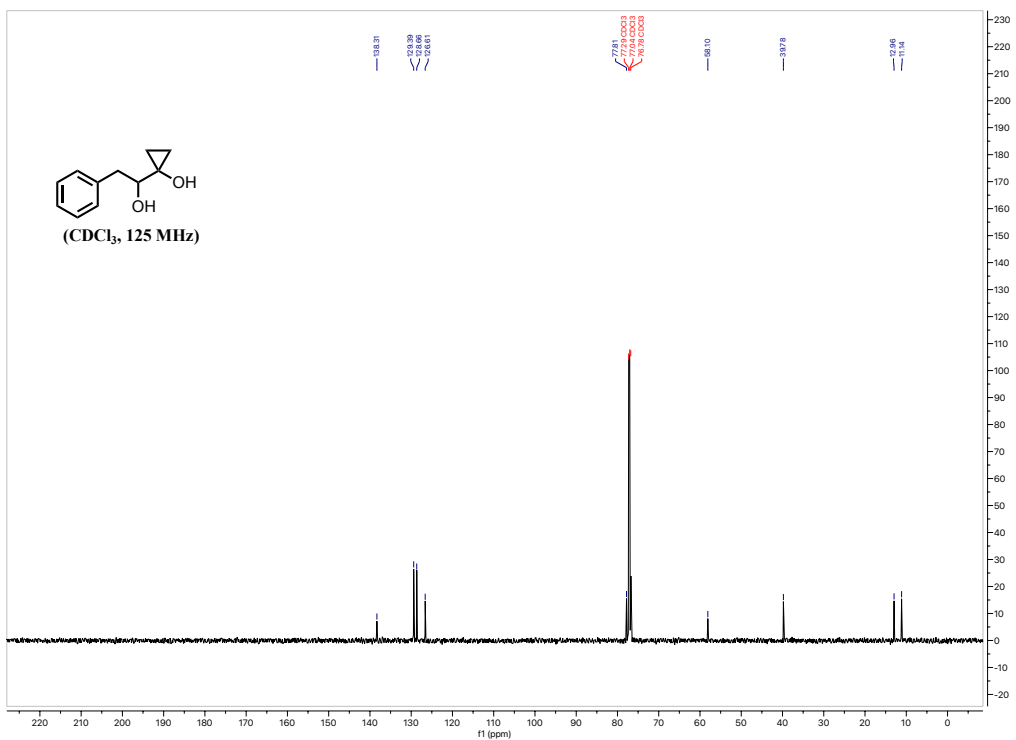





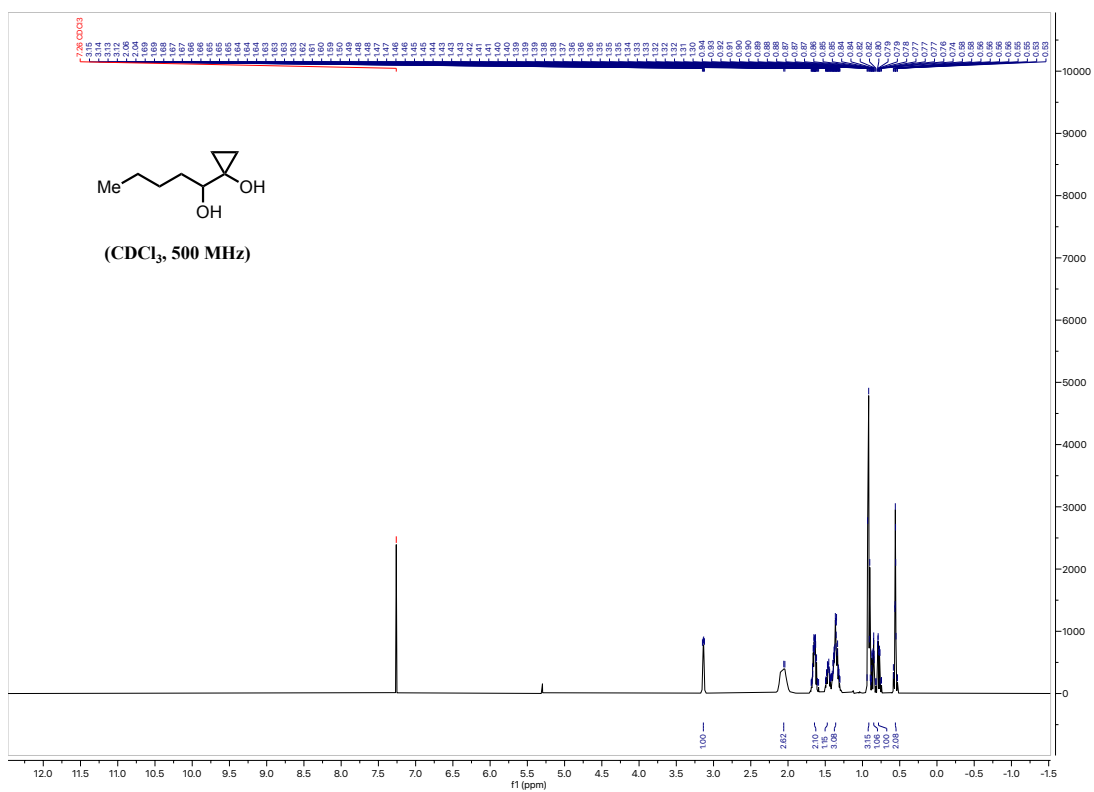



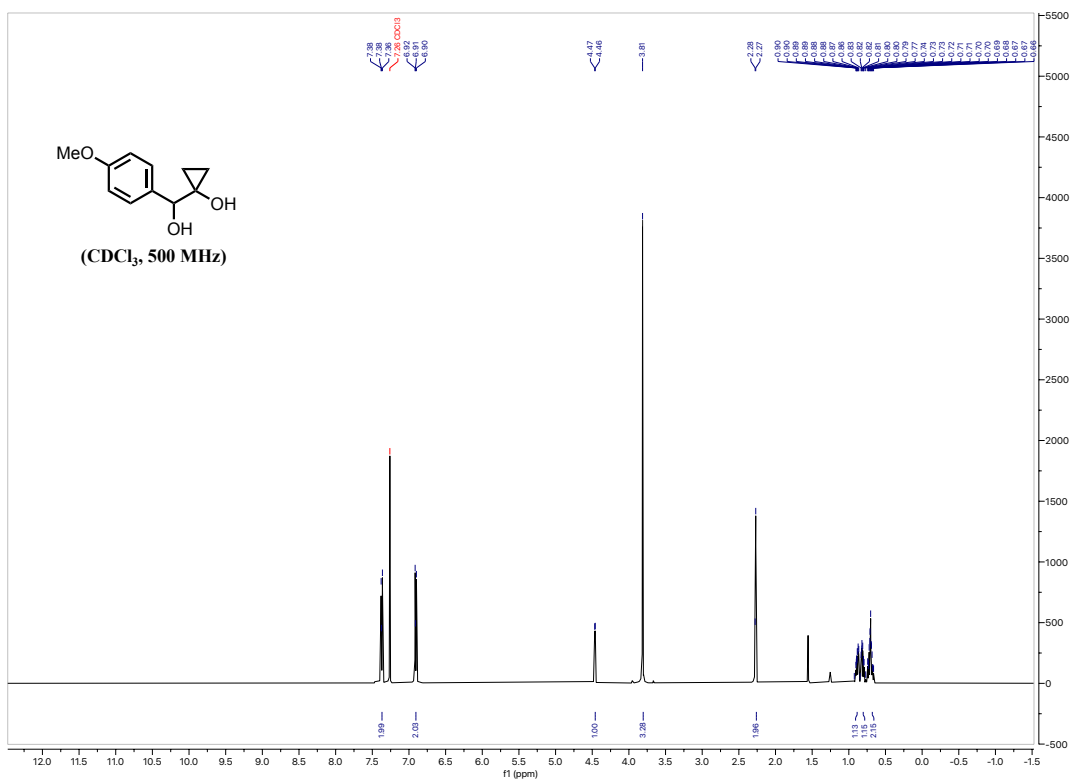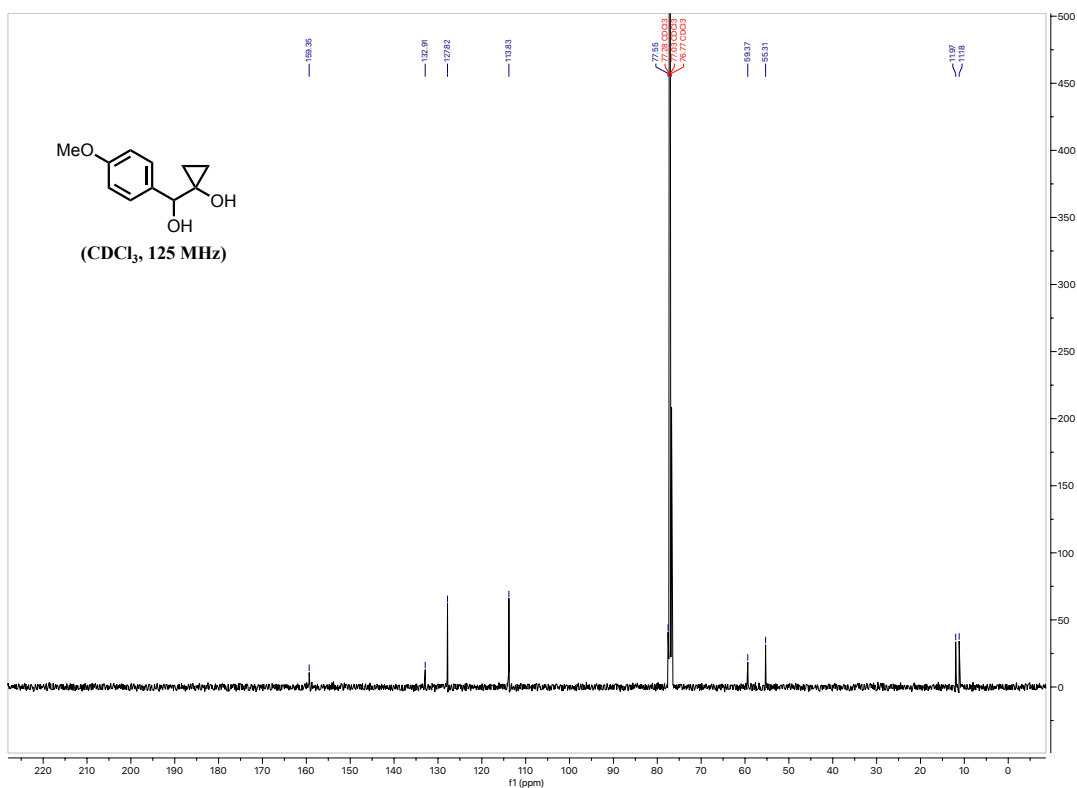



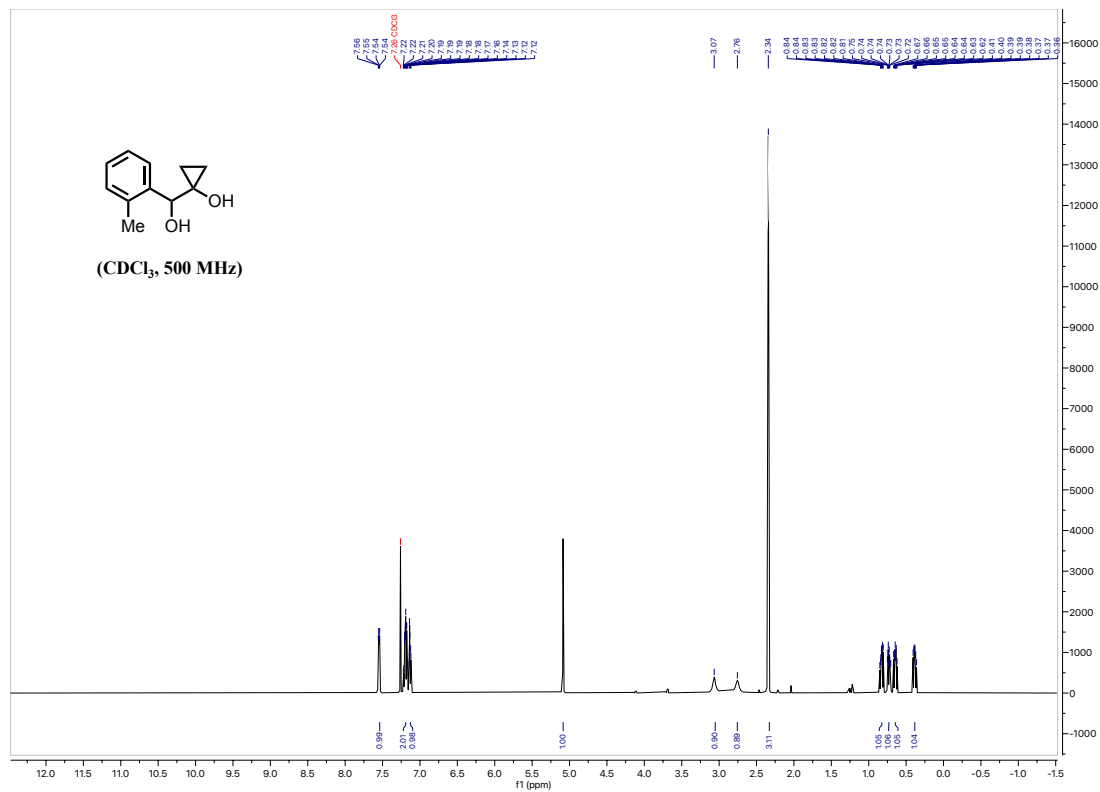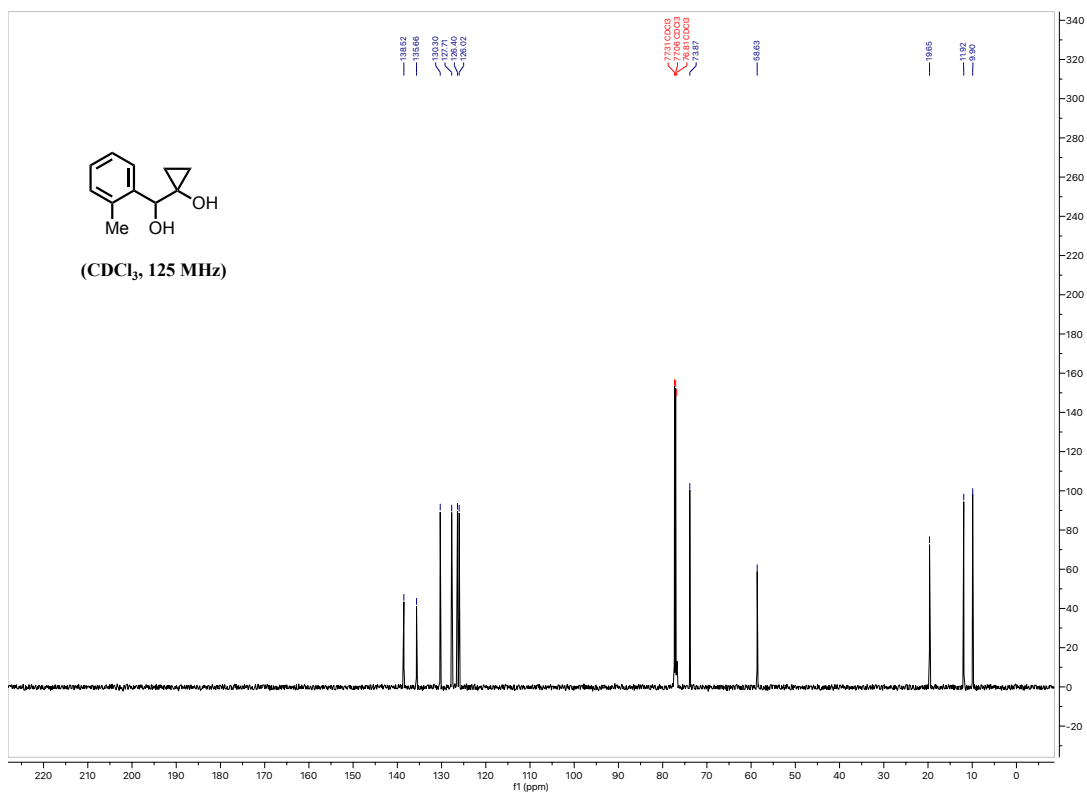

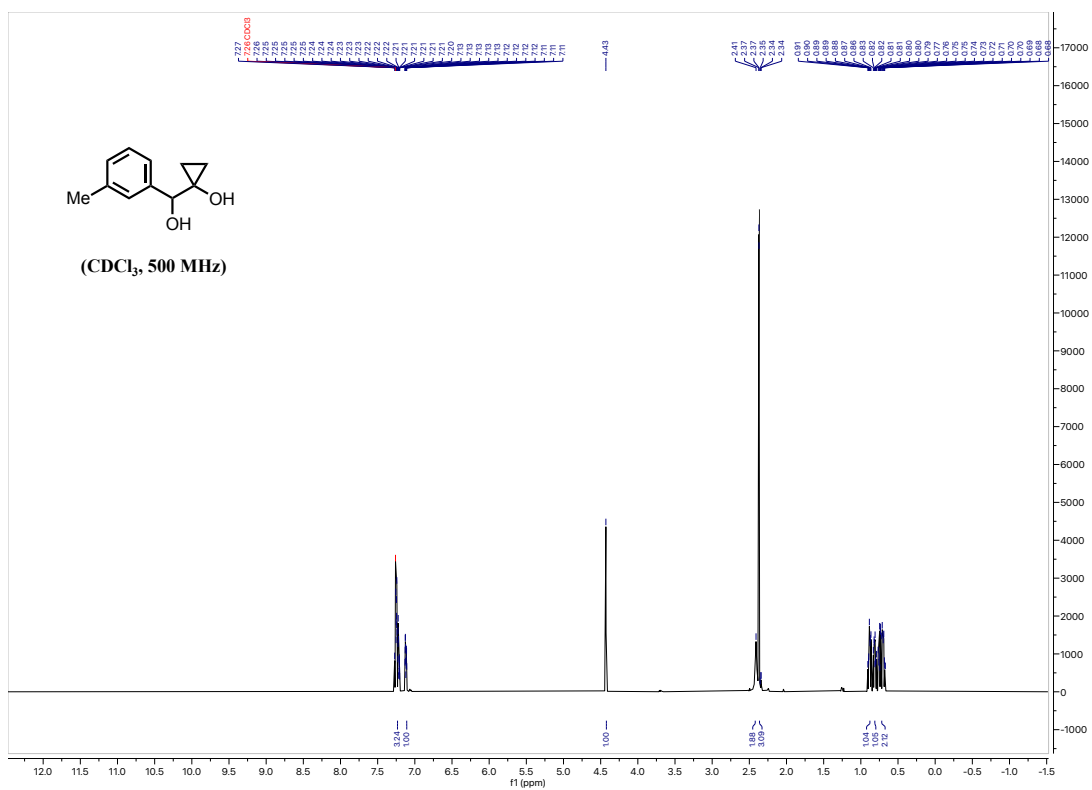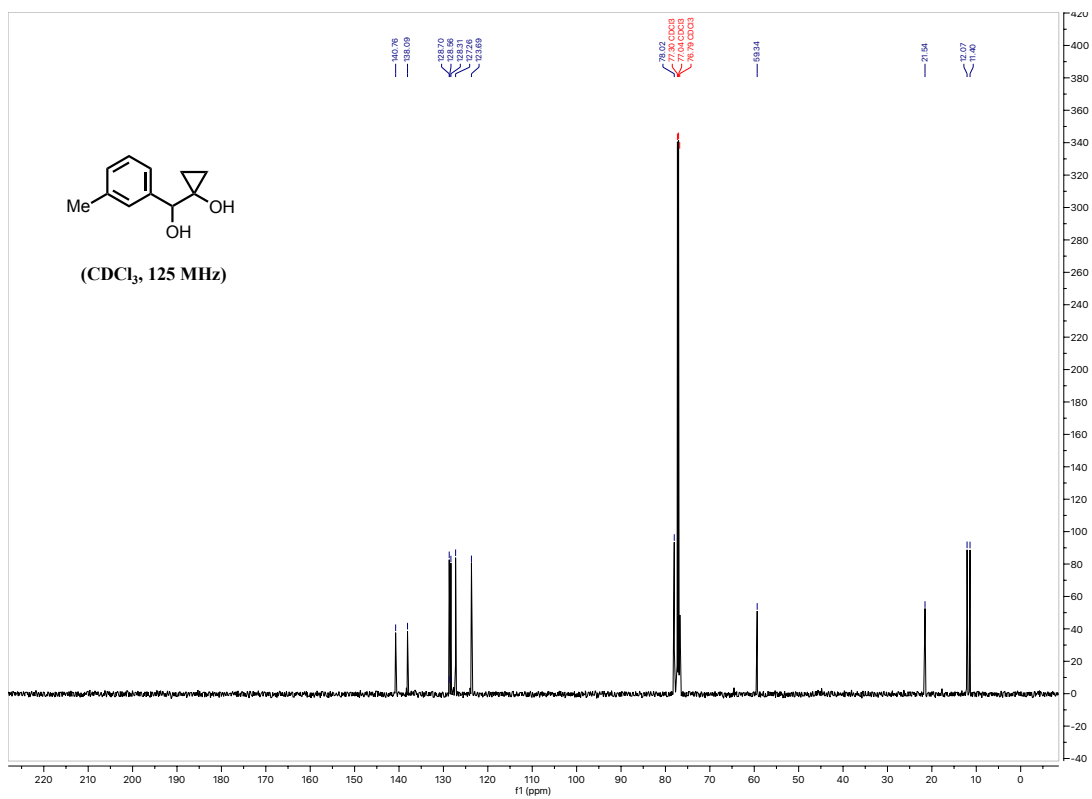



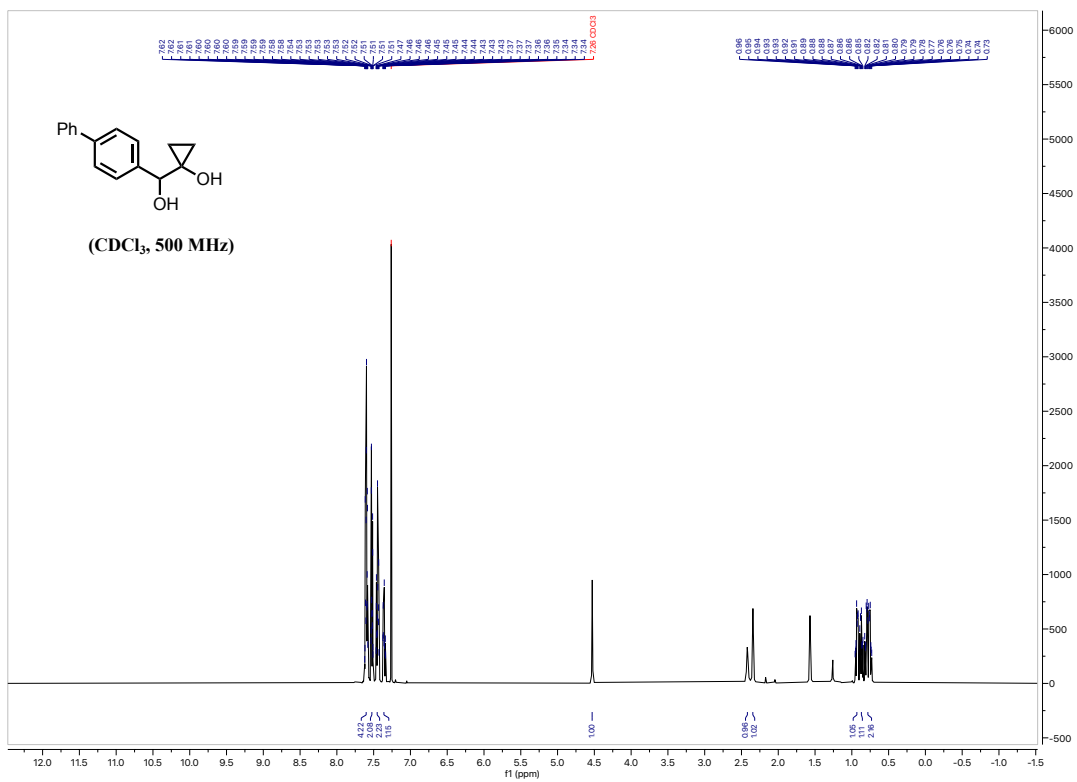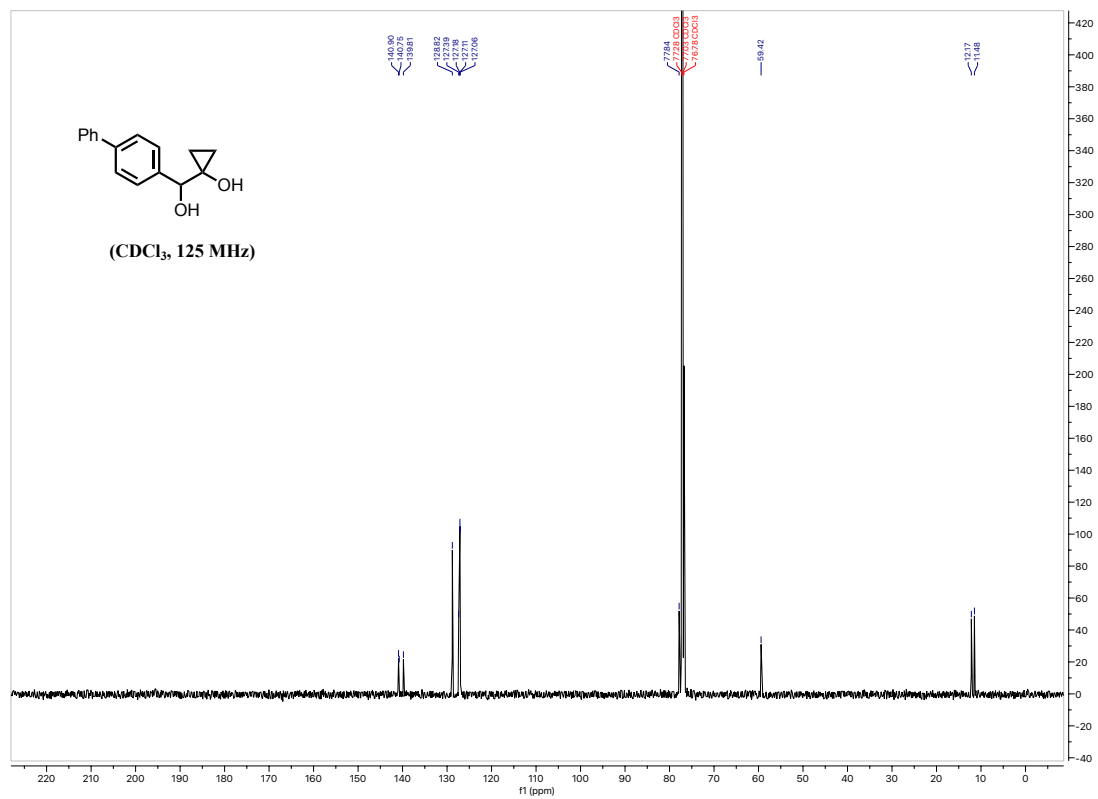





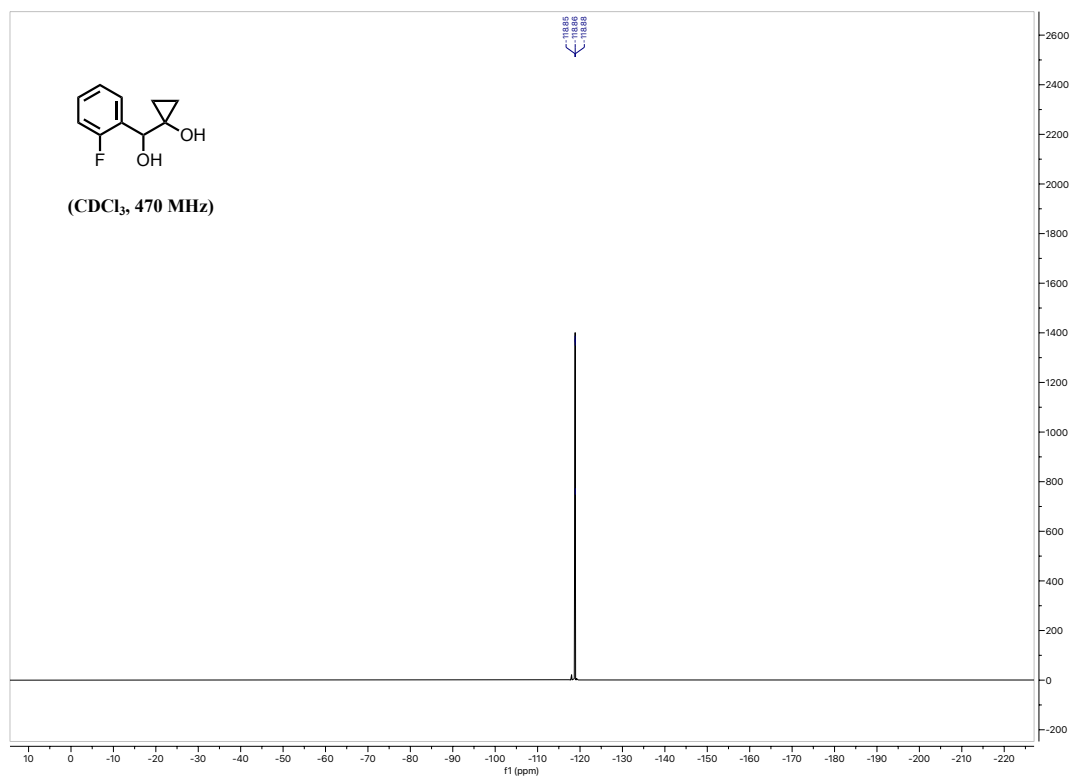

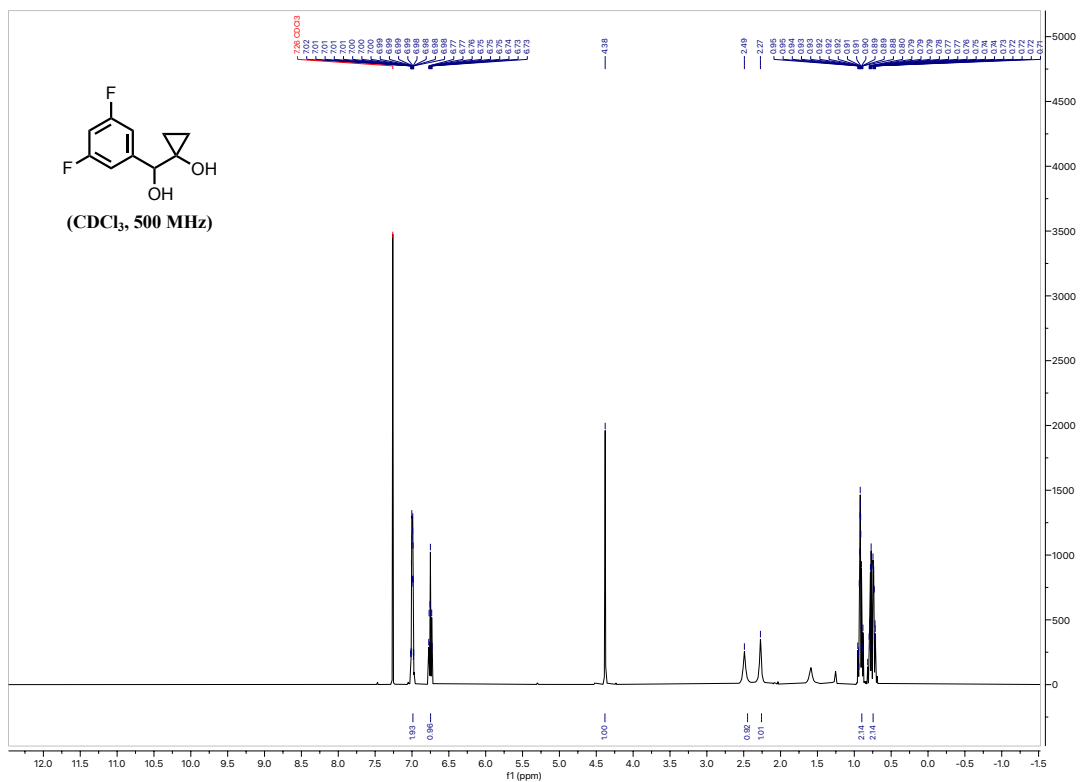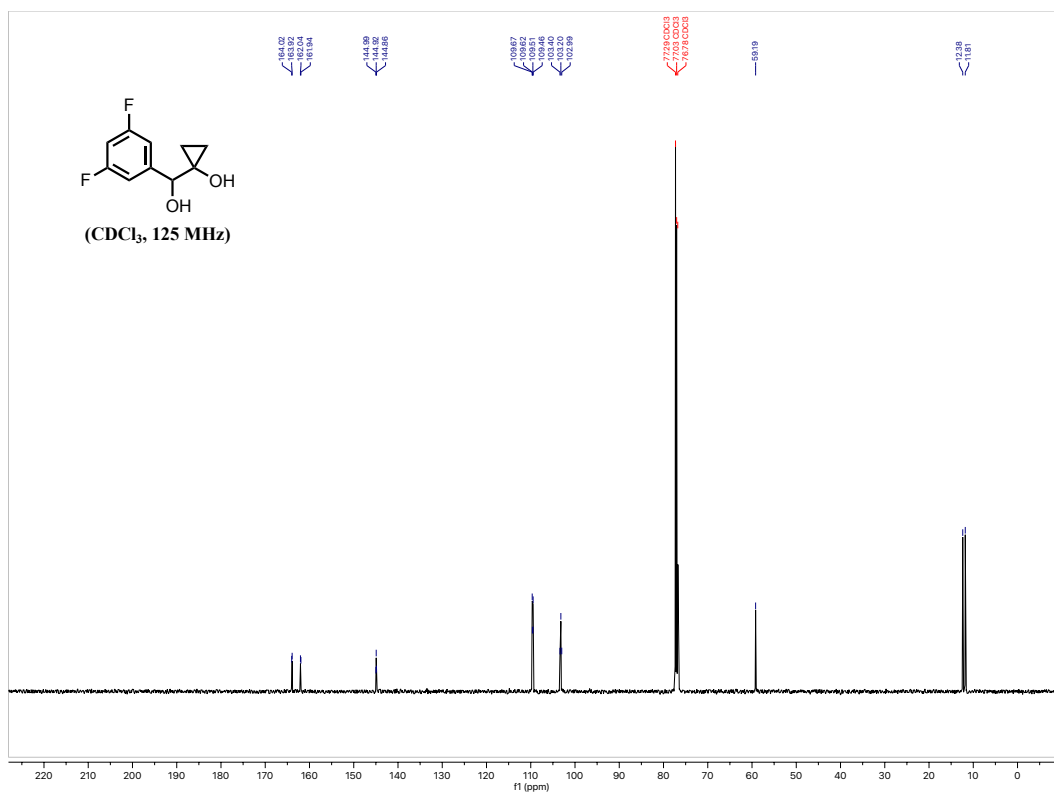

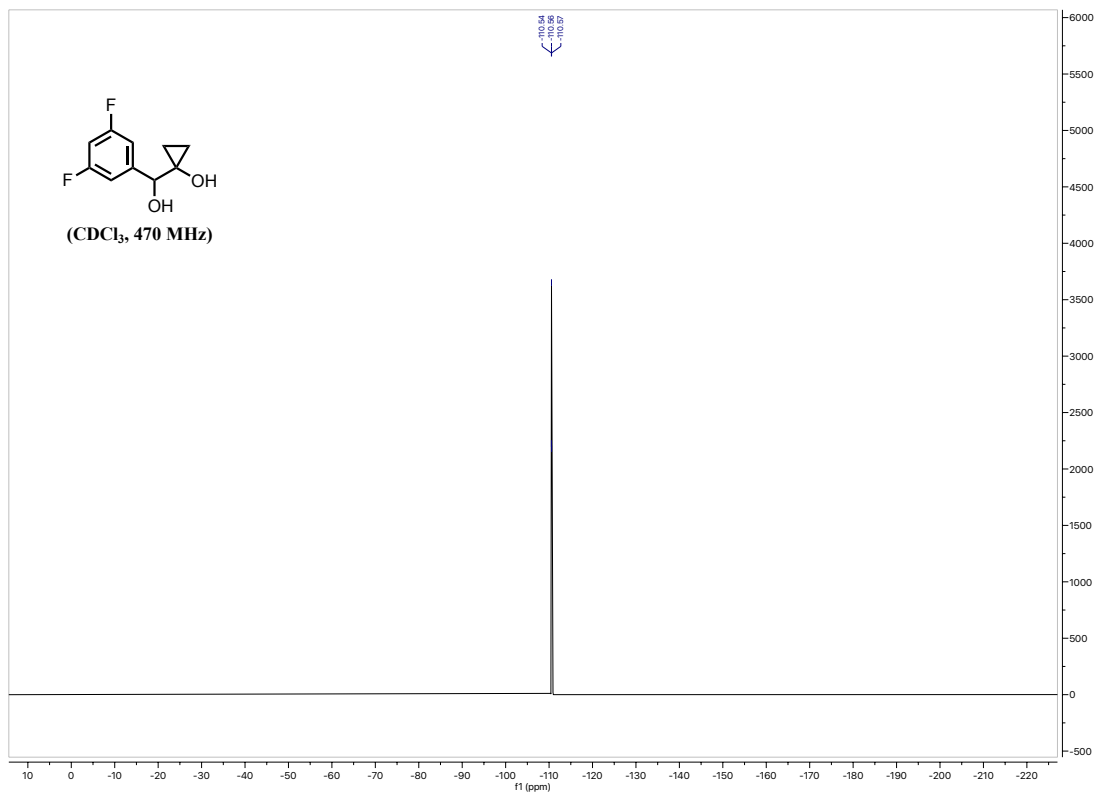

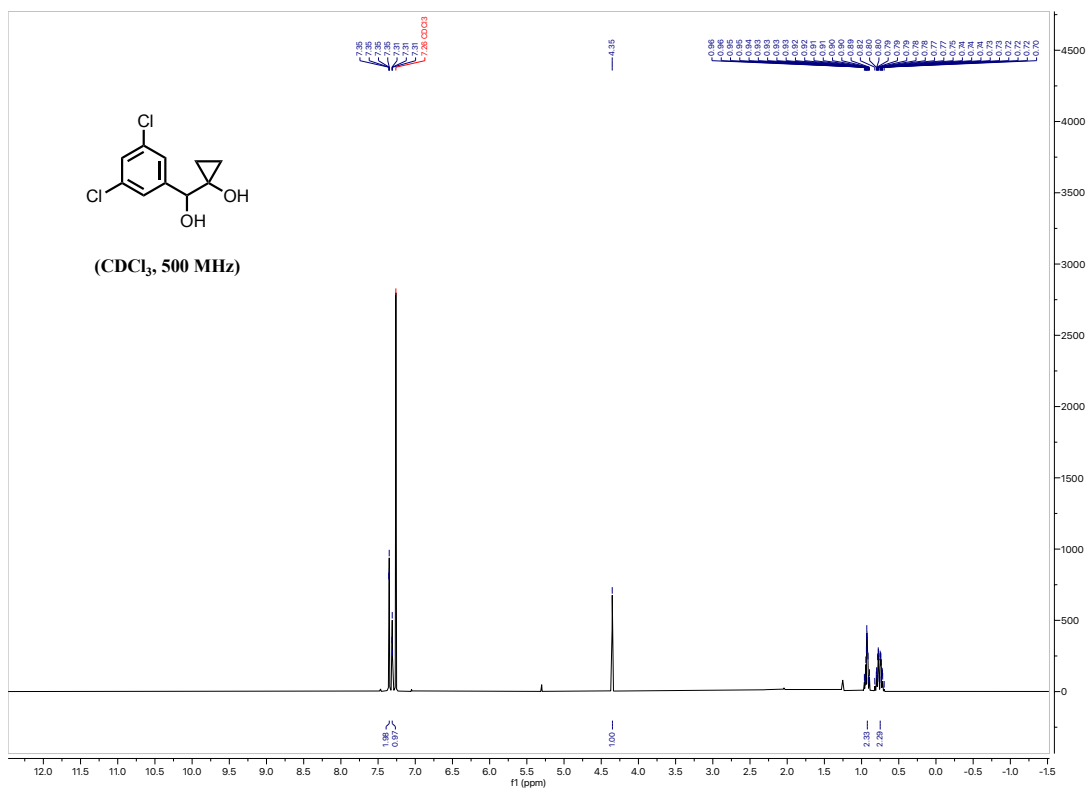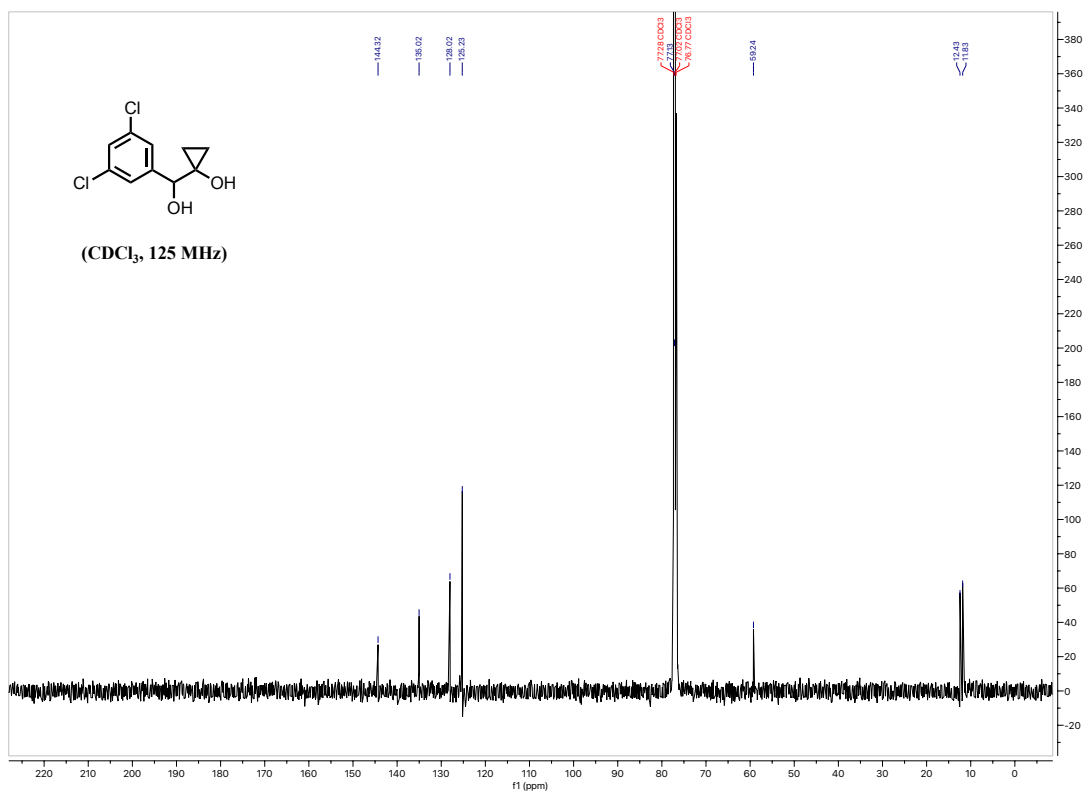



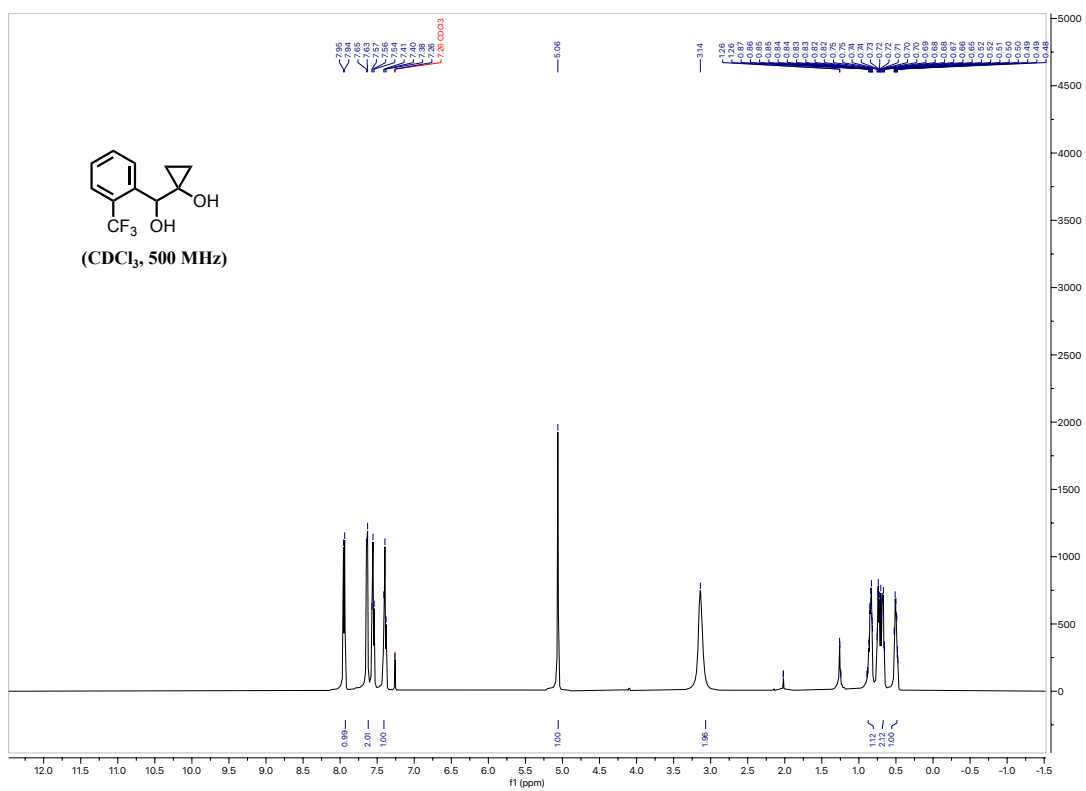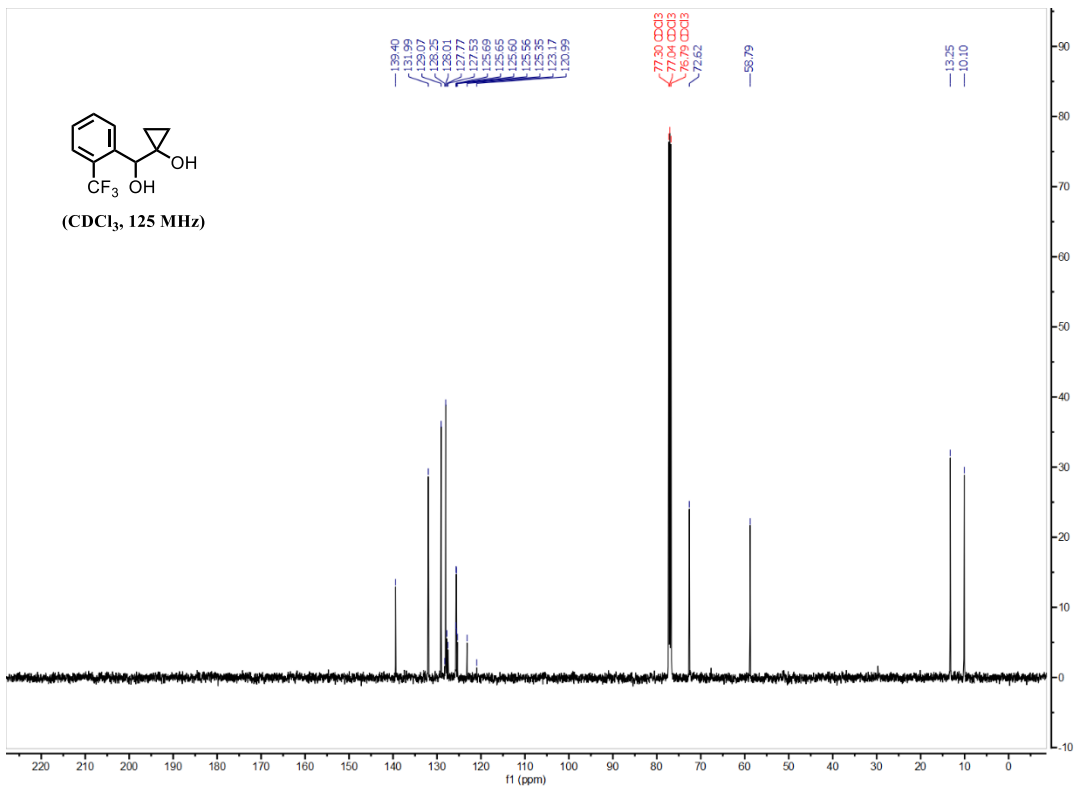

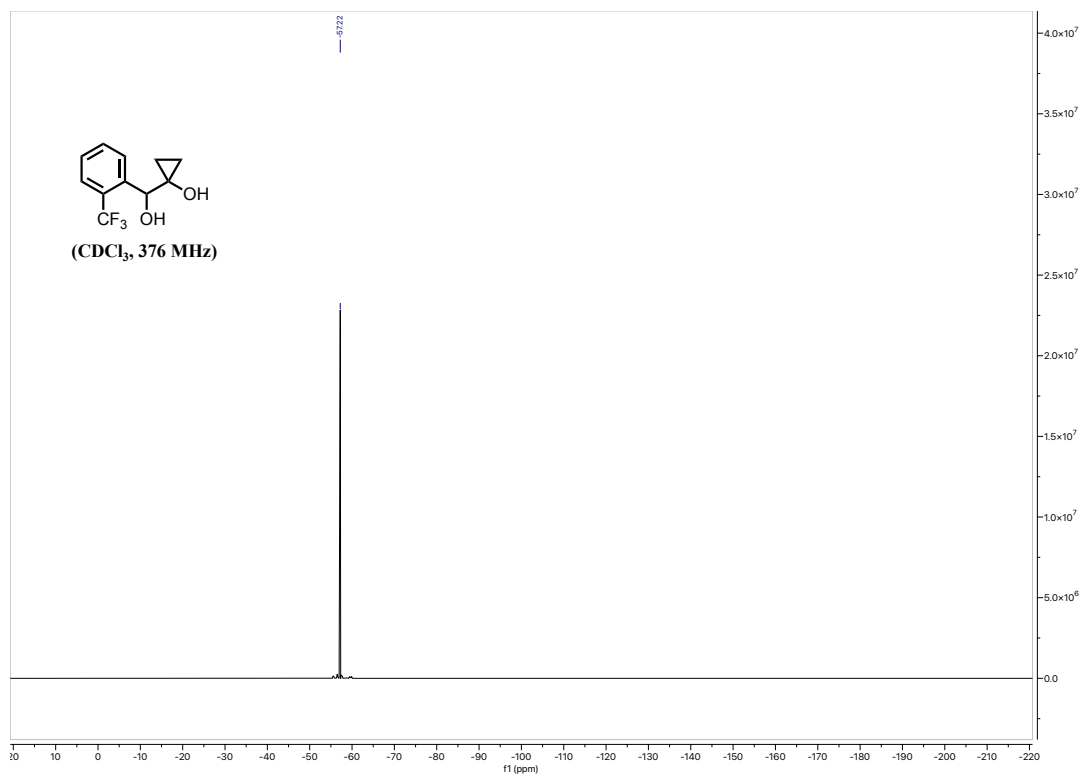





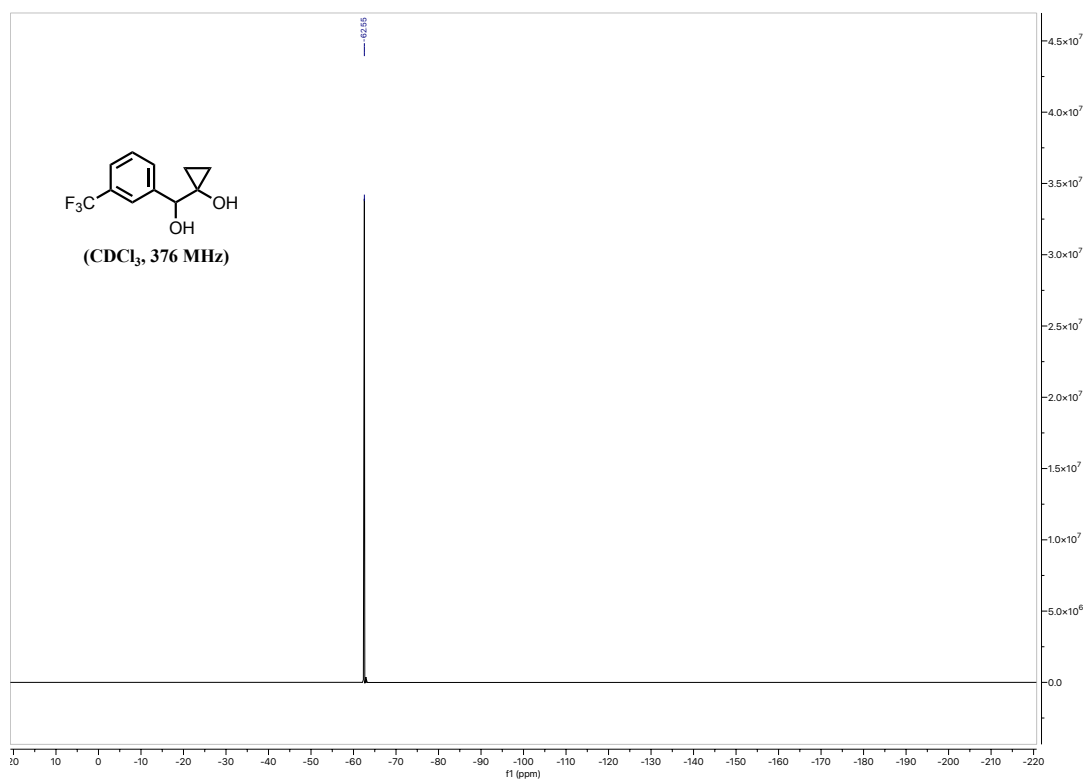



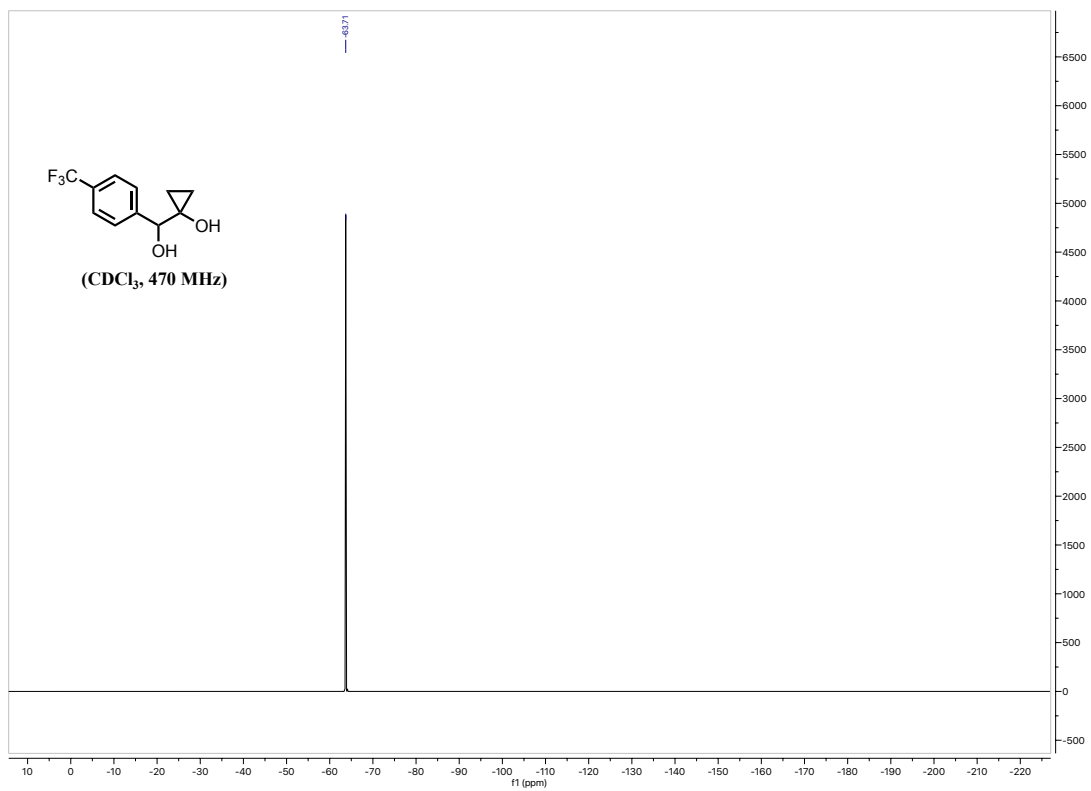



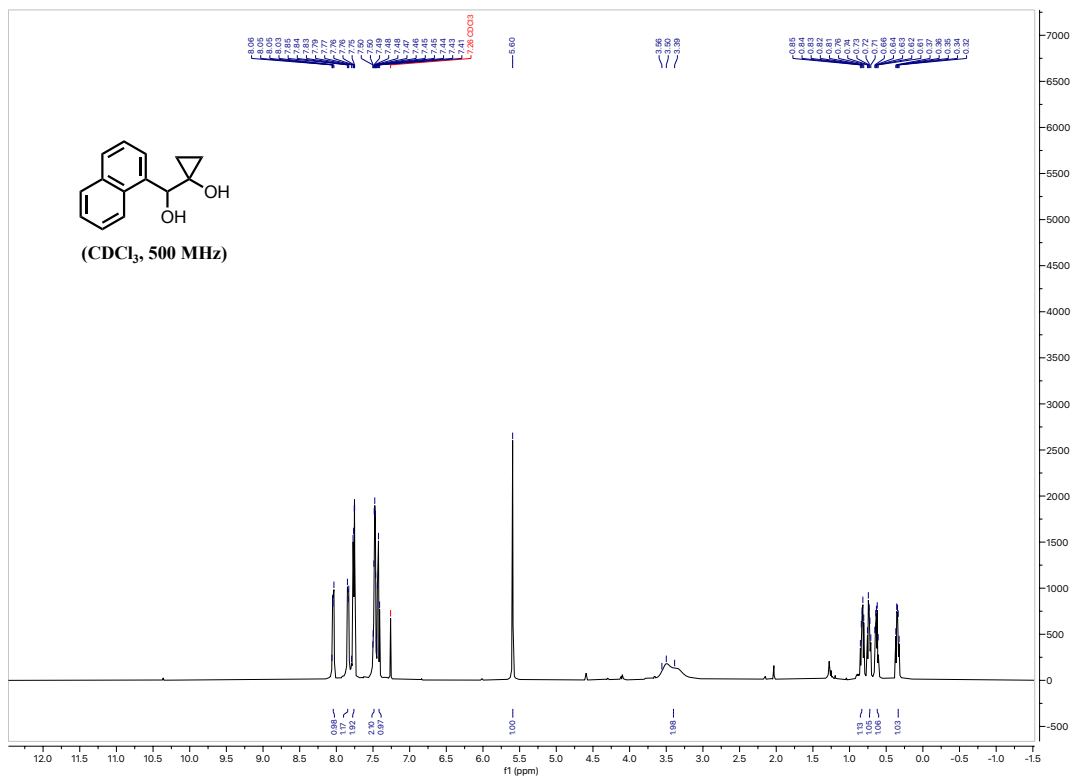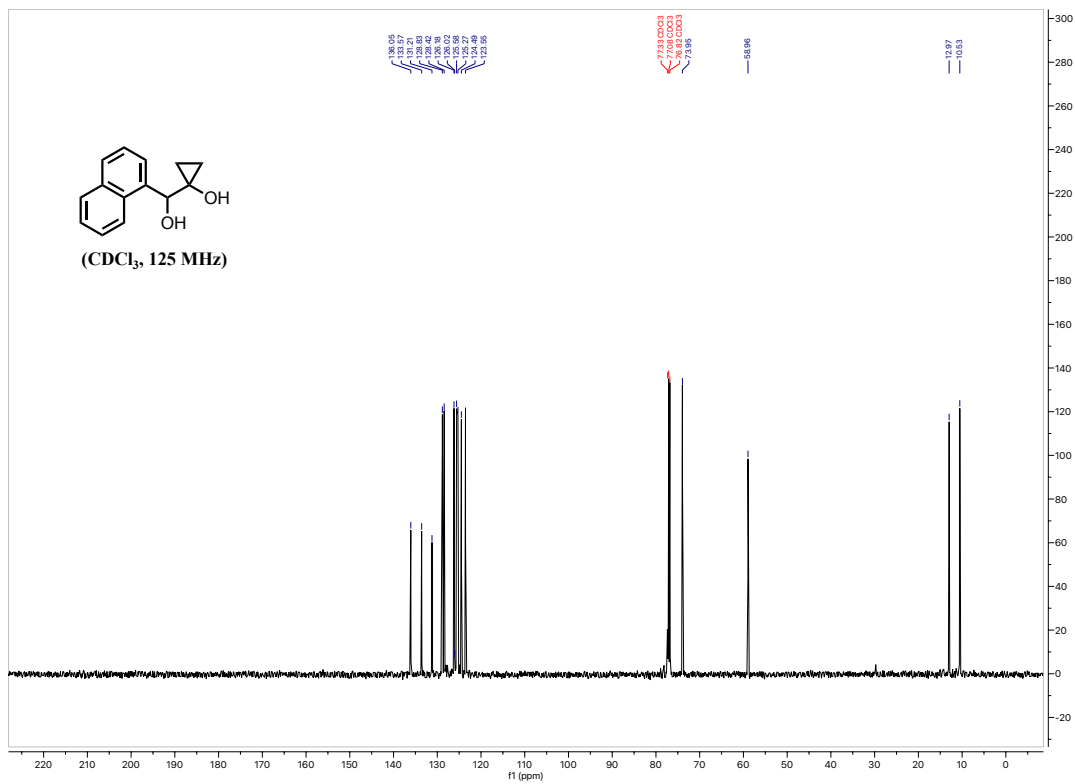

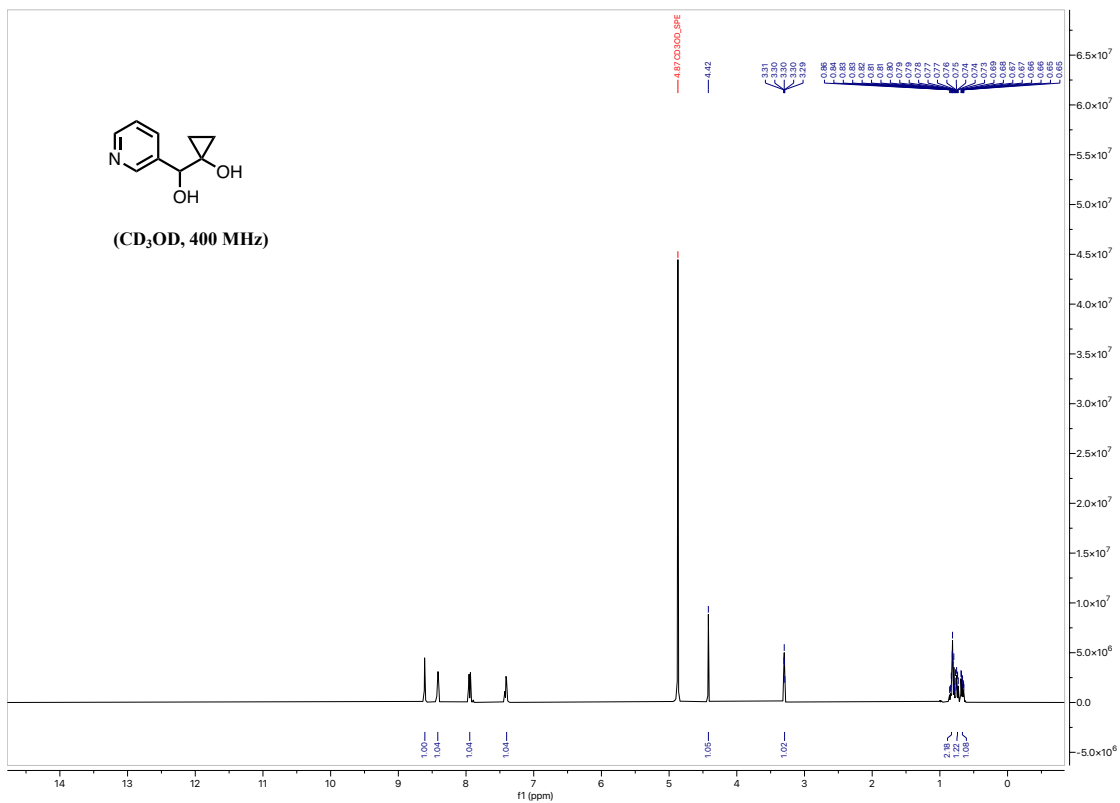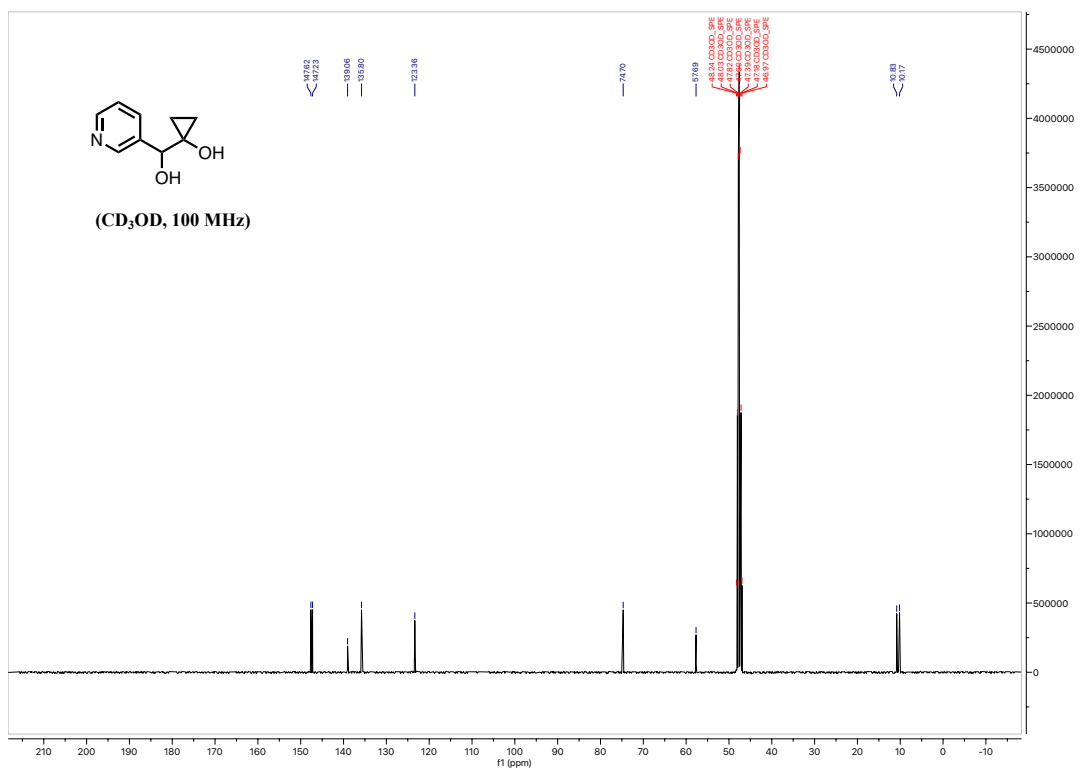





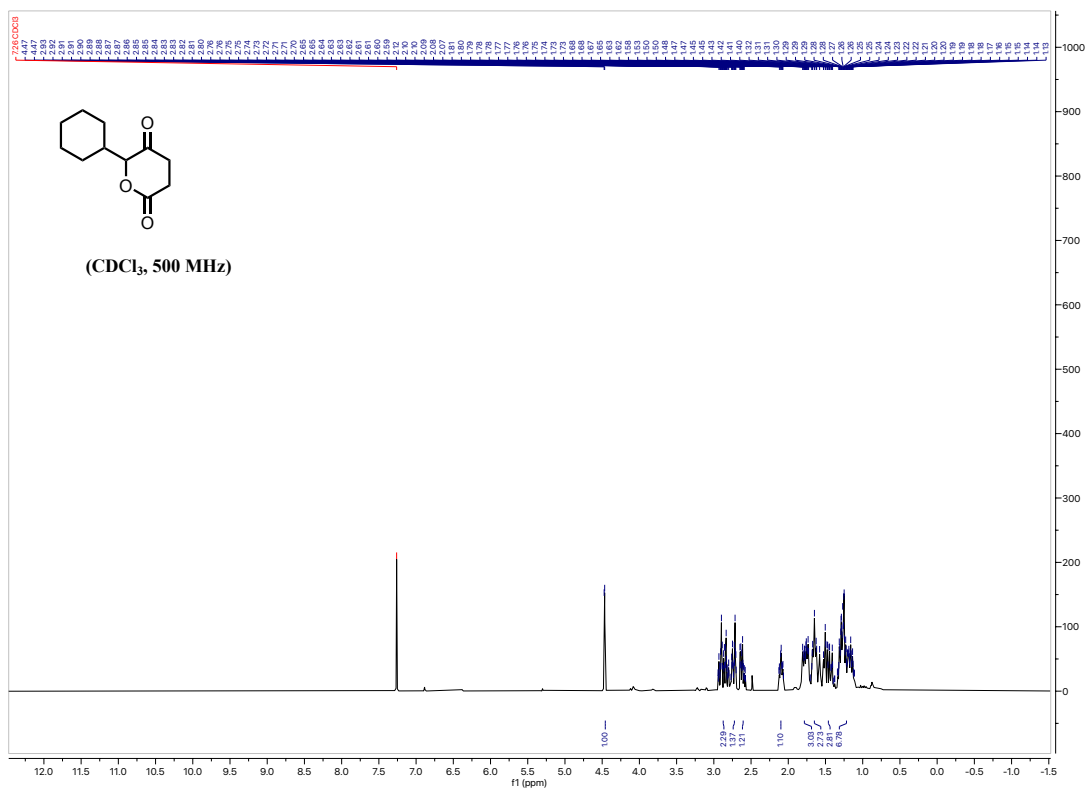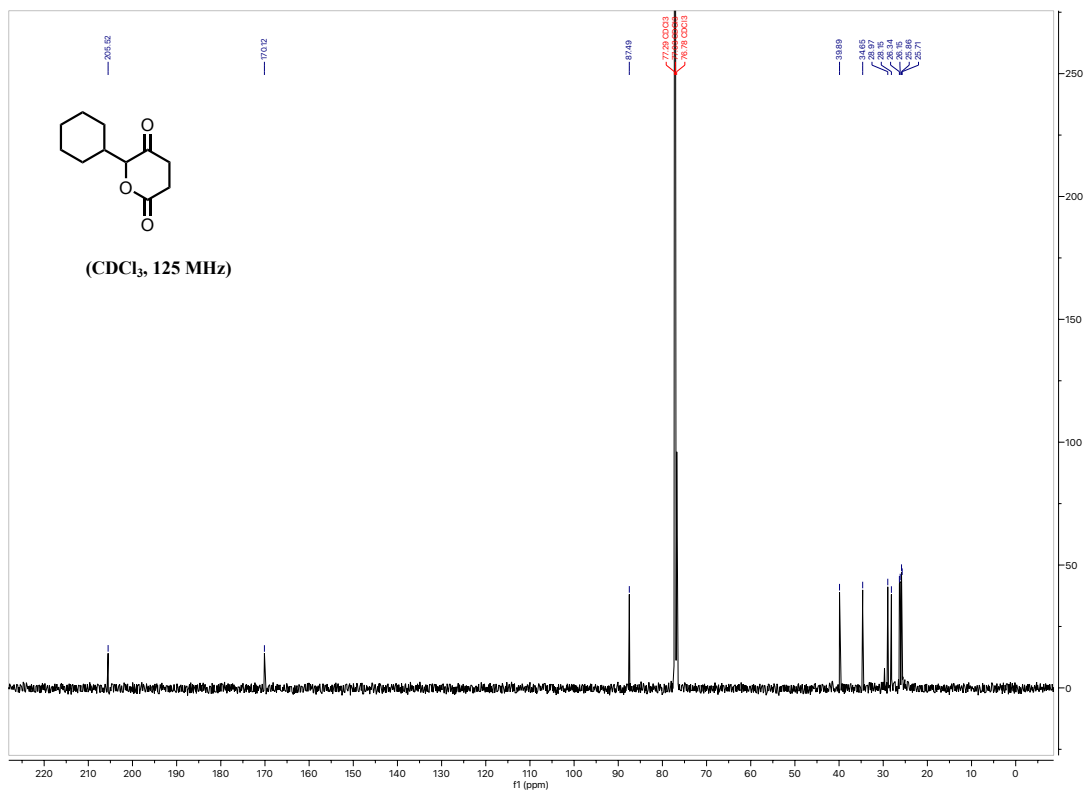

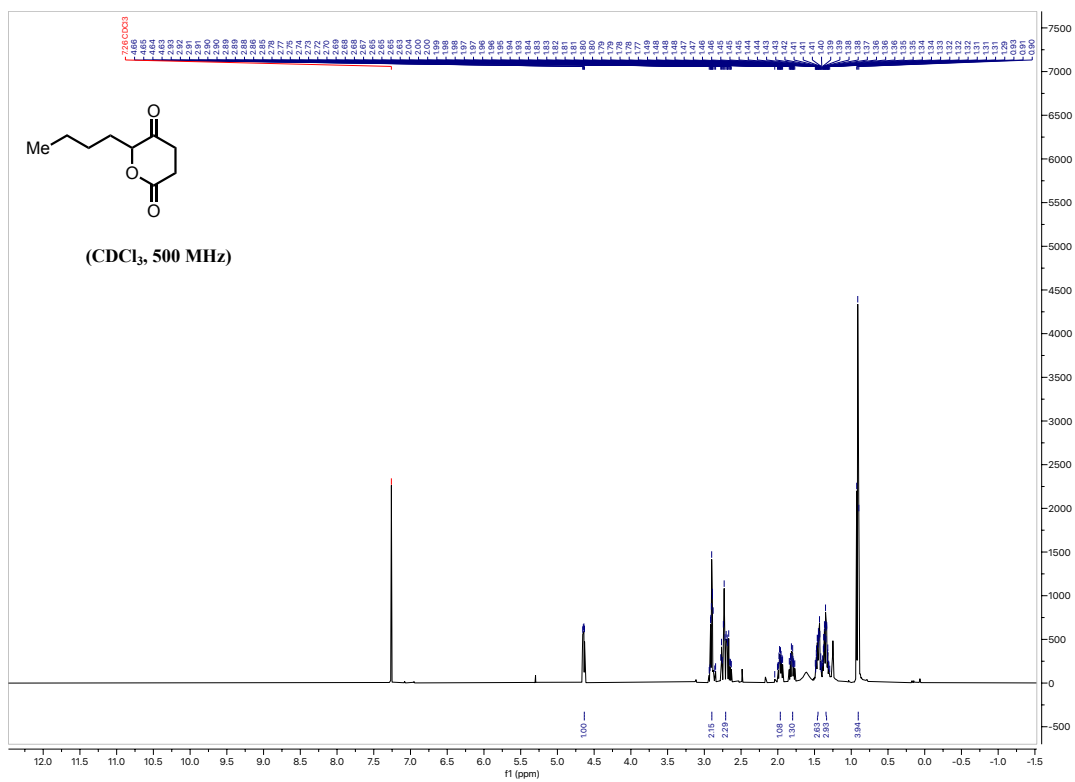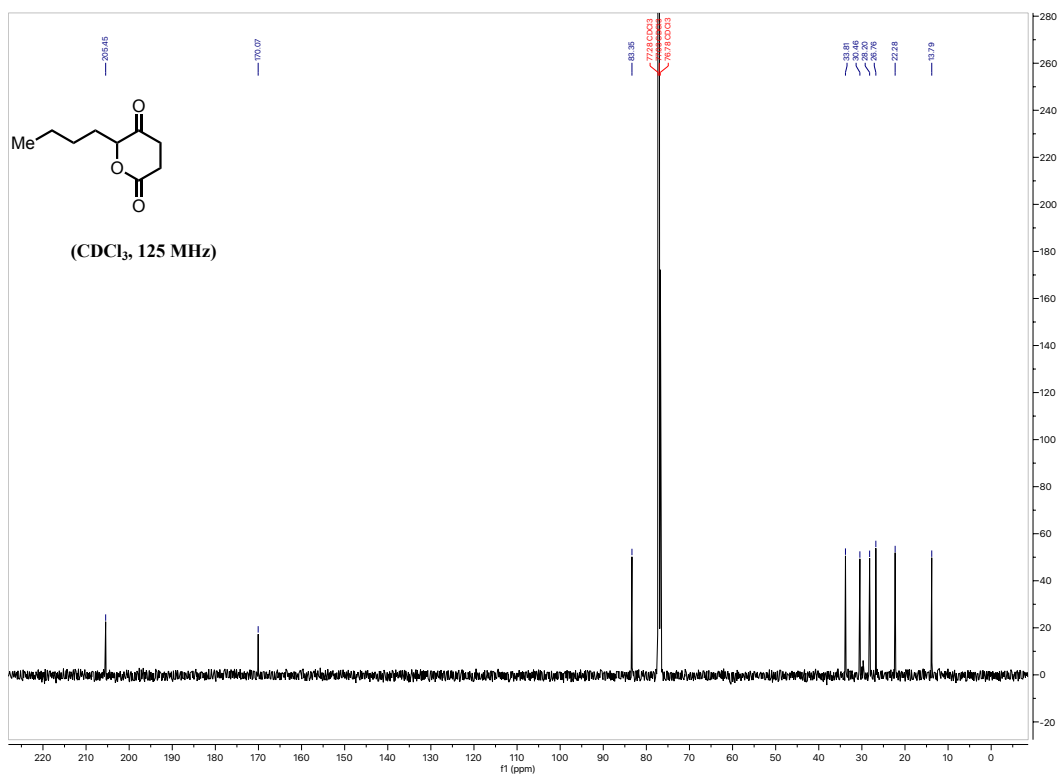



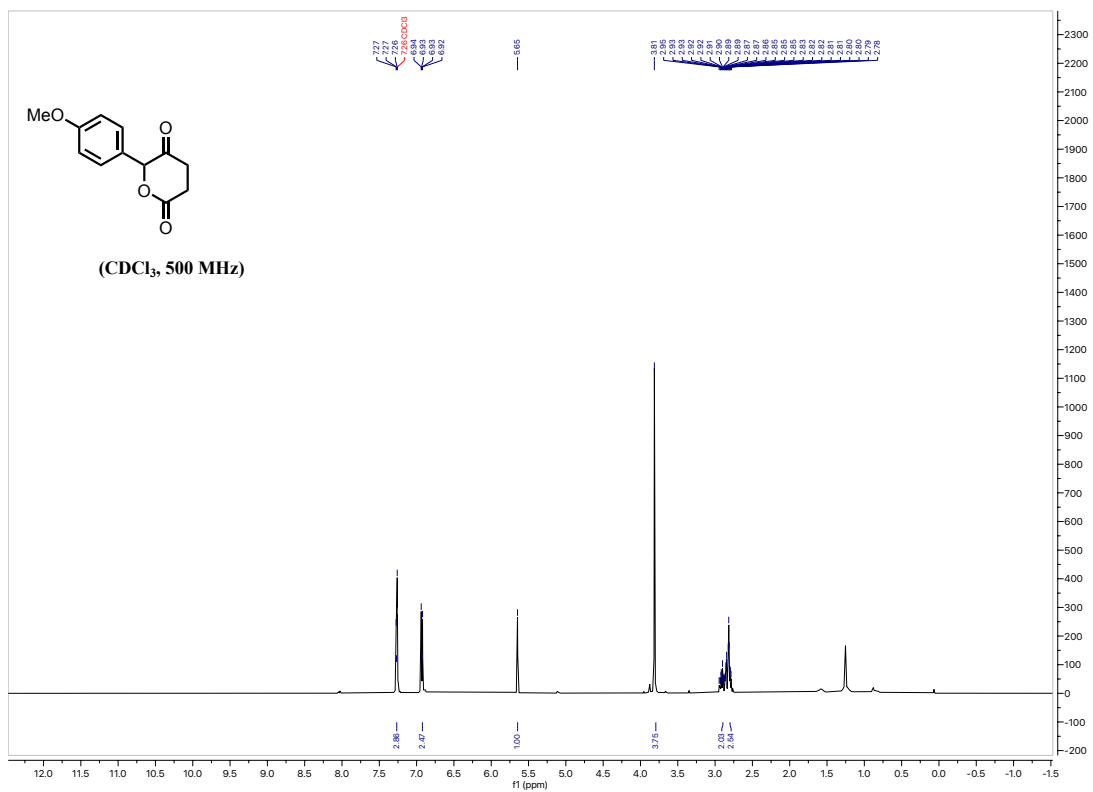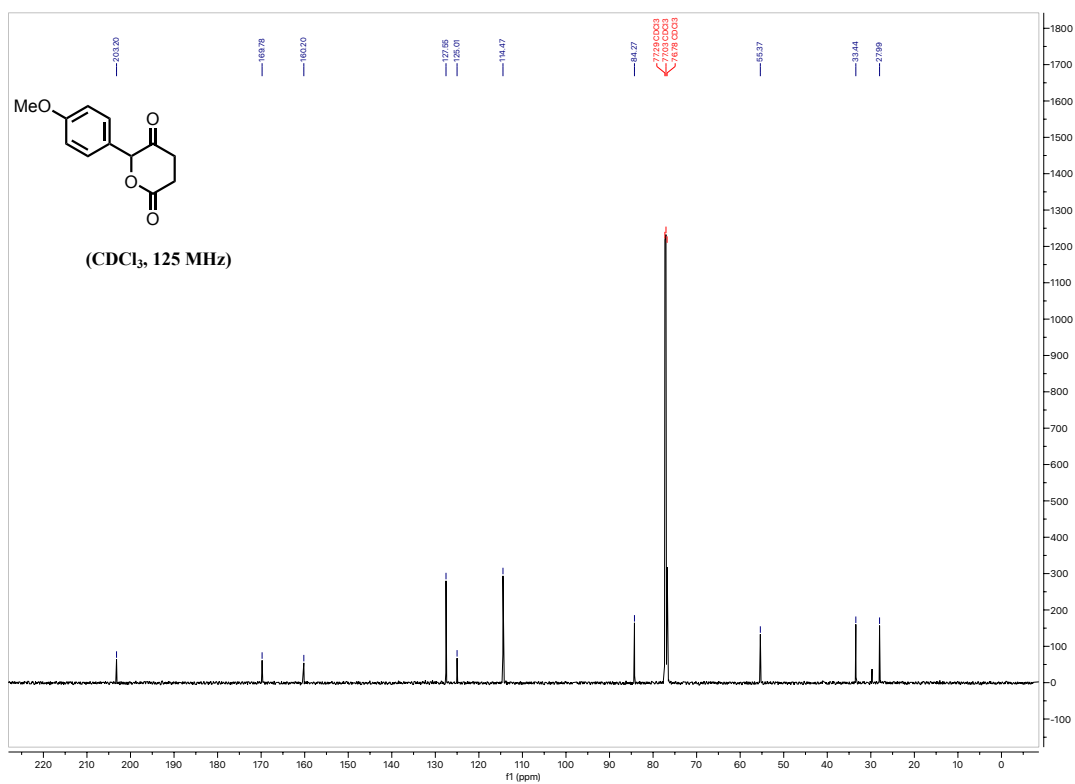

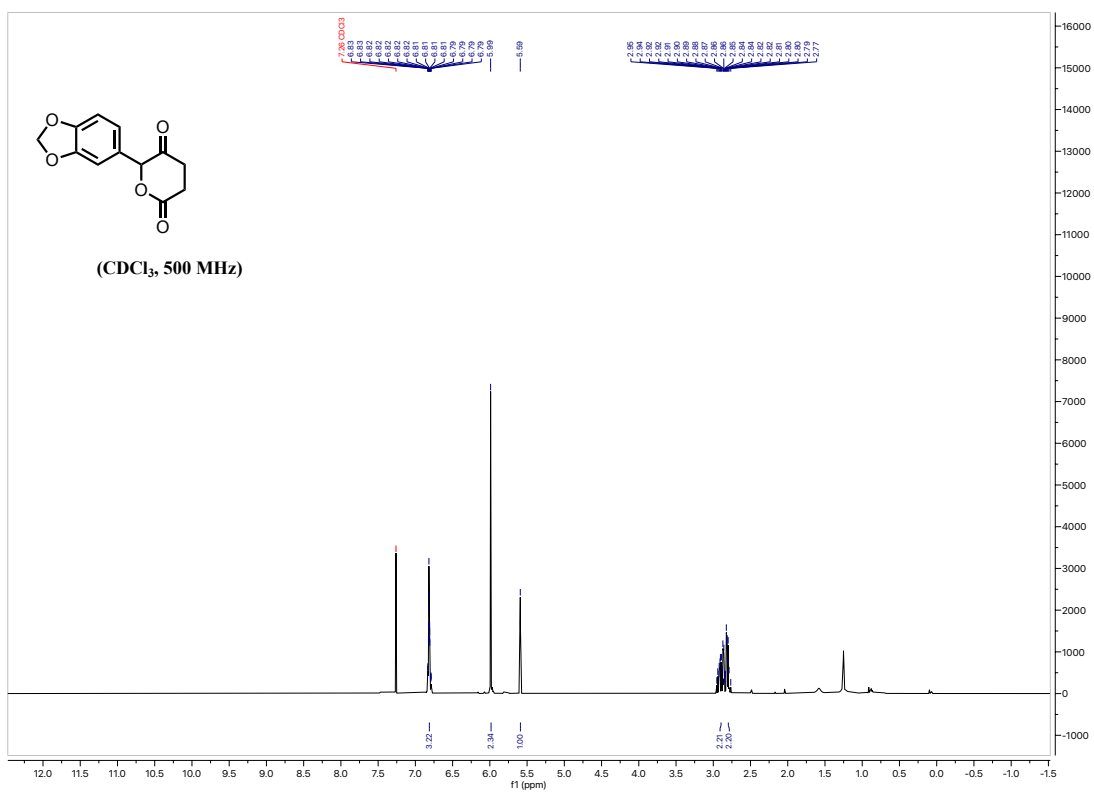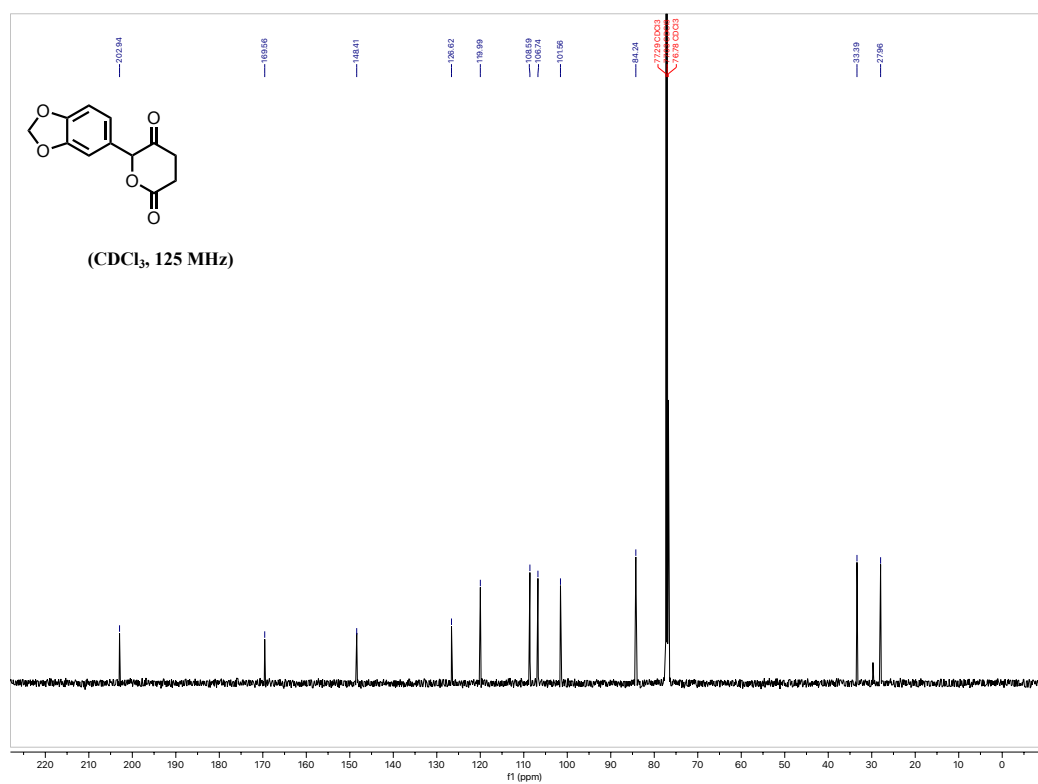

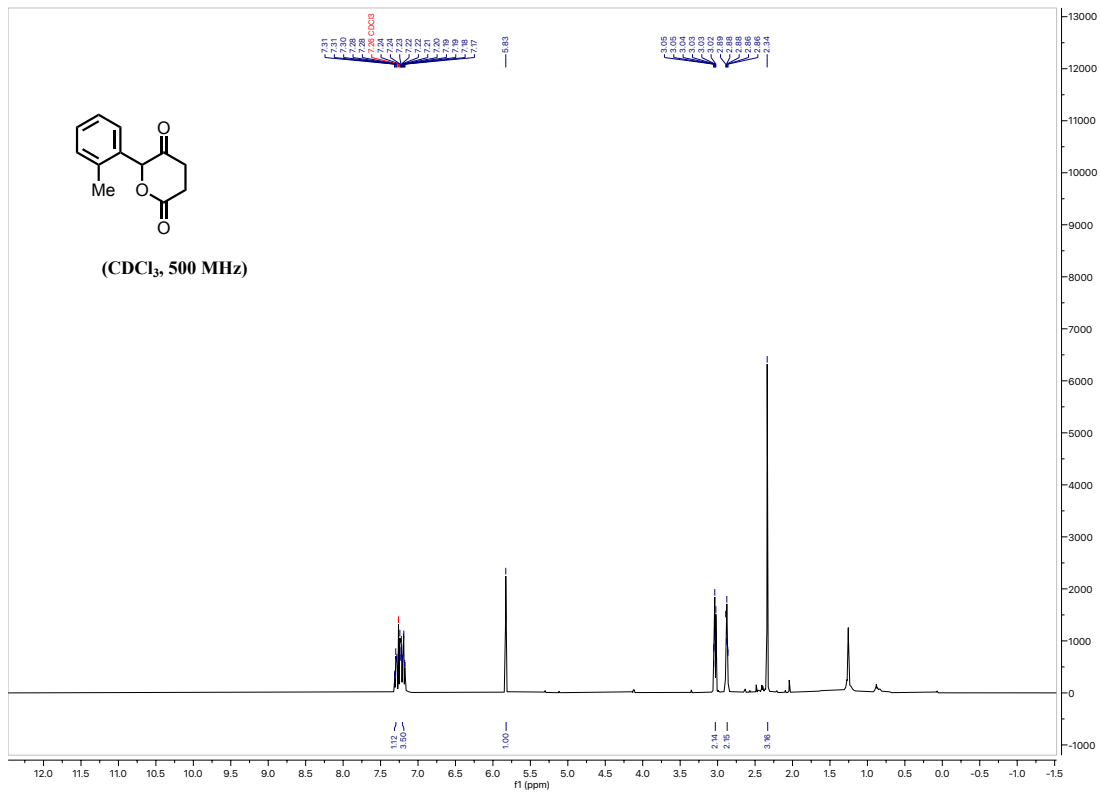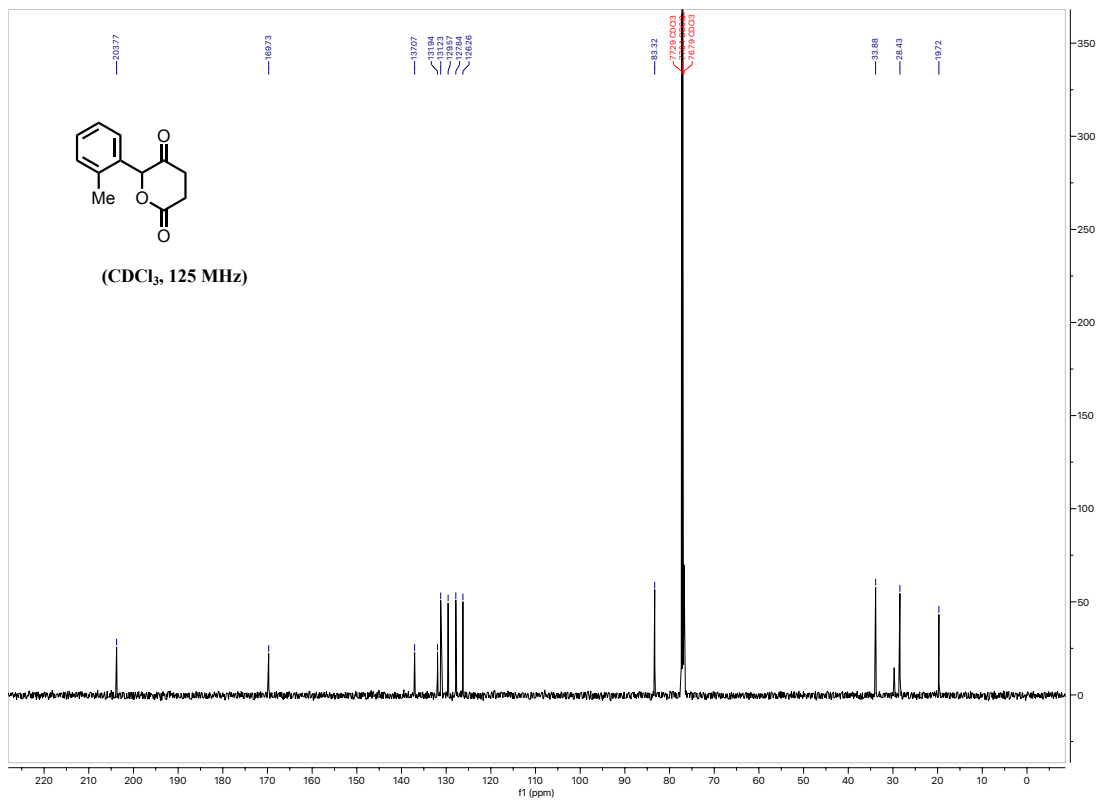

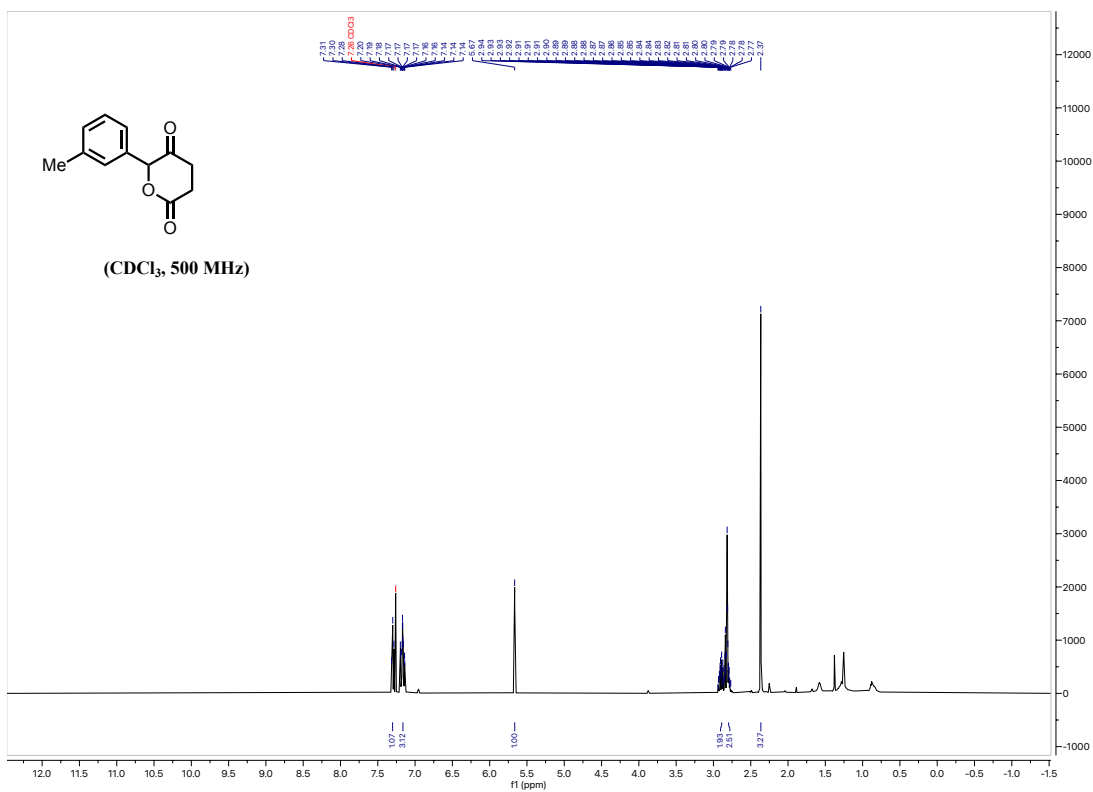









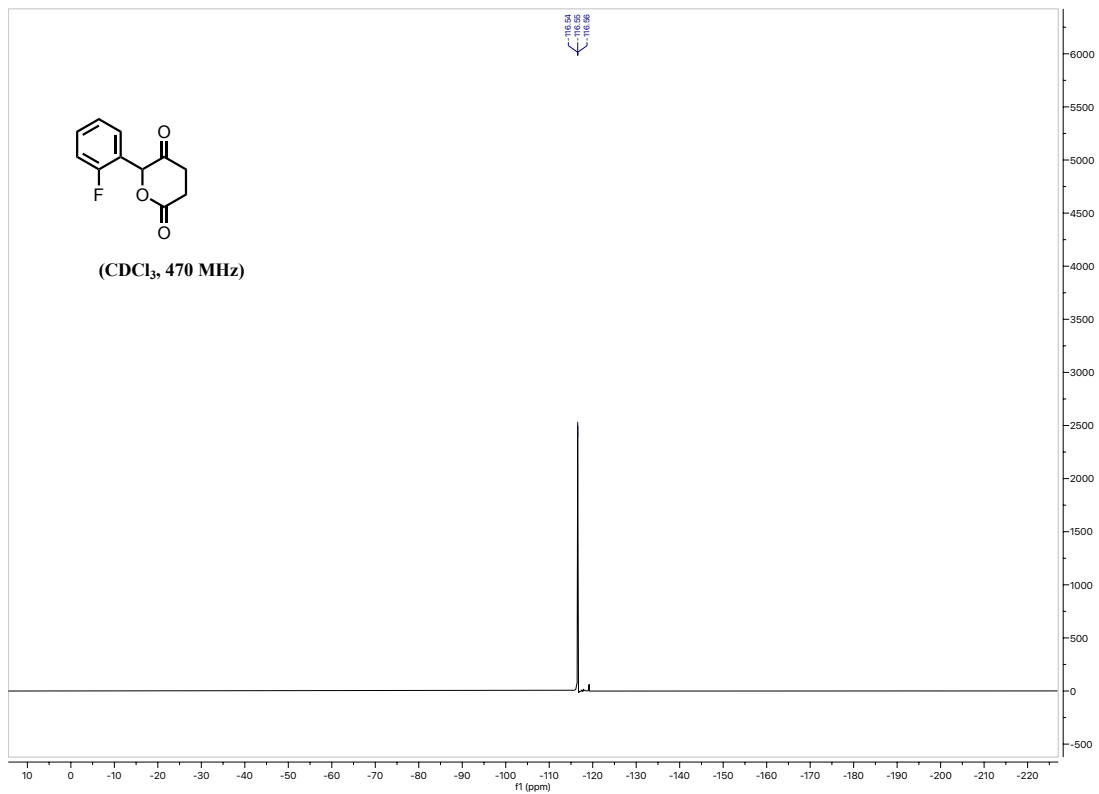

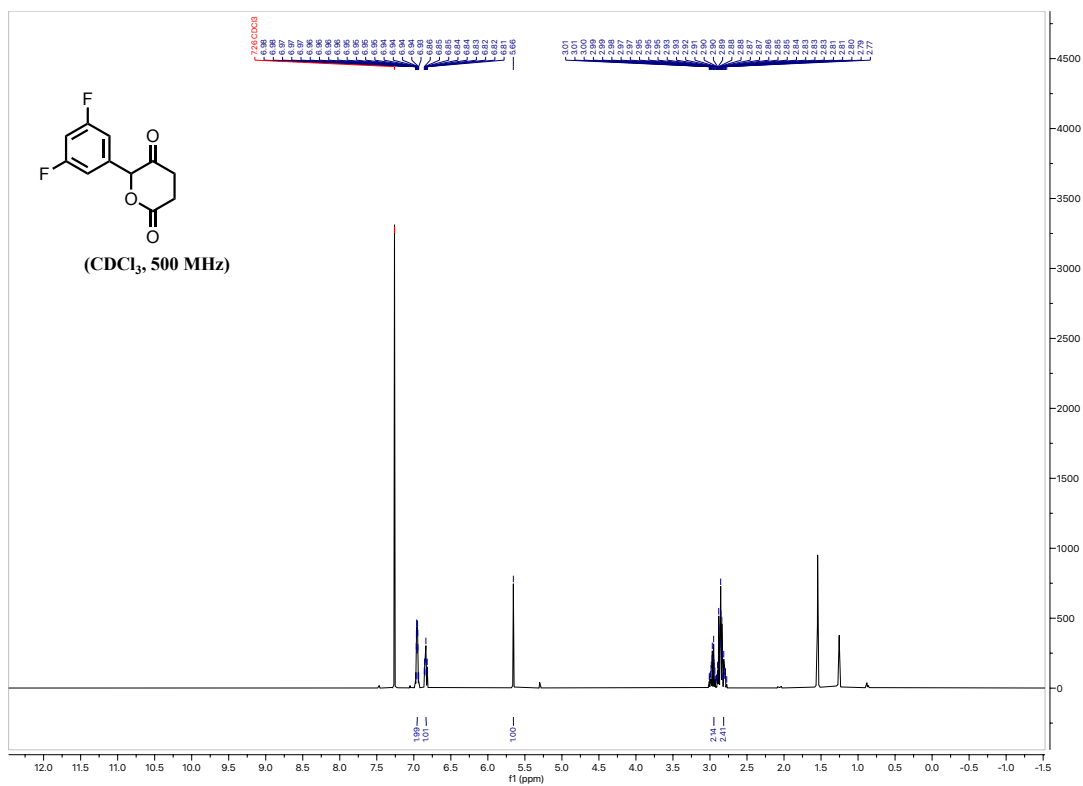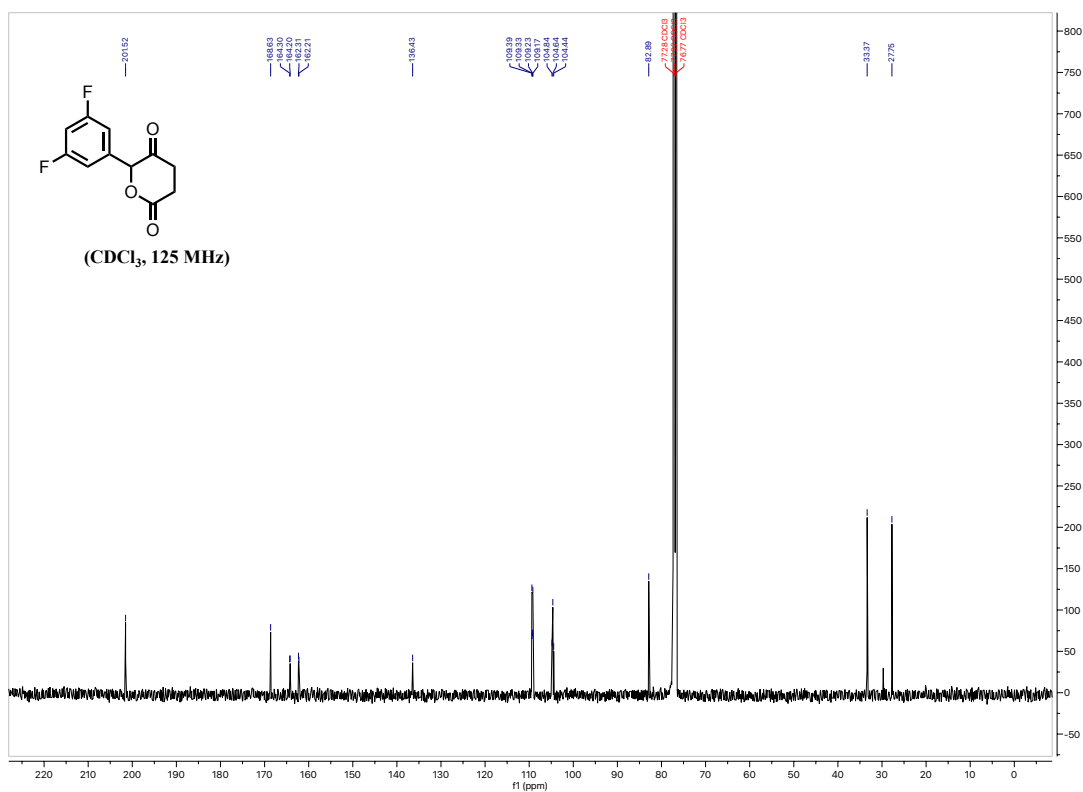

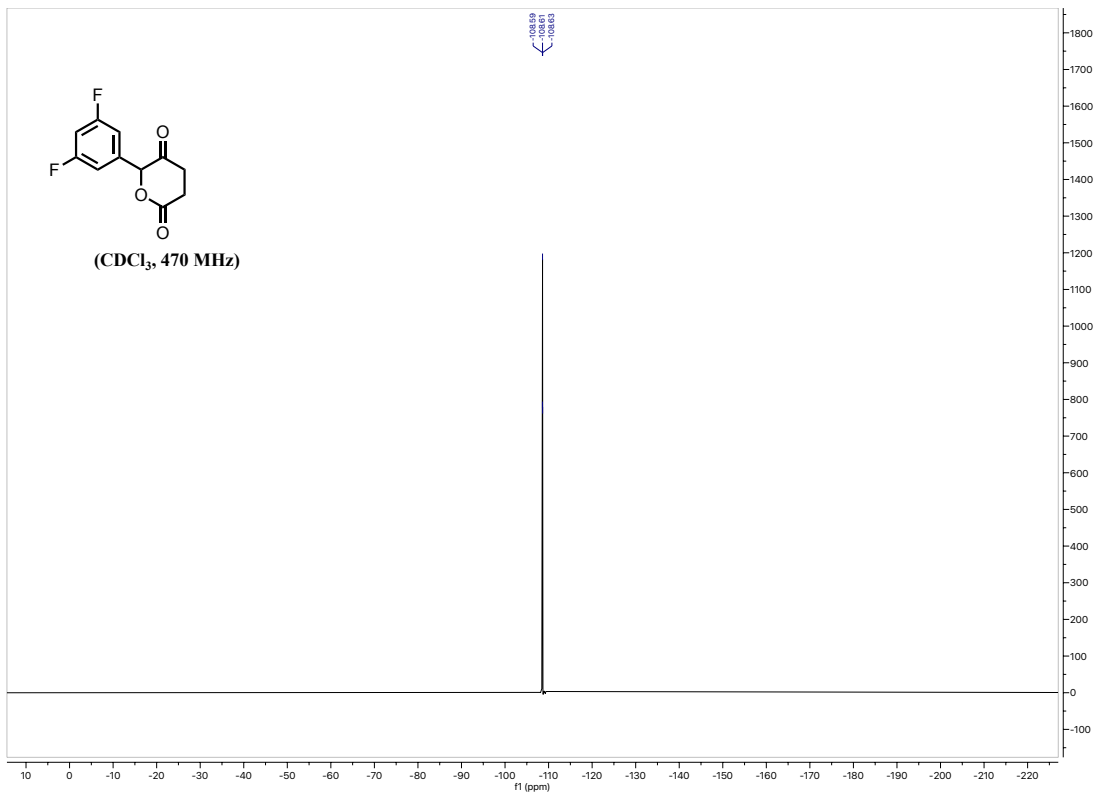

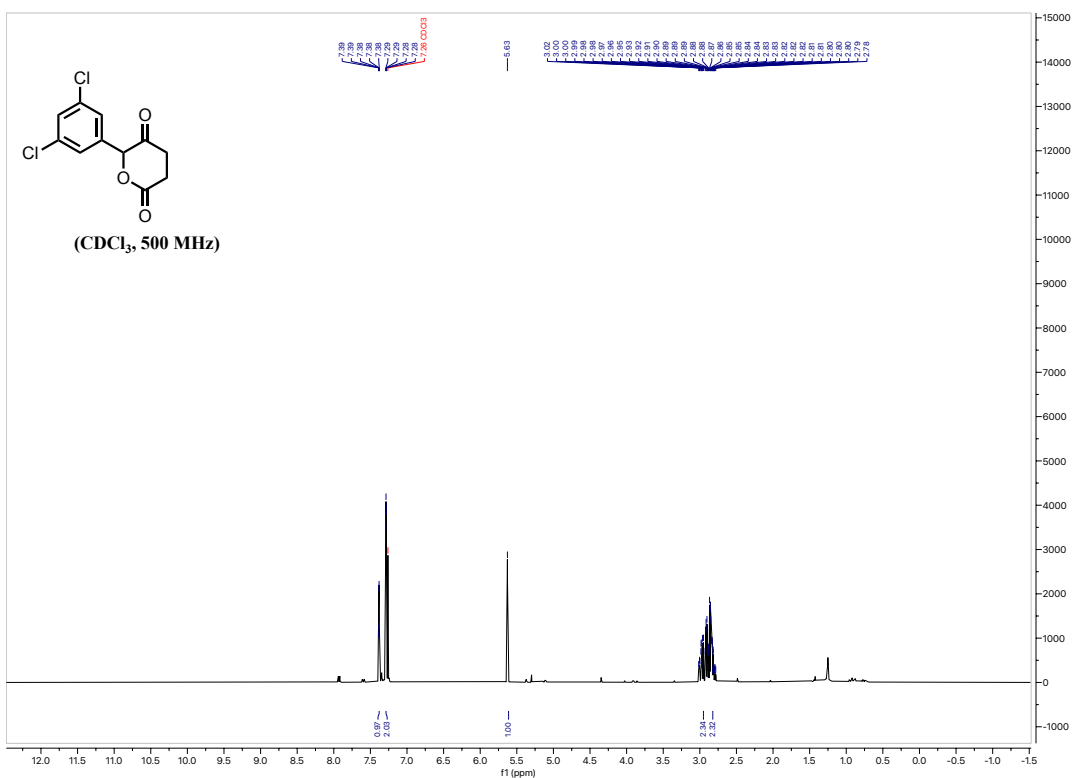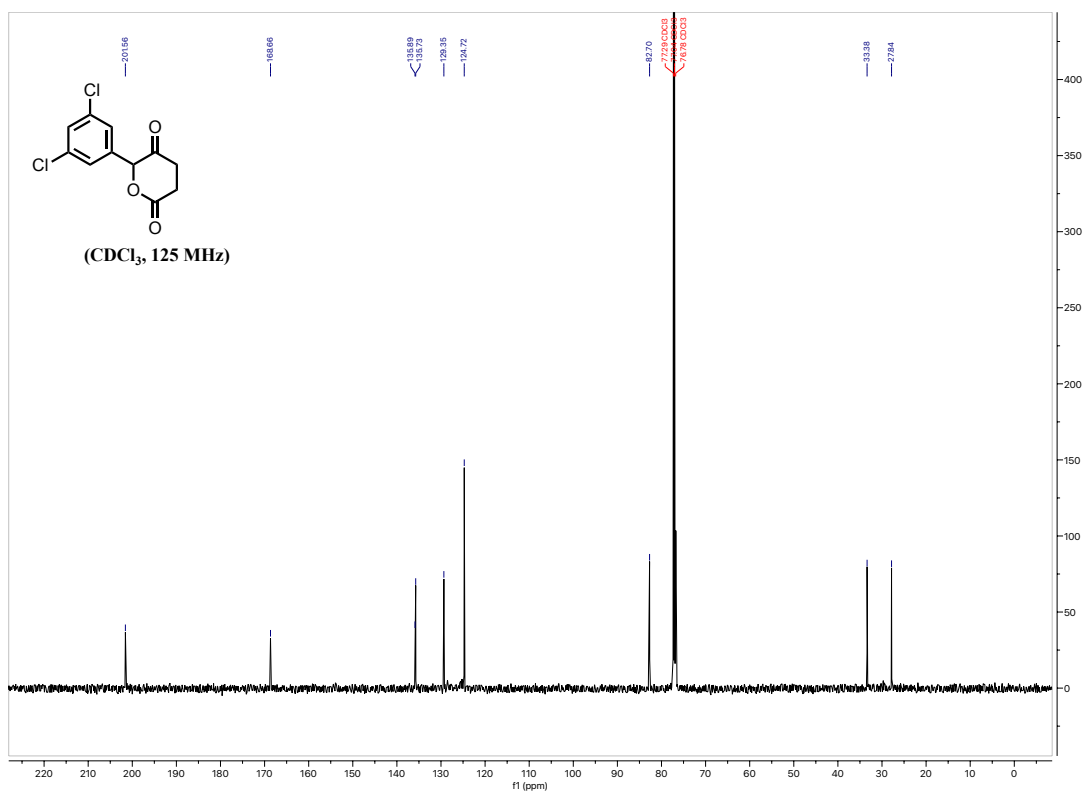

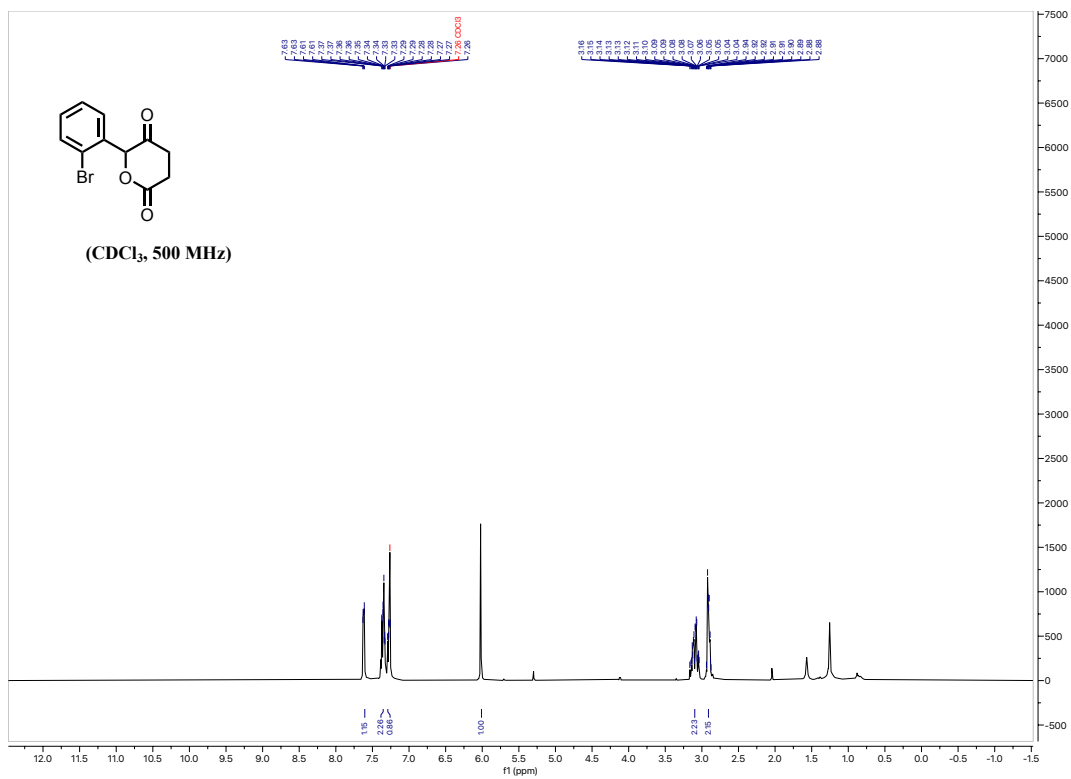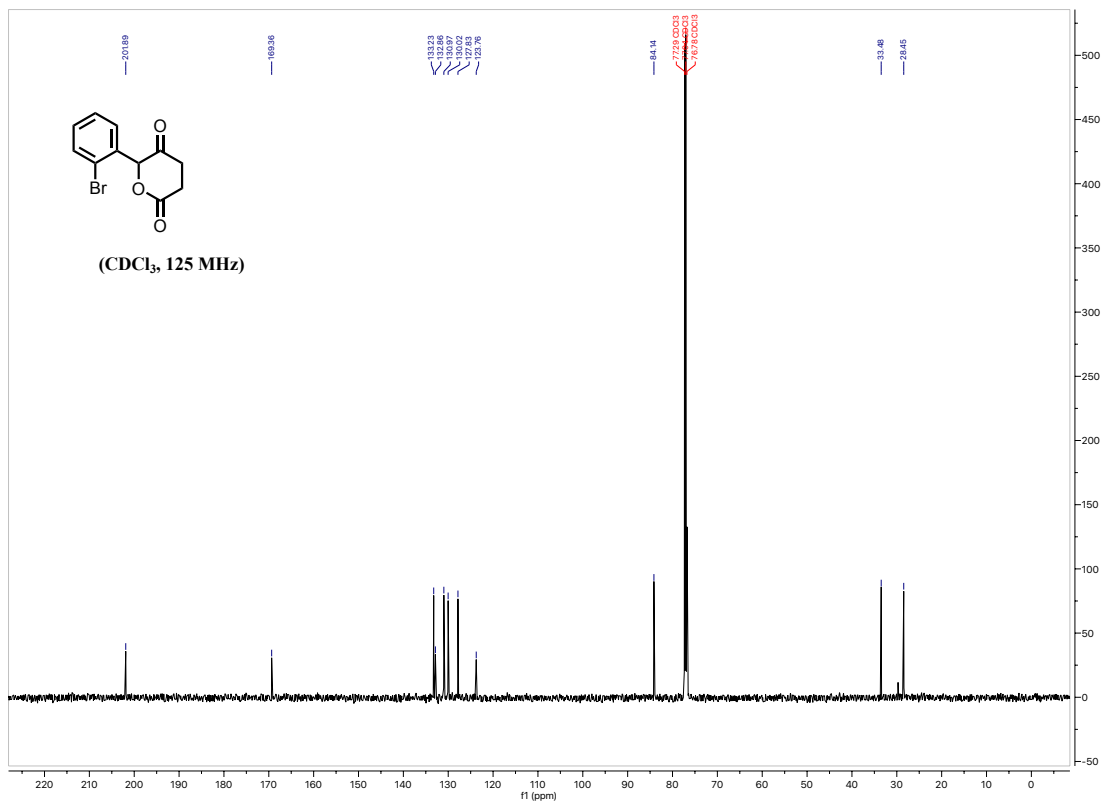

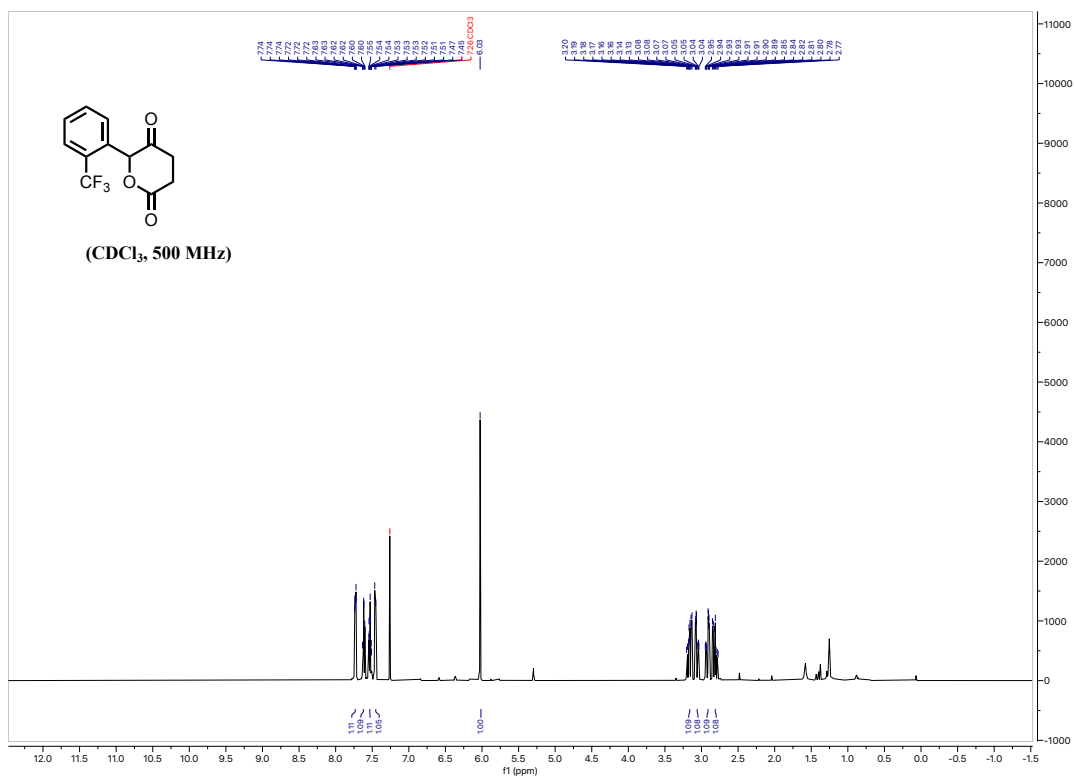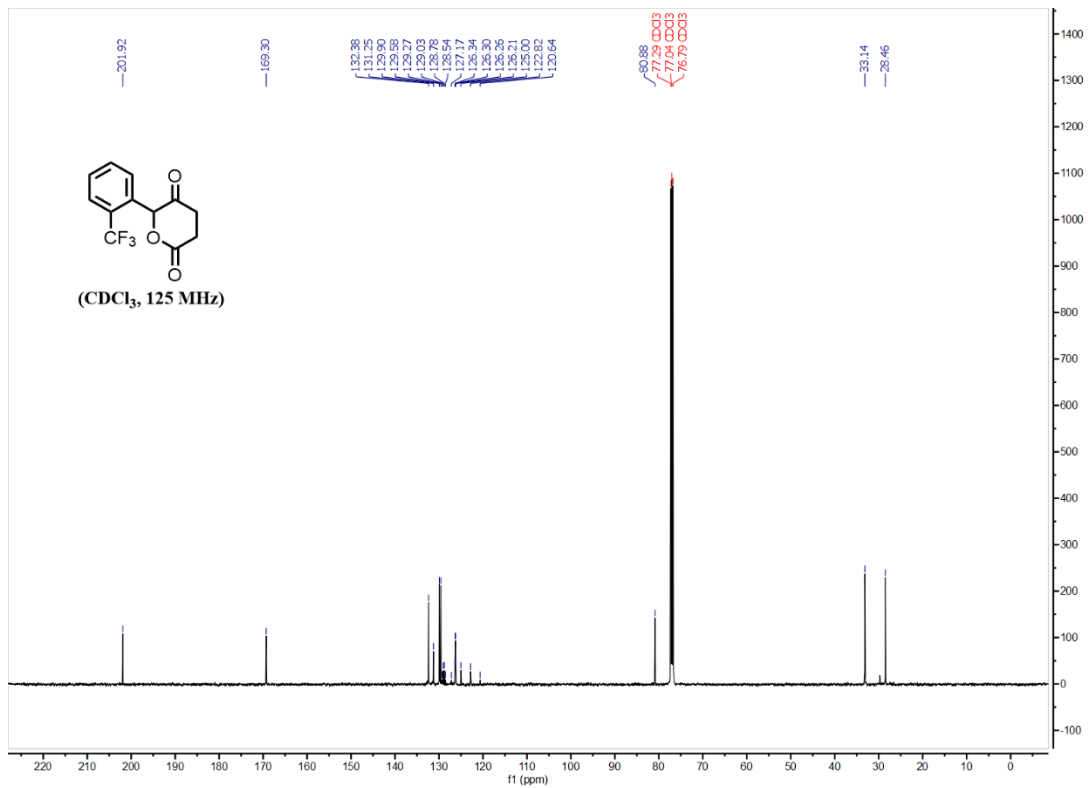



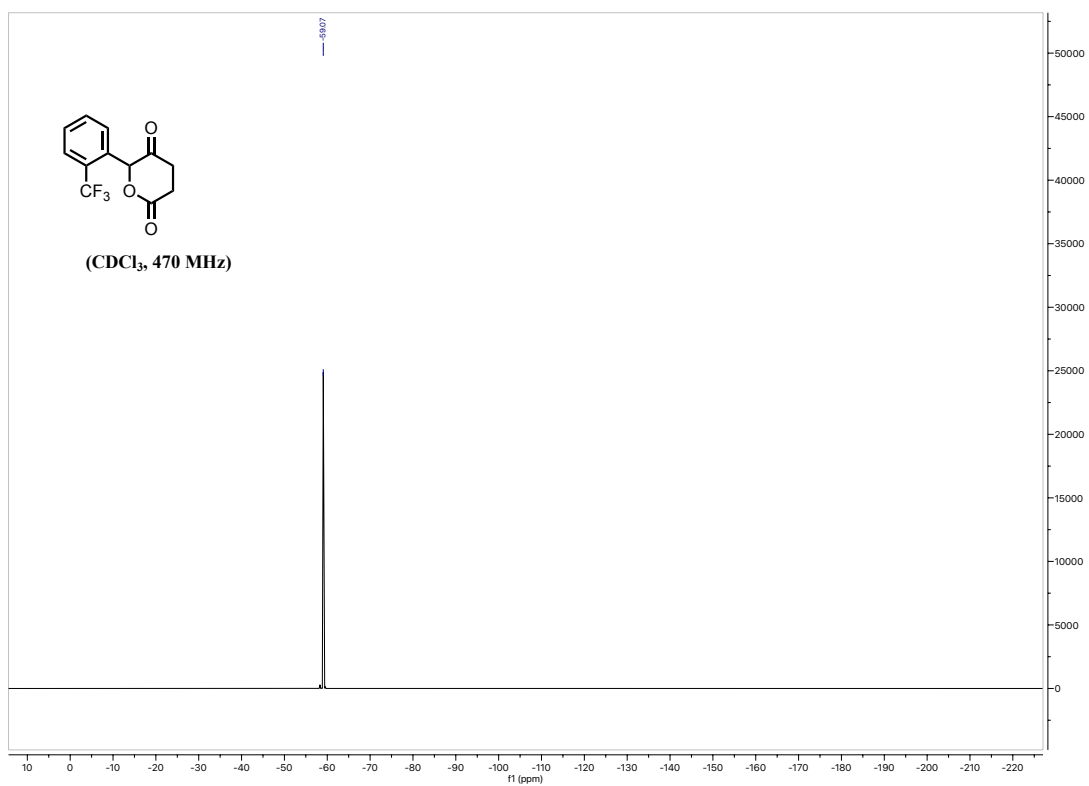



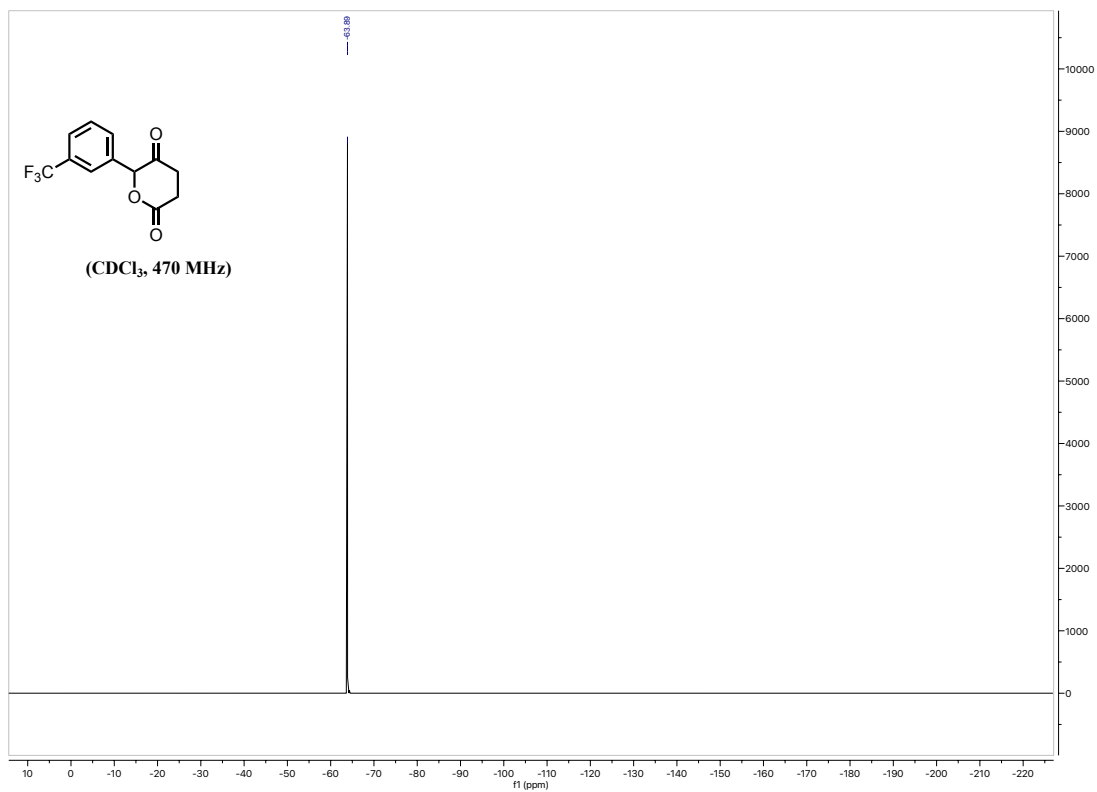

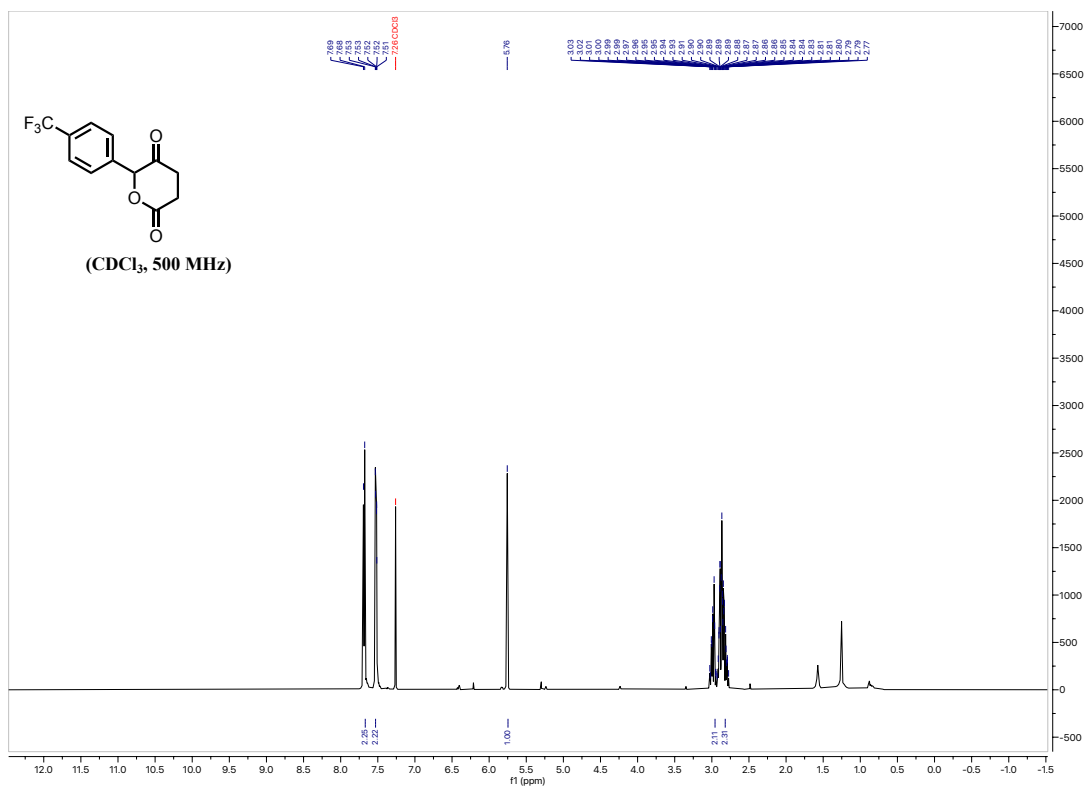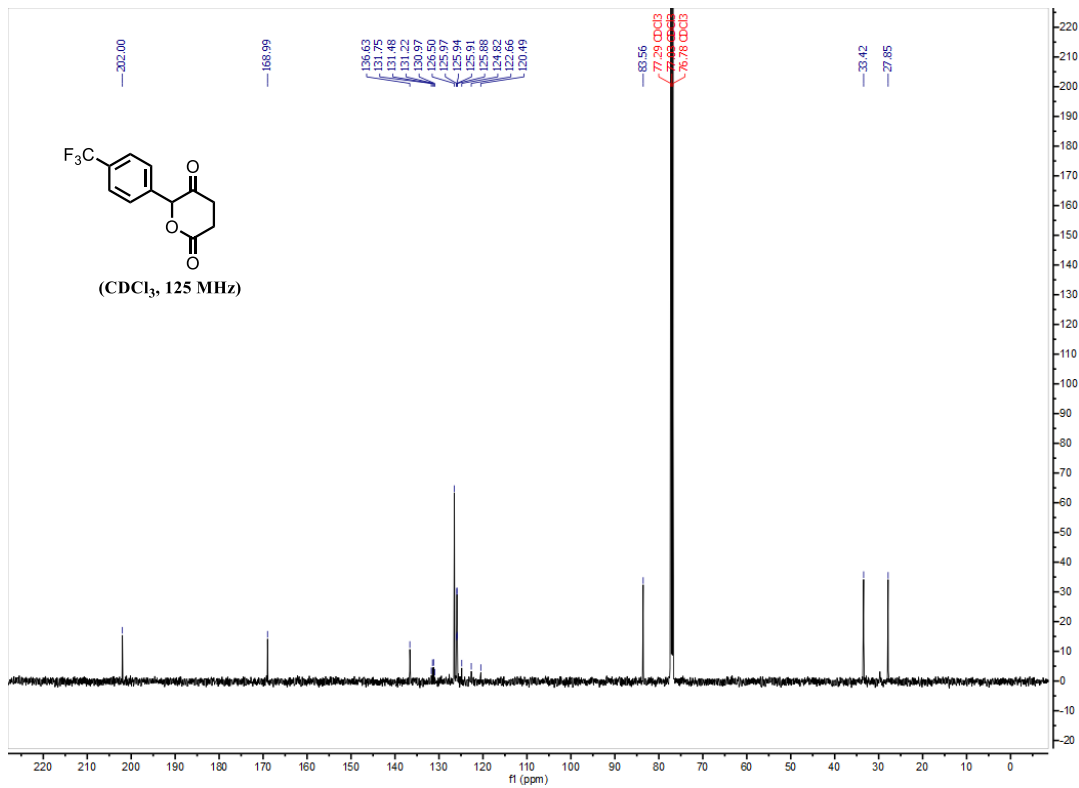

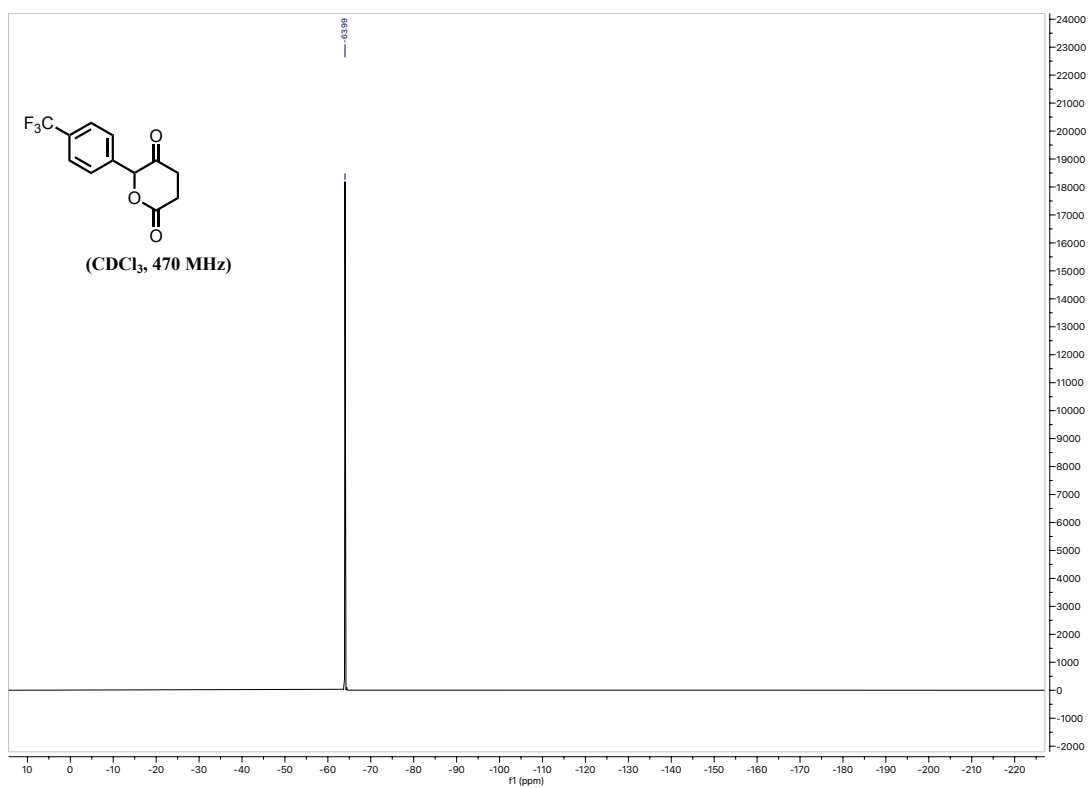





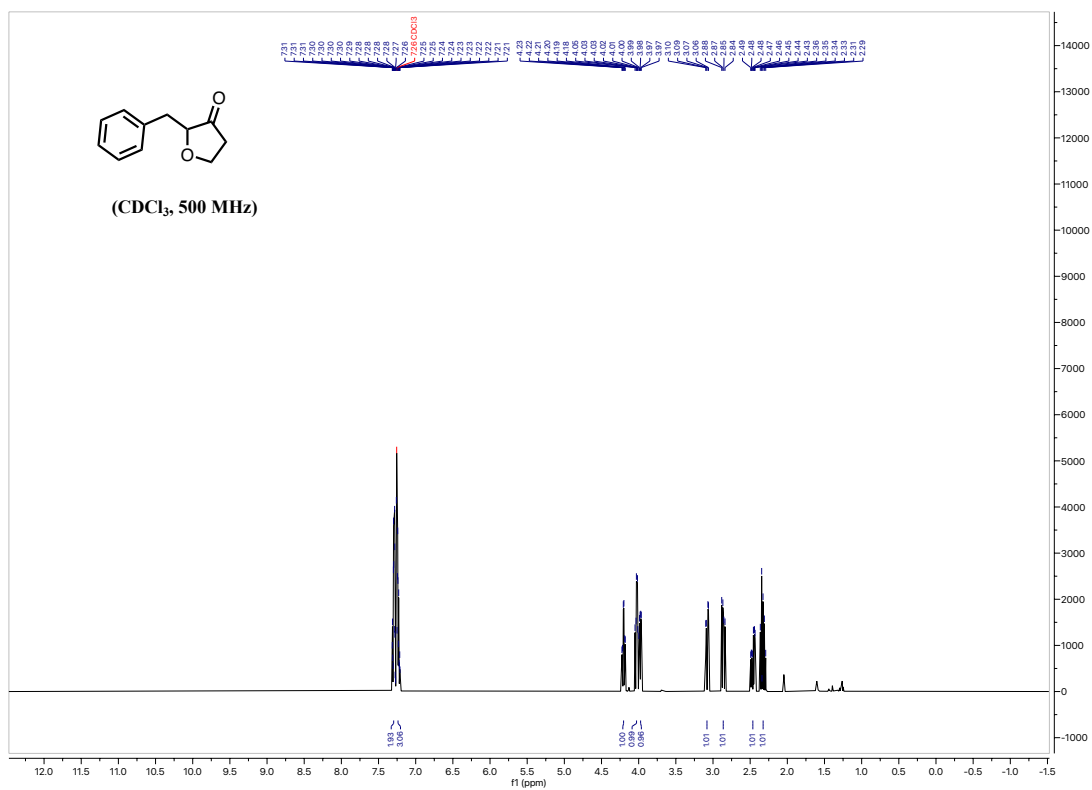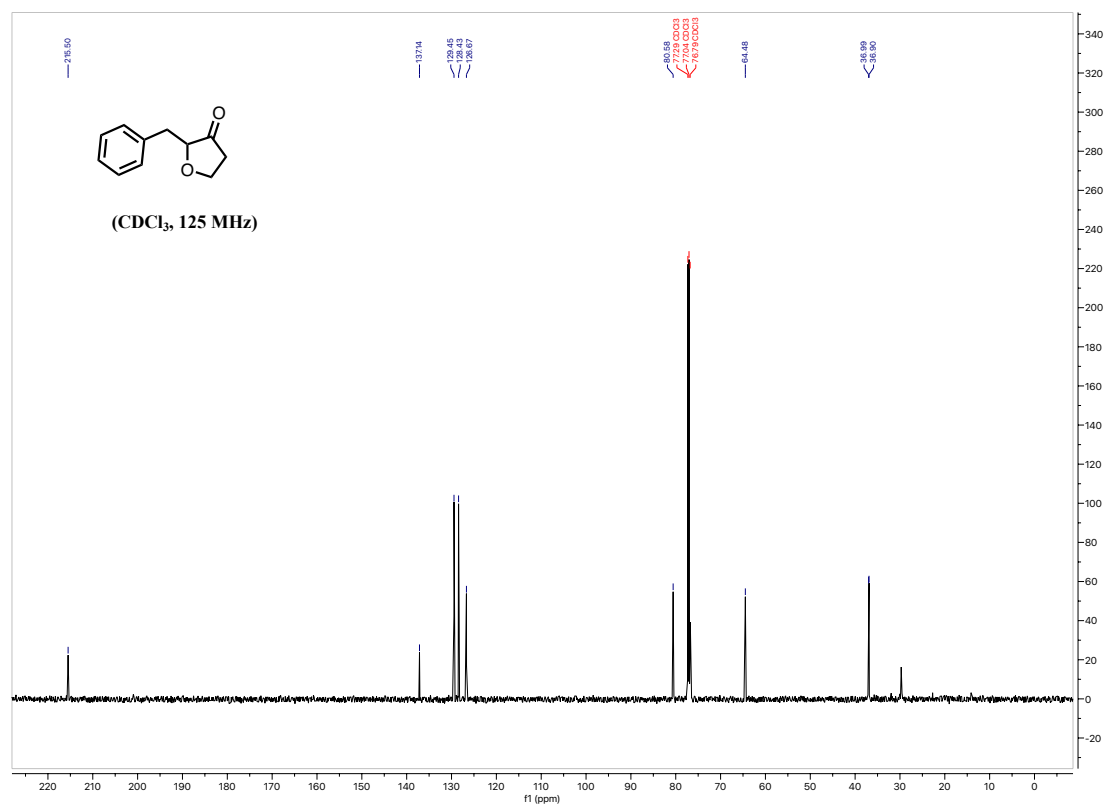



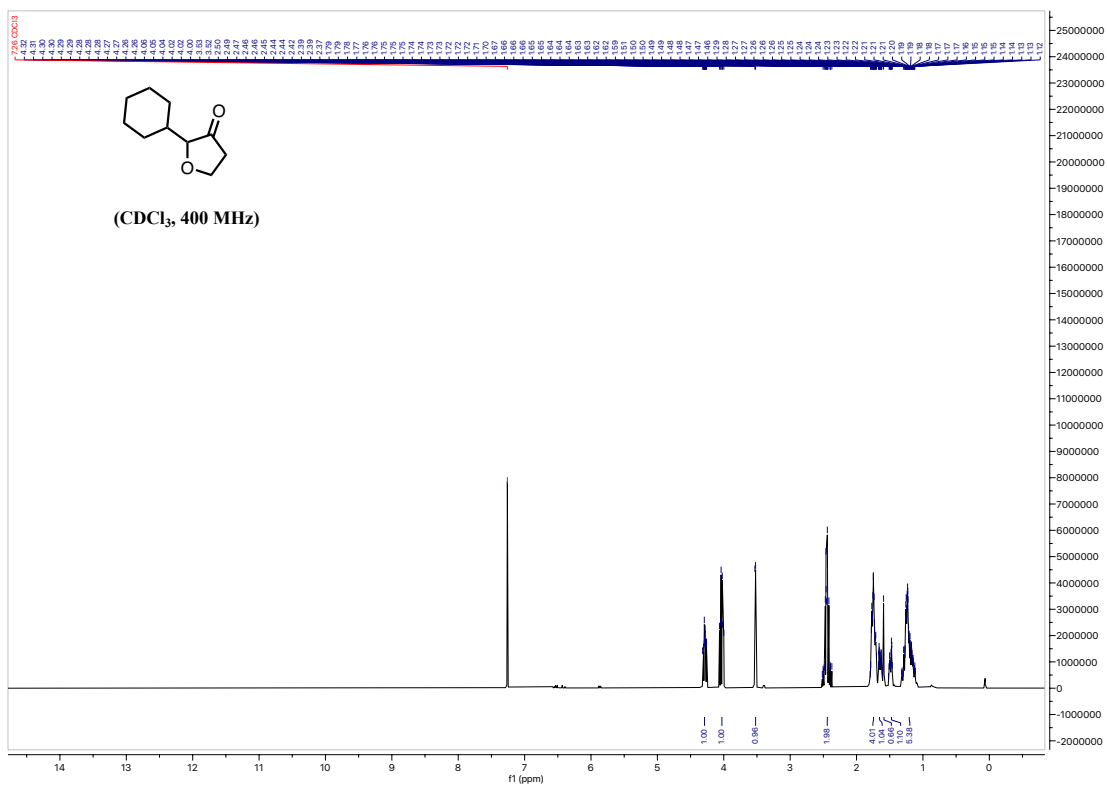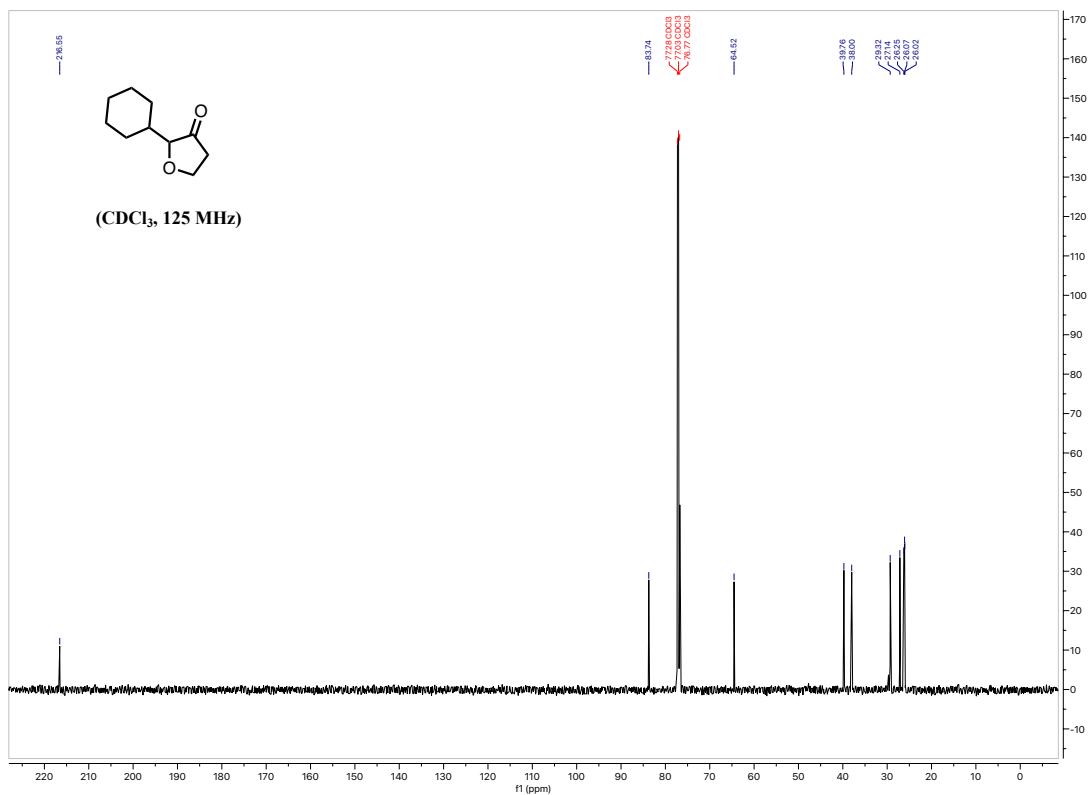

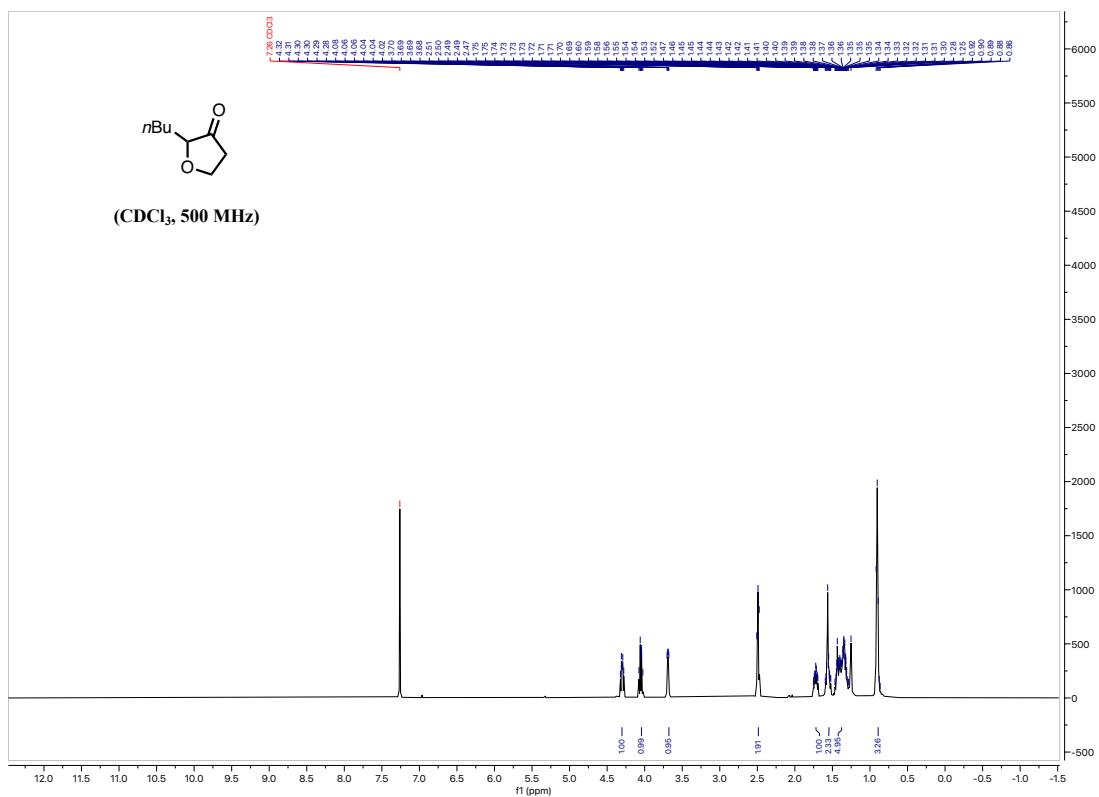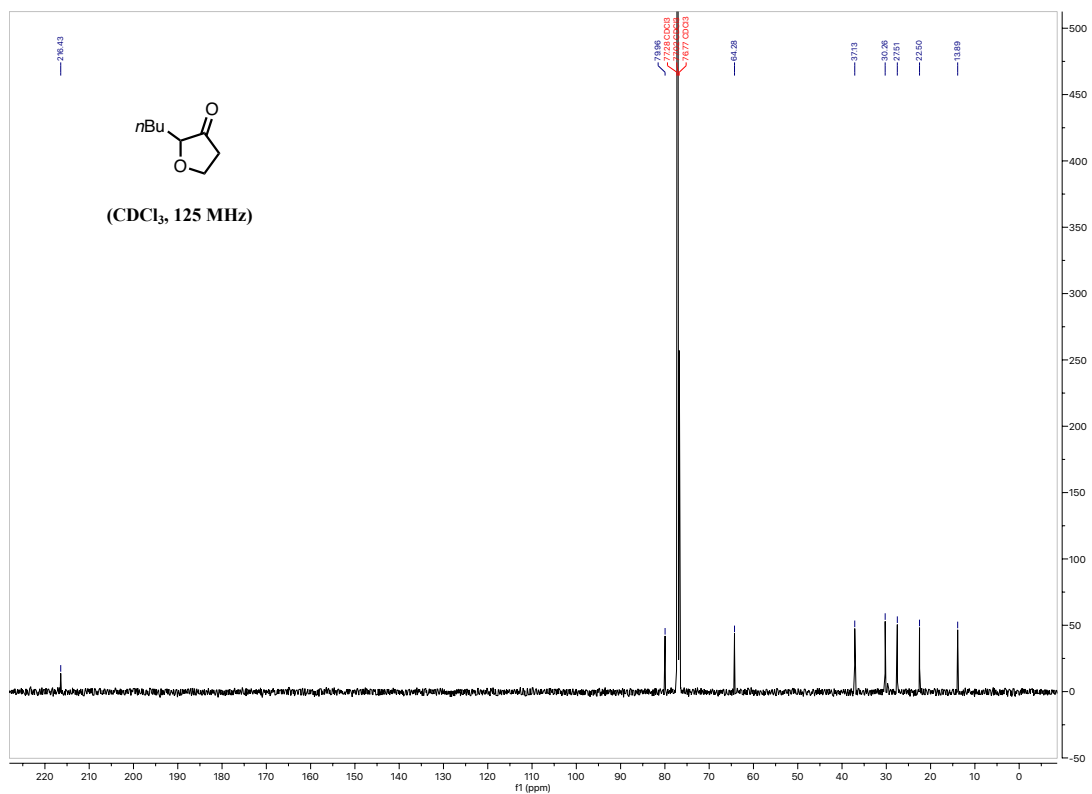

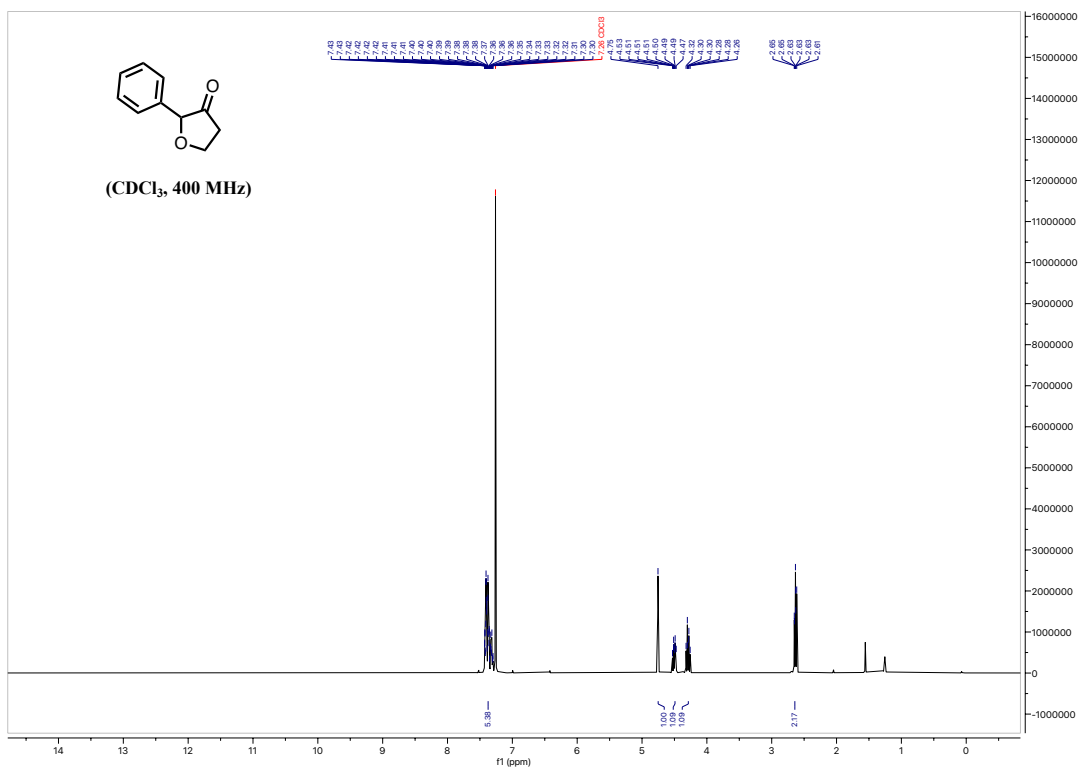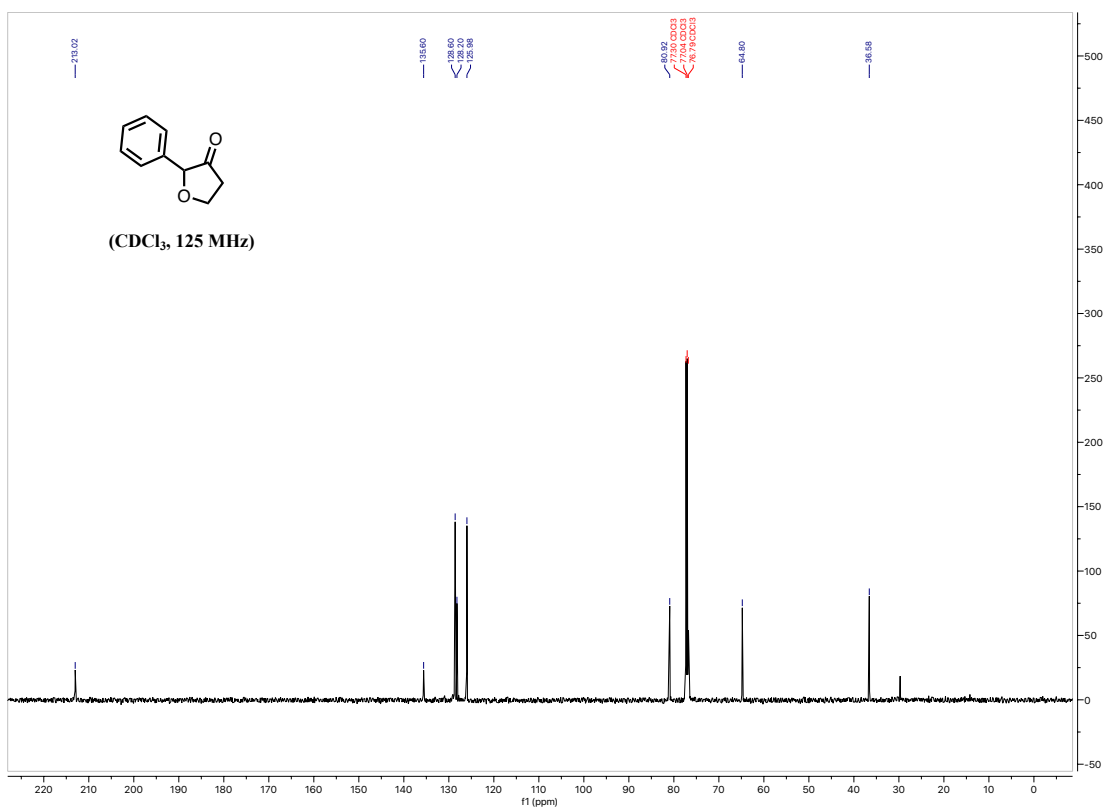

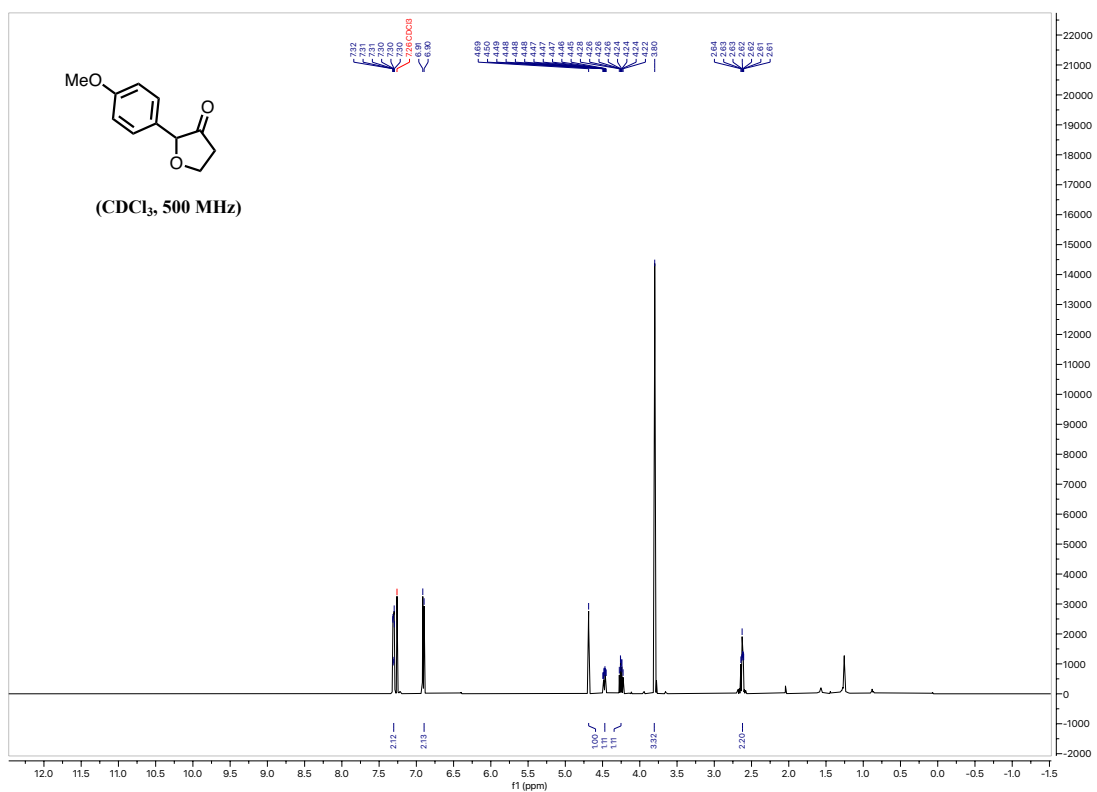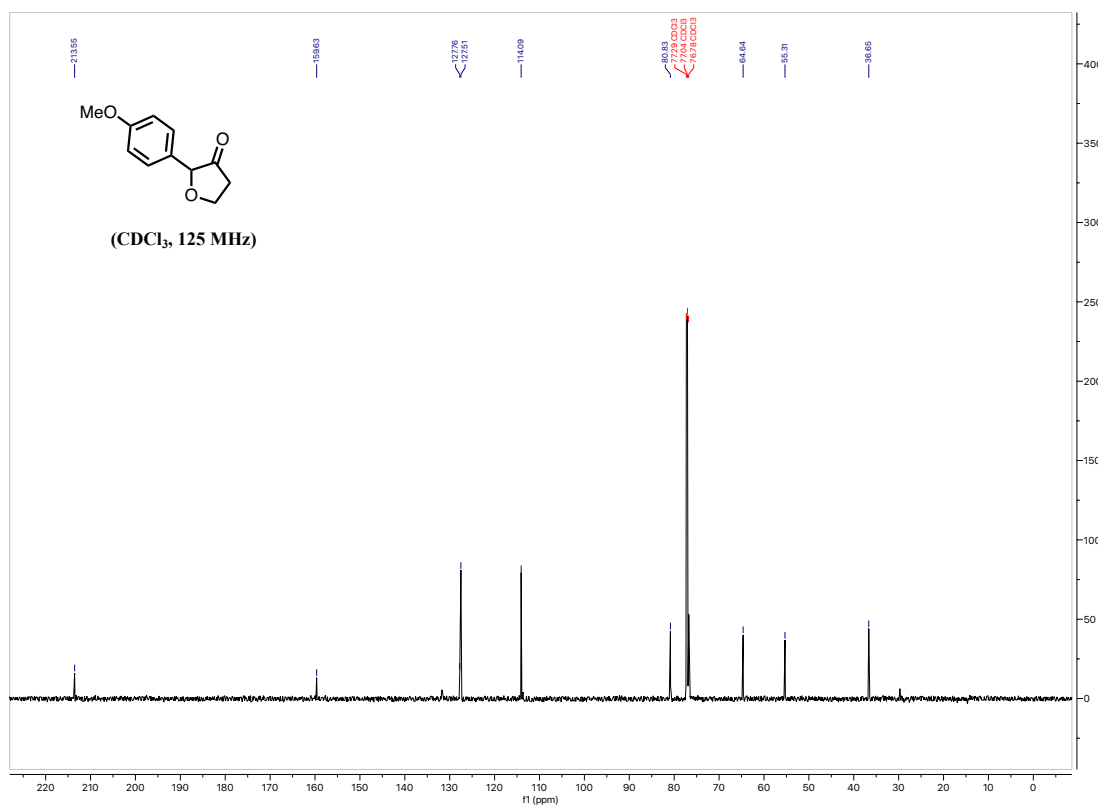

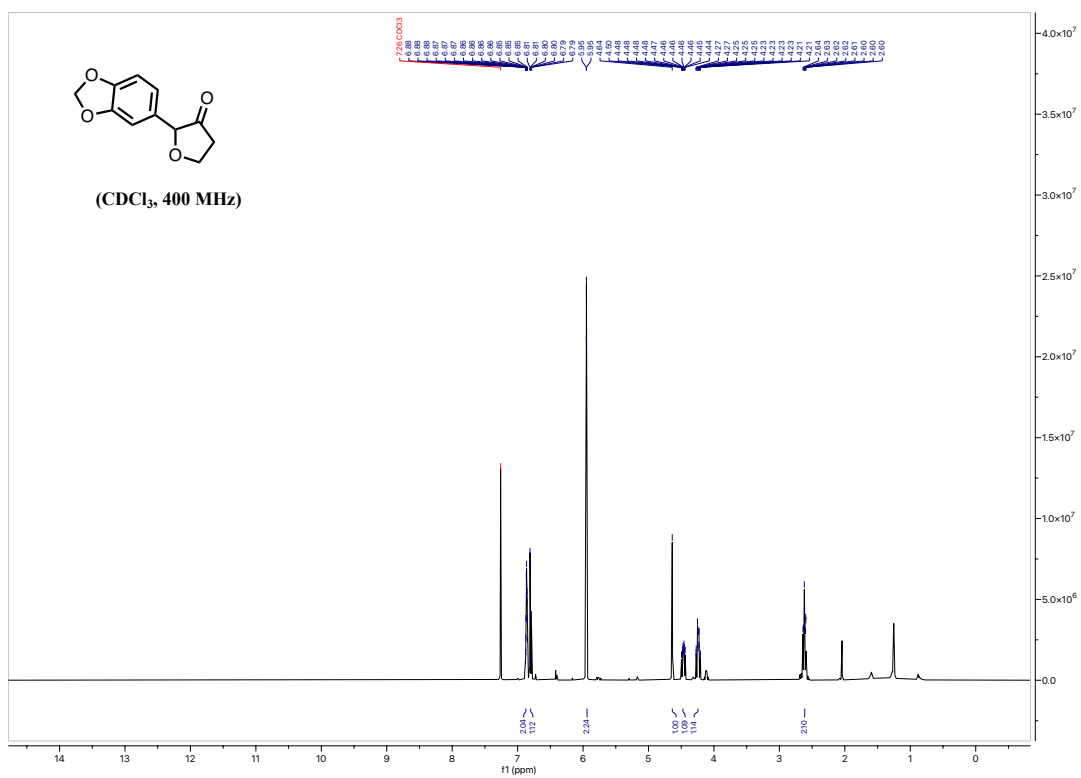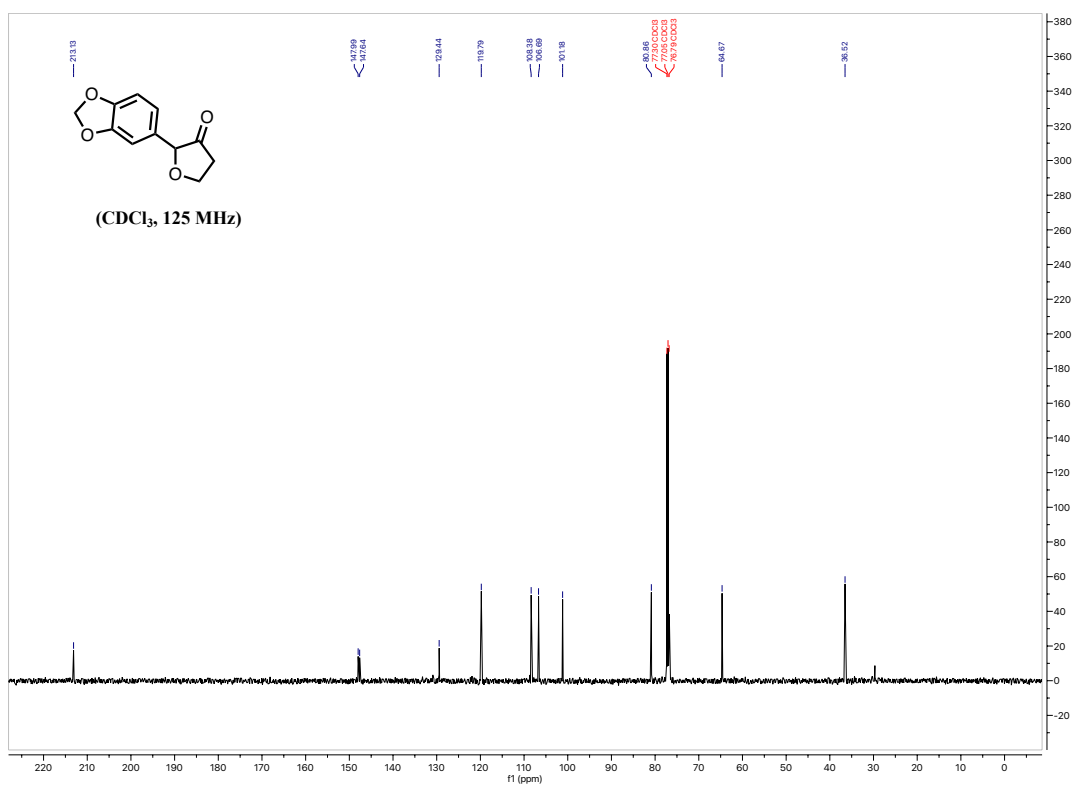





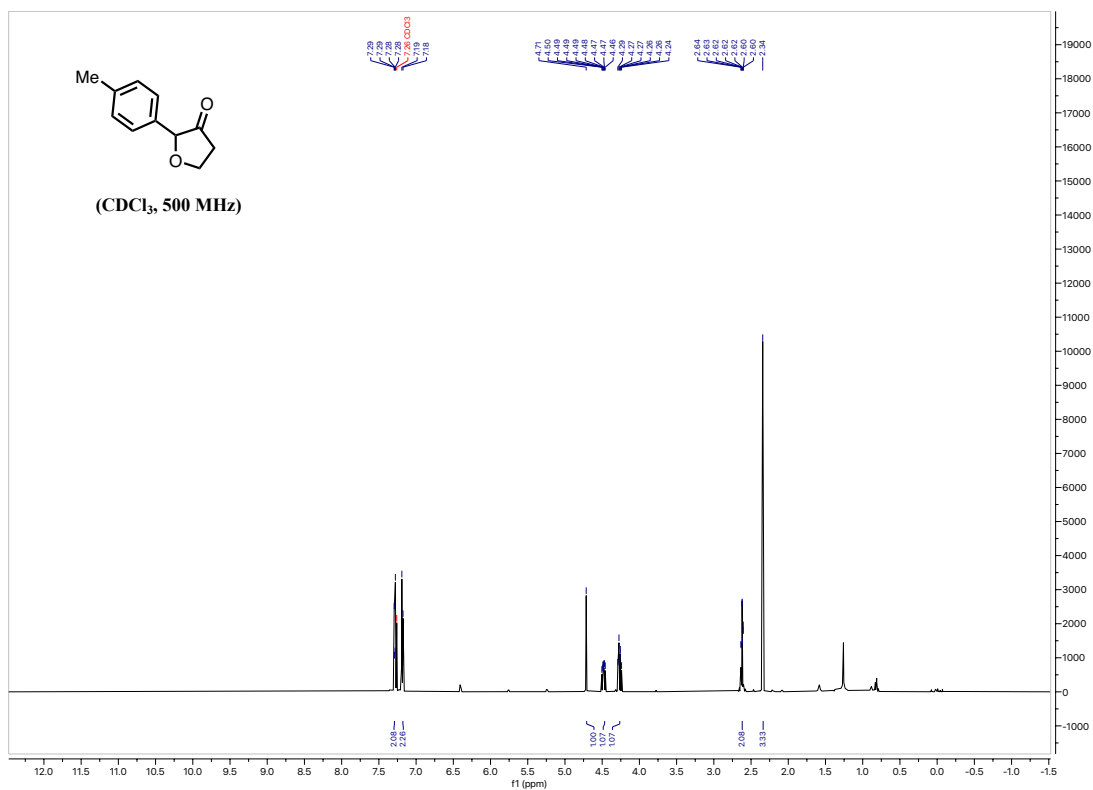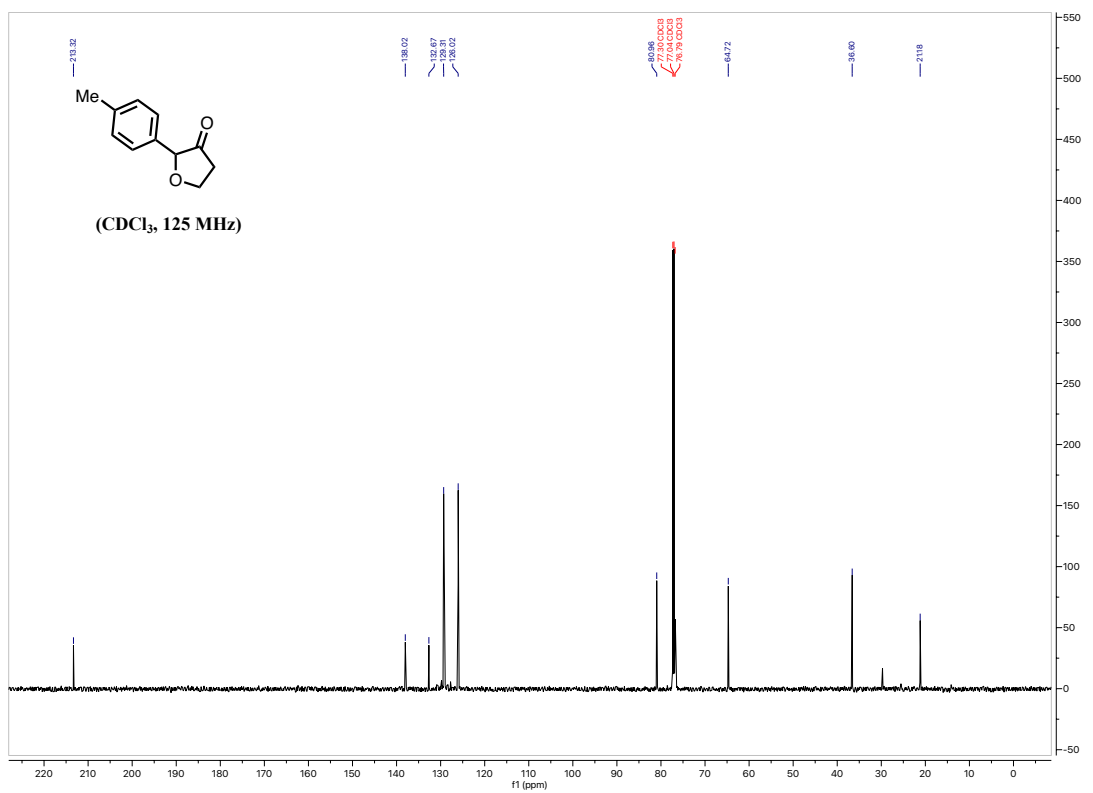







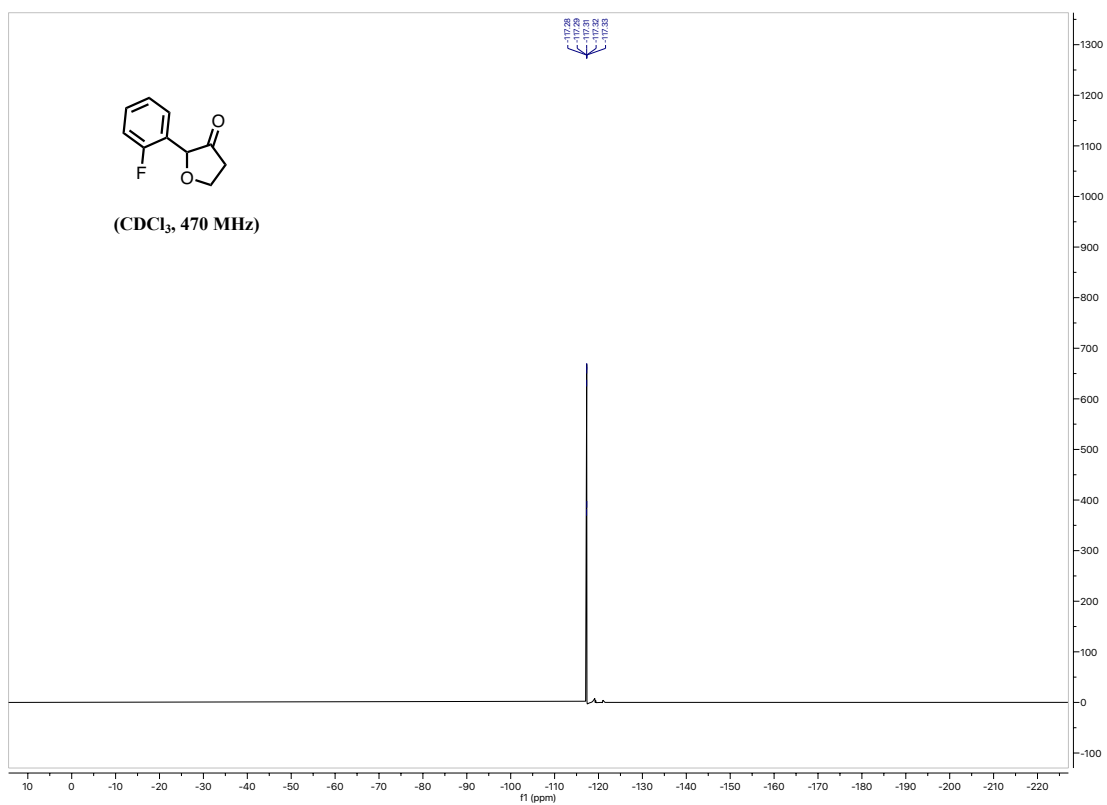



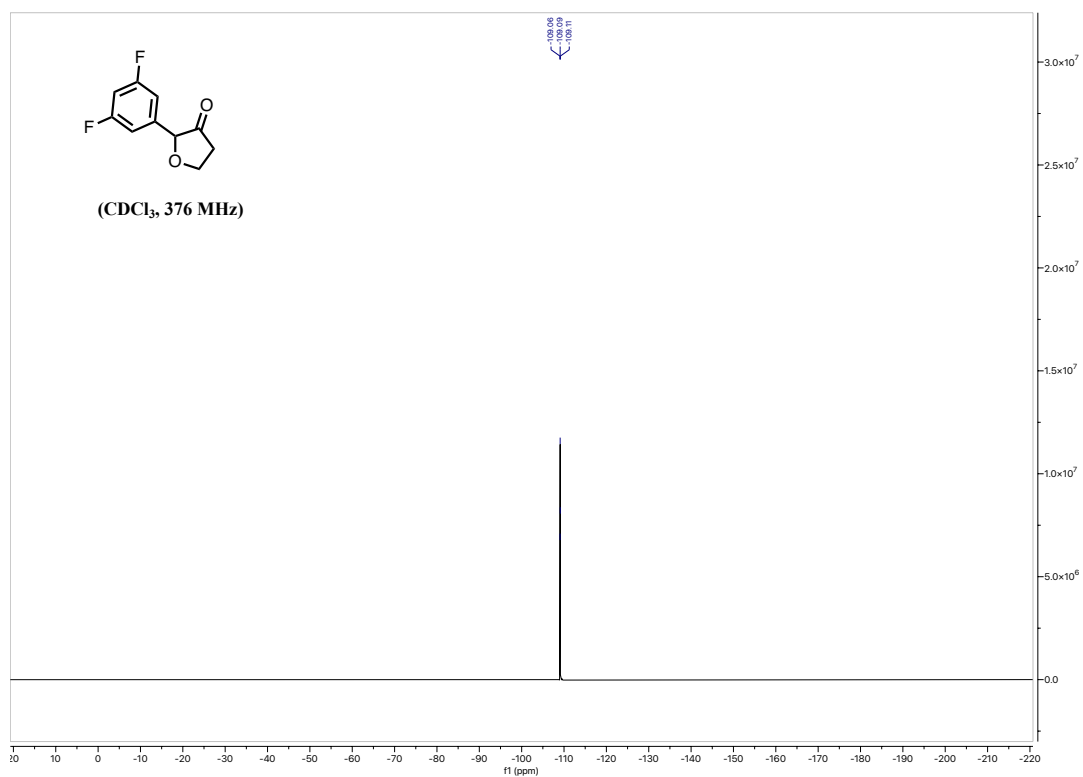









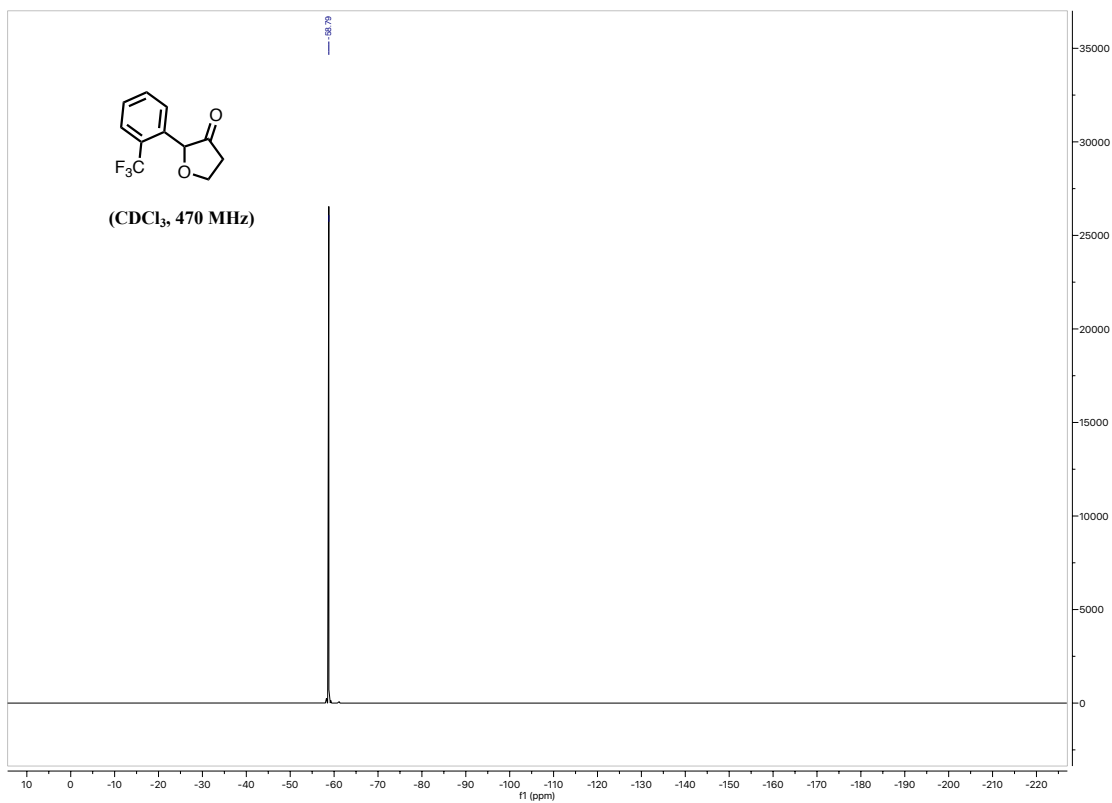



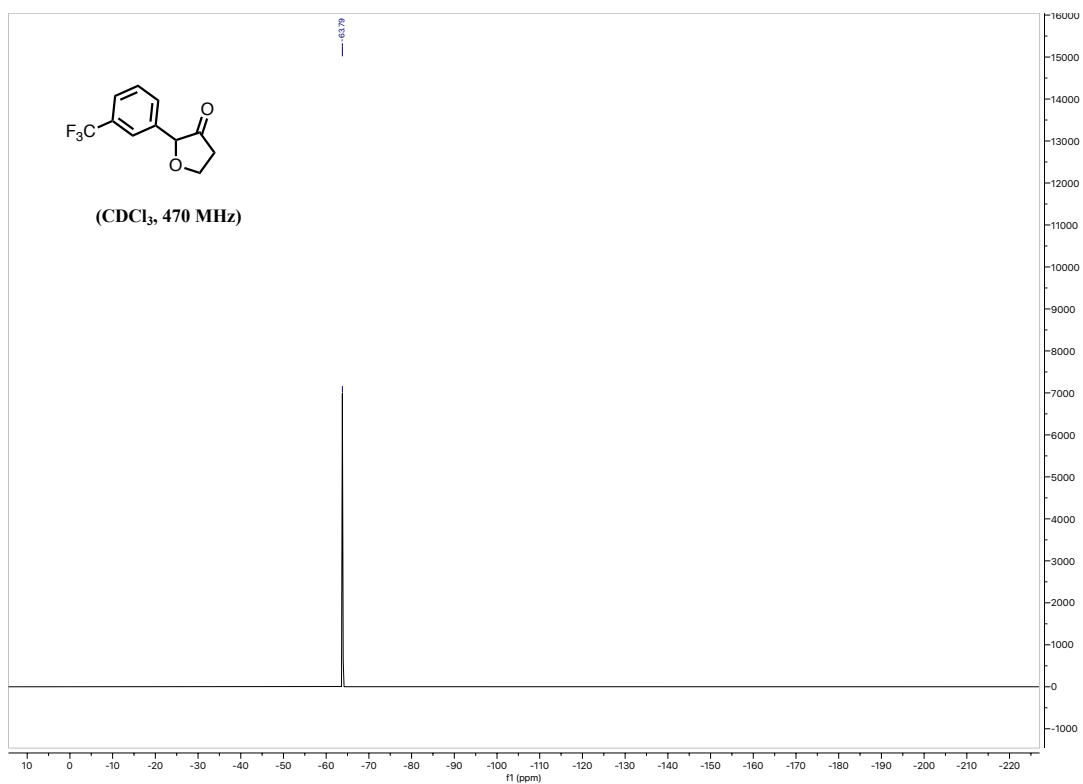

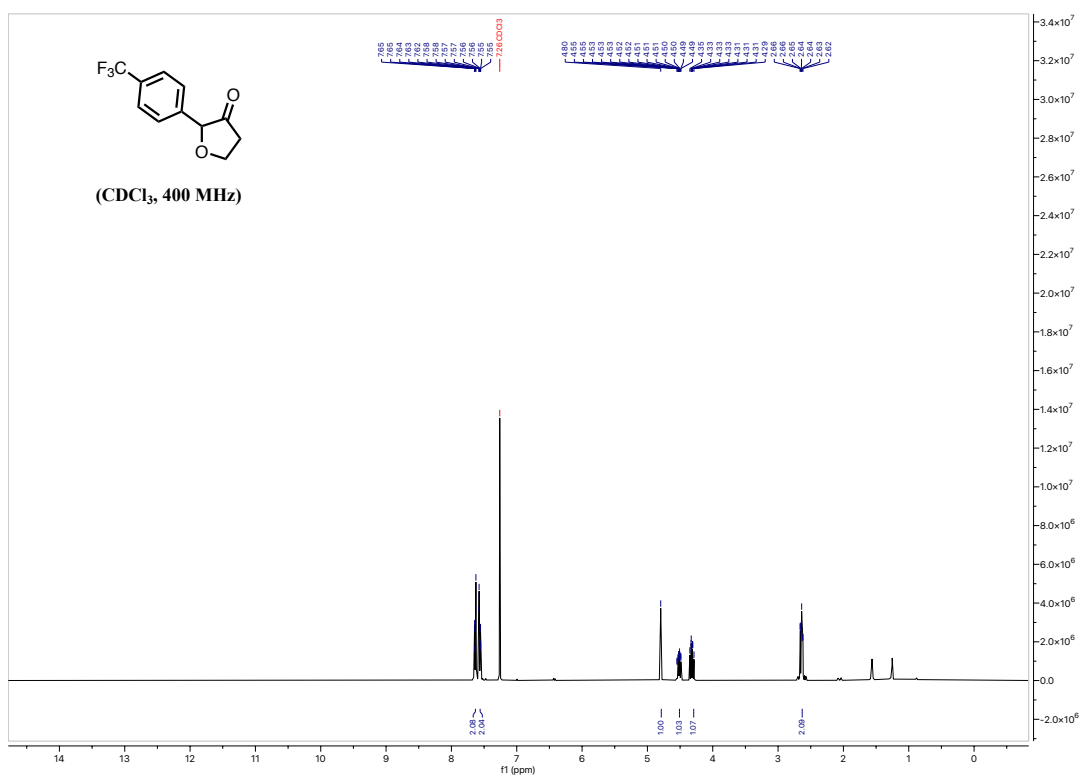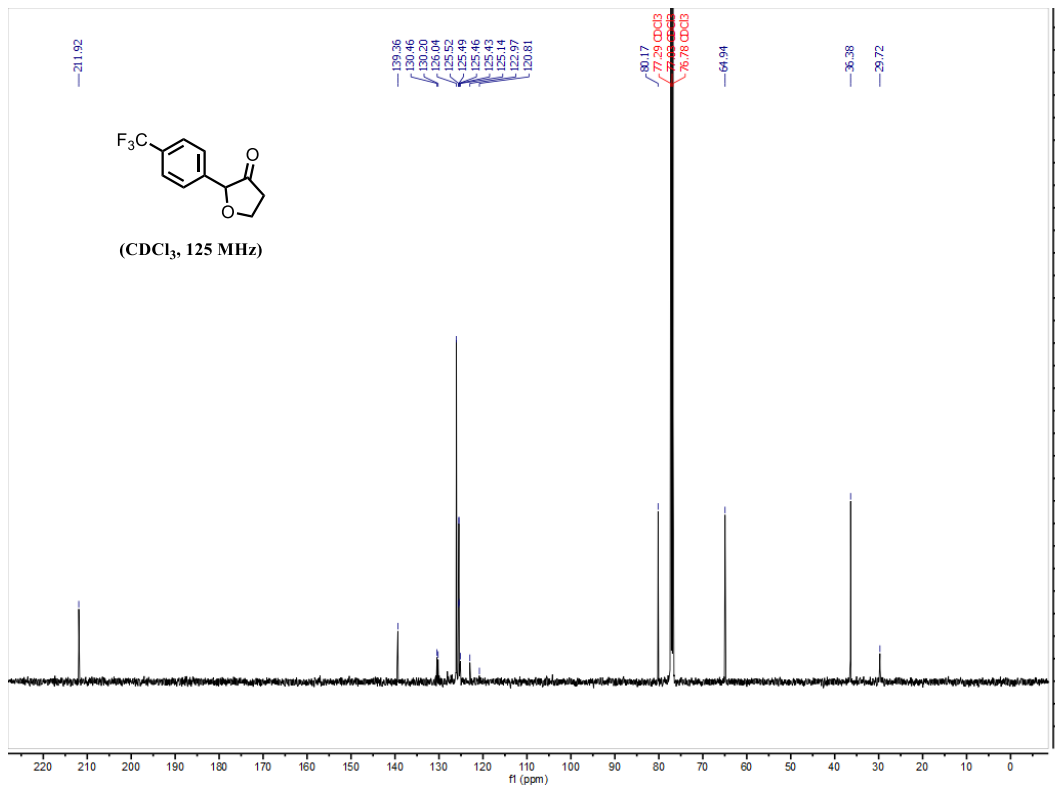

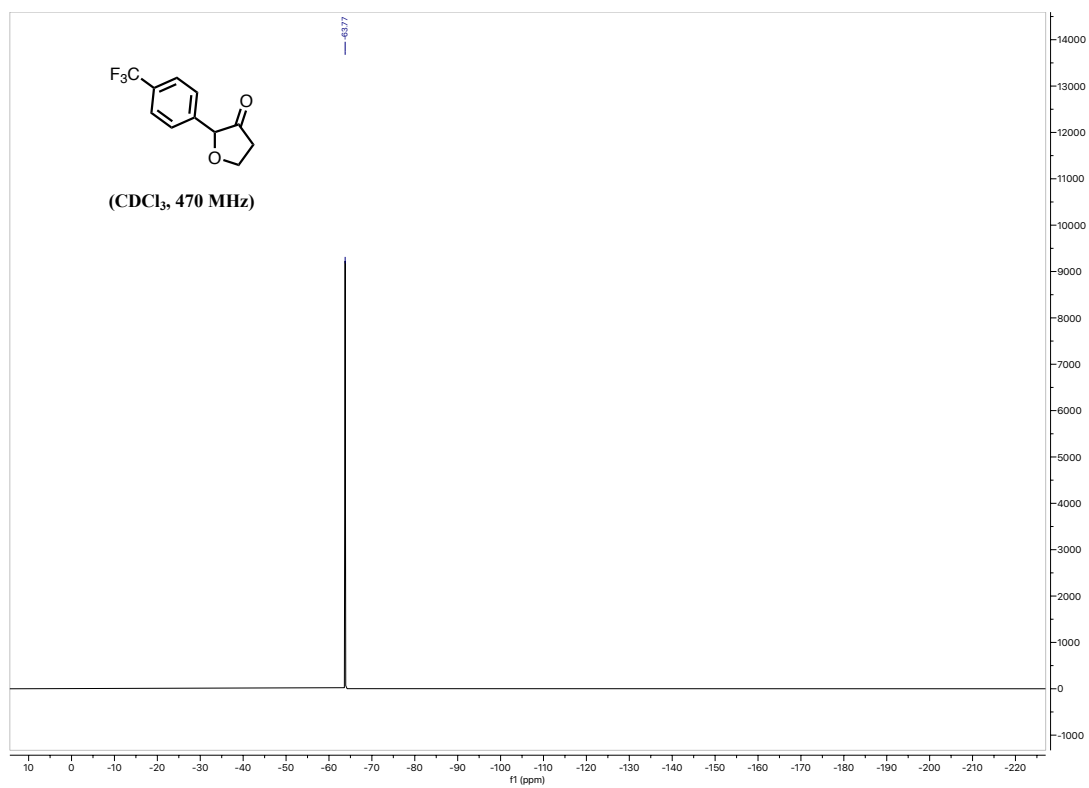

Supplement: d4cc03255a1.pdf [file d4cc03255a1.pdf]
